# Supplementary material
Source: Research Square preprint supplement (doi:10.21203/rs.3.rs-9074104/v1)
Supplement: Supplementary file 1 [file 110b177b9a342b16773392f8.xlsx]

## Sheet: PCA_thresholds
site	threshold_date	pc1_value	direction	top_loading_metrics
Alam	2018-01-28	2.0105	increase	num_connected_components (0.485); total_area (0.460); num_merges (0.451)
Alam	2018-03-12	3.06668	decrease	num_connected_components (0.485); total_area (0.460); num_merges (0.451)
Alam	2018-04-29	0.589386	decrease	num_connected_components (0.485); total_area (0.460); num_merges (0.451)
Alam	2019-01-18	2.0149	increase	num_connected_components (0.485); total_area (0.460); num_merges (0.451)
Alam	2019-04-05	0.385785	decrease	num_connected_components (0.485); total_area (0.460); num_merges (0.451)
Alam	2021-02-05	2.3329	increase	num_connected_components (0.485); total_area (0.460); num_merges (0.451)
Alam	2021-04-13	0.614081	decrease	num_connected_components (0.485); total_area (0.460); num_merges (0.451)
Alam	2021-12-09	-1.00564	increase	num_connected_components (0.485); total_area (0.460); num_merges (0.451)
Alam	2022-01-07	5.0237	increase	num_connected_components (0.485); total_area (0.460); num_merges (0.451)
Alam	2022-03-08	2.64551	decrease	num_connected_components (0.485); total_area (0.460); num_merges (0.451)
Alam	2022-12-16	-0.435088	increase	num_connected_components (0.485); total_area (0.460); num_merges (0.451)
Alam	2023-04-15	0.108965	decrease	num_connected_components (0.485); total_area (0.460); num_merges (0.451)
Alam	2024-01-21	1.9404	increase	num_connected_components (0.485); total_area (0.460); num_merges (0.451)
Alam	2024-05-03	0.956461	decrease	num_connected_components (0.485); total_area (0.460); num_merges (0.451)
Annsjon	2016-01-14	1.613	increase	num_connected_components (0.597); num_fragmentations (0.479); num_merges (0.438)
Annsjon	2016-03-26	0.274875	decrease	num_connected_components (0.597); num_fragmentations (0.479); num_merges (0.438)
Annsjon	2016-10-29	1.39327	increase	num_connected_components (0.597); num_fragmentations (0.479); num_merges (0.438)
Annsjon	2017-05-15	-1.29708	decrease	num_connected_components (0.597); num_fragmentations (0.479); num_merges (0.438)
Annsjon	2017-10-24	1.91226	increase	num_connected_components (0.597); num_fragmentations (0.479); num_merges (0.438)
Annsjon	2018-05-15	0.94772	decrease	num_connected_components (0.597); num_fragmentations (0.479); num_merges (0.438)
Annsjon	2018-12-05	-0.4202	increase	num_connected_components (0.597); num_fragmentations (0.479); num_merges (0.438)
Annsjon	2019-05-16	-0.848127	decrease	num_connected_components (0.597); num_fragmentations (0.479); num_merges (0.438)
Annsjon	2019-12-06	0.598401	increase	num_connected_components (0.597); num_fragmentations (0.479); num_merges (0.438)
Annsjon	2020-05-29	-0.884187	decrease	num_connected_components (0.597); num_fragmentations (0.479); num_merges (0.438)
Annsjon	2020-12-30	0.658487	increase	num_connected_components (0.597); num_fragmentations (0.479); num_merges (0.438)
Annsjon	2021-05-24	-1.02854	decrease	num_connected_components (0.597); num_fragmentations (0.479); num_merges (0.438)
Annsjon	2021-11-25	0.0941147	increase	num_connected_components (0.597); num_fragmentations (0.479); num_merges (0.438)
Annsjon	2022-05-06	1.49138	decrease	num_connected_components (0.597); num_fragmentations (0.479); num_merges (0.438)
Annsjon	2023-12-03	2.92526	increase	num_connected_components (0.597); num_fragmentations (0.479); num_merges (0.438)
Annsjon	2024-04-01	1.08685	decrease	num_connected_components (0.597); num_fragmentations (0.479); num_merges (0.438)
Berezinsky	2015-04-11	4.28609	decrease	num_connected_components (0.463); num_merges (0.443); total_area (0.434)
Berezinsky	2016-06-04	-1.00621	decrease	num_connected_components (0.463); num_merges (0.443); total_area (0.434)
Berezinsky	2016-10-26	-0.7326	increase	num_connected_components (0.463); num_merges (0.443); total_area (0.434)
Berezinsky	2017-05-17	-0.182714	decrease	num_connected_components (0.463); num_merges (0.443); total_area (0.434)
Berezinsky	2018-01-01	0.027359	increase	num_connected_components (0.463); num_merges (0.443); total_area (0.434)
Berezinsky	2018-04-12	2.01647	decrease	num_connected_components (0.463); num_merges (0.443); total_area (0.434)
Berezinsky	2018-12-26	1.4124	increase	num_connected_components (0.463); num_merges (0.443); total_area (0.434)
Berezinsky	2019-05-07	-1.06681	decrease	num_connected_components (0.463); num_merges (0.443); total_area (0.434)
Berezinsky	2020-01-15	-0.847608	increase	num_connected_components (0.463); num_merges (0.443); total_area (0.434)
Berezinsky	2020-05-14	-0.396055	decrease	num_connected_components (0.463); num_merges (0.443); total_area (0.434)
Berezinsky	2020-11-21	0.0880858	increase	num_connected_components (0.463); num_merges (0.443); total_area (0.434)
Berezinsky	2021-04-14	0.0628356	decrease	num_connected_components (0.463); num_merges (0.443); total_area (0.434)
Berezinsky	2021-10-18	0.514753	decrease	num_connected_components (0.463); num_merges (0.443); total_area (0.434)
Berezinsky	2022-05-28	-0.805516	decrease	num_connected_components (0.463); num_merges (0.443); total_area (0.434)
Berezinsky	2022-11-24	0.23061	increase	num_connected_components (0.463); num_merges (0.443); total_area (0.434)
Berezinsky	2023-02-28	5.24913	increase	num_connected_components (0.463); num_merges (0.443); total_area (0.434)
Berezinsky	2023-04-17	0.786277	decrease	num_connected_components (0.463); num_merges (0.443); total_area (0.434)
Berezinsky	2023-07-15	1.03728	decrease	num_connected_components (0.463); num_merges (0.443); total_area (0.434)
Berezinsky	2023-11-12	-1.06382	increase	num_connected_components (0.463); num_merges (0.443); total_area (0.434)
Berezinsky	2024-03-18	0.933866	decrease	num_connected_components (0.463); num_merges (0.443); total_area (0.434)
Biesbosch	2015-06-29	3.57346	increase	num_merges (0.552); num_new_components (0.537); total_area (0.487)
Biesbosch	2015-08-09	-0.793896	decrease	num_merges (0.552); num_new_components (0.537); total_area (0.487)
Biesbosch	2017-02-23	1.85268	increase	num_merges (0.552); num_new_components (0.537); total_area (0.487)
Biesbosch	2017-03-08	-0.662385	decrease	num_merges (0.552); num_new_components (0.537); total_area (0.487)
Biesbosch	2017-12-08	1.93804	increase	num_merges (0.552); num_new_components (0.537); total_area (0.487)
Biesbosch	2018-02-24	3.43541	increase	num_merges (0.552); num_new_components (0.537); total_area (0.487)
Biesbosch	2018-03-09	-0.322524	decrease	num_merges (0.552); num_new_components (0.537); total_area (0.487)
Biesbosch	2018-05-26	-0.631147	increase	num_merges (0.552); num_new_components (0.537); total_area (0.487)
Biesbosch	2018-12-21	1.50567	increase	num_merges (0.552); num_new_components (0.537); total_area (0.487)
Biesbosch	2019-01-21	0.0318537	increase	num_merges (0.552); num_new_components (0.537); total_area (0.487)
Biesbosch	2020-02-02	0.824597	increase	num_merges (0.552); num_new_components (0.537); total_area (0.487)
Biesbosch	2020-03-16	0.572481	decrease	num_merges (0.552); num_new_components (0.537); total_area (0.487)
Biesbosch	2022-02-04	1.26967	increase	num_merges (0.552); num_new_components (0.537); total_area (0.487)
Biesbosch	2022-04-05	1.09845	decrease	num_merges (0.552); num_new_components (0.537); total_area (0.487)
Biesbosch	2023-08-15	-1.12954	decrease	num_merges (0.552); num_new_components (0.537); total_area (0.487)
Biesbosch	2023-11-14	0.725093	increase	num_merges (0.552); num_new_components (0.537); total_area (0.487)
Biesbosch	2024-03-18	0.103252	decrease	num_merges (0.552); num_new_components (0.537); total_area (0.487)
Camargue	2016-07-05	-1.82074	decrease	num_merges (0.495); total_area (0.494); num_connected_components (0.474)
Camargue	2016-10-21	0.574533	increase	num_merges (0.495); total_area (0.494); num_connected_components (0.474)
Camargue	2017-06-18	-1.02149	decrease	num_merges (0.495); total_area (0.494); num_connected_components (0.474)
Camargue	2017-11-15	-0.483104	increase	num_merges (0.495); total_area (0.494); num_connected_components (0.474)
Camargue	2018-01-14	2.40102	increase	num_merges (0.495); total_area (0.494); num_connected_components (0.474)
Camargue	2018-06-13	1.17806	decrease	num_merges (0.495); total_area (0.494); num_connected_components (0.474)
Camargue	2018-10-11	-0.369743	increase	num_merges (0.495); total_area (0.494); num_connected_components (0.474)
Camargue	2019-06-08	-0.335023	decrease	num_merges (0.495); total_area (0.494); num_connected_components (0.474)
Camargue	2019-11-05	0.623143	increase	num_merges (0.495); total_area (0.494); num_connected_components (0.474)
Camargue	2020-07-02	-1.21621	decrease	num_merges (0.495); total_area (0.494); num_connected_components (0.474)
Camargue	2020-10-30	-0.346456	increase	num_merges (0.495); total_area (0.494); num_connected_components (0.474)
Camargue	2023-07-17	-0.850151	decrease	num_merges (0.495); total_area (0.494); num_connected_components (0.474)
Camargue	2023-11-14	-0.721595	increase	num_merges (0.495); total_area (0.494); num_connected_components (0.474)
Dombes	2015-04-01	0.620173	increase	num_connected_components (0.487); total_area (0.485); num_merges (0.471)
Dombes	2015-08-23	1.89791	decrease	num_connected_components (0.487); total_area (0.485); num_merges (0.471)
Dombes	2016-03-07	-1.04611	increase	num_connected_components (0.487); total_area (0.485); num_merges (0.471)
Dombes	2016-05-30	1.43227	decrease	num_connected_components (0.487); total_area (0.485); num_merges (0.471)
Dombes	2017-03-20	-0.429383	increase	num_connected_components (0.487); total_area (0.485); num_merges (0.471)
Dombes	2017-12-21	-2.11765	decrease	num_connected_components (0.487); total_area (0.485); num_merges (0.471)
Dombes	2018-09-17	1.78475	increase	num_connected_components (0.487); total_area (0.485); num_merges (0.471)
Dombes	2018-10-30	-1.87418	decrease	num_connected_components (0.487); total_area (0.485); num_merges (0.471)
Dombes	2019-03-28	0.799635	increase	num_connected_components (0.487); total_area (0.485); num_merges (0.471)
Dombes	2019-06-09	0.28033	decrease	num_connected_components (0.487); total_area (0.485); num_merges (0.471)
Dombes	2020-03-22	-0.128443	increase	num_connected_components (0.487); total_area (0.485); num_merges (0.471)
Dombes	2020-09-18	2.0846	decrease	num_connected_components (0.487); total_area (0.485); num_merges (0.471)
Dombes	2021-03-18	0.516218	increase	num_connected_components (0.487); total_area (0.485); num_merges (0.471)
Dombes	2021-06-21	-0.0342552	decrease	num_connected_components (0.487); total_area (0.485); num_merges (0.471)
Dombes	2022-03-24	1.51865	increase	num_connected_components (0.487); total_area (0.485); num_merges (0.471)
Dombes	2022-08-27	0.295789	decrease	num_connected_components (0.487); total_area (0.485); num_merges (0.471)
Dombes	2023-02-23	0.918436	increase	num_connected_components (0.487); total_area (0.485); num_merges (0.471)
Dombes	2023-06-23	-0.356785	decrease	num_connected_components (0.487); total_area (0.485); num_merges (0.471)
Dombes	2023-10-21	-0.784681	decrease	num_connected_components (0.487); total_area (0.485); num_merges (0.471)
Donauauen	2015-02-14	0.254799	increase	num_connected_components (0.544); num_merges (0.518); total_area (0.493)
Donauauen	2017-08-13	0.567552	decrease	num_connected_components (0.544); num_merges (0.518); total_area (0.493)
Donauauen	2018-01-23	0.243168	increase	num_connected_components (0.544); num_merges (0.518); total_area (0.493)
Donauauen	2018-04-11	0.509458	decrease	num_connected_components (0.544); num_merges (0.518); total_area (0.493)
Donauauen	2018-07-10	0.403906	decrease	num_connected_components (0.544); num_merges (0.518); total_area (0.493)
Donauauen	2018-09-20	-0.0628611	decrease	num_connected_components (0.544); num_merges (0.518); total_area (0.493)
Donauauen	2019-01-23	-0.327966	increase	num_connected_components (0.544); num_merges (0.518); total_area (0.493)
Donauauen	2019-04-12	0.302163	increase	num_connected_components (0.544); num_merges (0.518); total_area (0.493)
Donauauen	2019-08-03	0.200489	decrease	num_connected_components (0.544); num_merges (0.518); total_area (0.493)
Donauauen	2019-10-03	-2.41423	increase	num_connected_components (0.544); num_merges (0.518); total_area (0.493)
Donauauen	2019-12-02	-1.42167	increase	num_connected_components (0.544); num_merges (0.518); total_area (0.493)
Donauauen	2020-03-24	0.930972	increase	num_connected_components (0.544); num_merges (0.518); total_area (0.493)
Donauauen	2020-08-04	0.0144518	decrease	num_connected_components (0.544); num_merges (0.518); total_area (0.493)
Donauauen	2021-04-01	0.912354	increase	num_connected_components (0.544); num_merges (0.518); total_area (0.493)
Donauauen	2021-07-30	-0.418149	decrease	num_connected_components (0.544); num_merges (0.518); total_area (0.493)
Donauauen	2022-02-13	0.37114	increase	num_connected_components (0.544); num_merges (0.518); total_area (0.493)
Donauauen	2022-09-29	-0.303703	decrease	num_connected_components (0.544); num_merges (0.518); total_area (0.493)
Donauauen	2023-01-27	0.464852	increase	num_connected_components (0.544); num_merges (0.518); total_area (0.493)
Donauauen	2023-08-31	-0.353369	decrease	num_connected_components (0.544); num_merges (0.518); total_area (0.493)
Donauauen	2024-02-03	-2.48441	decrease	num_connected_components (0.544); num_merges (0.518); total_area (0.493)
Donauauen	2024-04-03	1.02952	increase	num_connected_components (0.544); num_merges (0.518); total_area (0.493)
Donauauen	2024-07-01	-1.41717	decrease	num_connected_components (0.544); num_merges (0.518); total_area (0.493)
Dunajske	2018-06-01	1.24609	decrease	num_connected_components (0.521); total_area (0.520); num_merges (0.507)
Dunajske	2018-12-28	-0.50637	increase	num_connected_components (0.521); total_area (0.520); num_merges (0.507)
Dunajske	2019-07-08	-0.821149	increase	num_connected_components (0.521); total_area (0.520); num_merges (0.507)
Dunajske	2020-01-04	-0.317739	increase	num_connected_components (0.521); total_area (0.520); num_merges (0.507)
Dunajske	2020-09-12	0.67541	decrease	num_connected_components (0.521); total_area (0.520); num_merges (0.507)
Dunajske	2021-02-09	-0.103458	increase	num_connected_components (0.521); total_area (0.520); num_merges (0.507)
Dunajske	2021-07-15	1.30563	decrease	num_connected_components (0.521); total_area (0.520); num_merges (0.507)
Dunajske	2023-08-16	-1.42687	decrease	num_connected_components (0.521); total_area (0.520); num_merges (0.507)
Farnebofjarden	2015-08-08	1.13092	decrease	num_connected_components (0.619); num_new_components (0.494); num_merges (0.394)
Farnebofjarden	2016-07-09	-0.40301	decrease	num_connected_components (0.619); num_new_components (0.494); num_merges (0.394)
Farnebofjarden	2016-12-12	0.905916	increase	num_connected_components (0.619); num_new_components (0.494); num_merges (0.394)
Farnebofjarden	2017-03-23	2.14468	decrease	num_connected_components (0.619); num_new_components (0.494); num_merges (0.394)
Farnebofjarden	2018-01-29	0.539279	increase	num_connected_components (0.619); num_new_components (0.494); num_merges (0.394)
Farnebofjarden	2018-04-24	1.00123	decrease	num_connected_components (0.619); num_new_components (0.494); num_merges (0.394)
Farnebofjarden	2018-07-29	-0.582541	decrease	num_connected_components (0.619); num_new_components (0.494); num_merges (0.394)
Farnebofjarden	2018-12-21	-0.381785	increase	num_connected_components (0.619); num_new_components (0.494); num_merges (0.394)
Farnebofjarden	2019-04-20	-1.30865	decrease	num_connected_components (0.619); num_new_components (0.494); num_merges (0.394)
Farnebofjarden	2019-05-25	-0.954973	increase	num_connected_components (0.619); num_new_components (0.494); num_merges (0.394)
Farnebofjarden	2019-07-24	-0.387187	decrease	num_connected_components (0.619); num_new_components (0.494); num_merges (0.394)
Farnebofjarden	2019-09-11	-0.362666	increase	num_connected_components (0.619); num_new_components (0.494); num_merges (0.394)
Farnebofjarden	2020-04-02	-0.714595	decrease	num_connected_components (0.619); num_new_components (0.494); num_merges (0.394)
Farnebofjarden	2020-05-24	0.218797	increase	num_connected_components (0.619); num_new_components (0.494); num_merges (0.394)
Farnebofjarden	2021-03-26	-0.644313	decrease	num_connected_components (0.619); num_new_components (0.494); num_merges (0.394)
Farnebofjarden	2021-05-25	0.172501	increase	num_connected_components (0.619); num_new_components (0.494); num_merges (0.394)
Farnebofjarden	2021-07-24	1.13274	decrease	num_connected_components (0.619); num_new_components (0.494); num_merges (0.394)
Farnebofjarden	2022-01-20	2.44492	increase	num_connected_components (0.619); num_new_components (0.494); num_merges (0.394)
Farnebofjarden	2022-04-09	0.54558	decrease	num_connected_components (0.619); num_new_components (0.494); num_merges (0.394)
Farnebofjarden	2022-10-06	0.00739713	decrease	num_connected_components (0.619); num_new_components (0.494); num_merges (0.394)
Farnebofjarden	2023-01-15	-0.985357	increase	num_connected_components (0.619); num_new_components (0.494); num_merges (0.394)
Farnebofjarden	2023-04-09	1.59293	decrease	num_connected_components (0.619); num_new_components (0.494); num_merges (0.394)
Farnebofjarden	2023-11-23	1.03621	increase	num_connected_components (0.619); num_new_components (0.494); num_merges (0.394)
Farnebofjarden	2024-03-24	-0.376118	decrease	num_connected_components (0.619); num_new_components (0.494); num_merges (0.394)
Farnebofjarden	2024-08-20	-0.567824	decrease	num_connected_components (0.619); num_new_components (0.494); num_merges (0.394)
Gemenc	2015-04-07	3.27309	increase	num_connected_components (0.475); total_area (0.470); num_merges (0.443)
Gemenc	2015-08-29	-1.68463	decrease	num_connected_components (0.475); total_area (0.470); num_merges (0.443)
Gemenc	2017-01-08	1.54991	increase	num_connected_components (0.475); total_area (0.470); num_merges (0.443)
Gemenc	2017-08-12	0.319172	decrease	num_connected_components (0.475); total_area (0.470); num_merges (0.443)
Gemenc	2018-12-29	-0.707106	increase	num_connected_components (0.475); total_area (0.470); num_merges (0.443)
Gemenc	2019-05-28	-0.176674	decrease	num_connected_components (0.475); total_area (0.470); num_merges (0.443)
Gemenc	2020-01-29	0.553026	increase	num_connected_components (0.475); total_area (0.470); num_merges (0.443)
Gemenc	2020-06-27	-0.245896	decrease	num_connected_components (0.475); total_area (0.470); num_merges (0.443)
Gemenc	2021-01-29	0.697545	decrease	num_connected_components (0.475); total_area (0.470); num_merges (0.443)
Gemenc	2021-08-27	-0.0079553	decrease	num_connected_components (0.475); total_area (0.470); num_merges (0.443)
Gemenc	2022-01-24	4.01714	increase	num_connected_components (0.475); total_area (0.470); num_merges (0.443)
Gemenc	2022-08-16	2.7933	decrease	num_connected_components (0.475); total_area (0.470); num_merges (0.443)
Havel	2015-11-29	0.417911	increase	num_connected_components (0.509); total_area (0.488); num_merges (0.424)
Havel	2016-04-09	0.638472	decrease	num_connected_components (0.509); total_area (0.488); num_merges (0.424)
Havel	2016-11-17	0.0625344	increase	num_connected_components (0.509); total_area (0.488); num_merges (0.424)
Havel	2017-05-10	1.2319	decrease	num_connected_components (0.509); total_area (0.488); num_merges (0.424)
Havel	2017-12-18	3.05773	increase	num_connected_components (0.509); total_area (0.488); num_merges (0.424)
Havel	2018-06-04	-1.73268	decrease	num_connected_components (0.509); total_area (0.488); num_merges (0.424)
Havel	2018-12-07	-0.929465	increase	num_connected_components (0.509); total_area (0.488); num_merges (0.424)
Havel	2019-05-18	-1.0708	decrease	num_connected_components (0.509); total_area (0.488); num_merges (0.424)
Havel	2019-12-14	-0.389761	increase	num_connected_components (0.509); total_area (0.488); num_merges (0.424)
Havel	2020-05-18	0.939068	decrease	num_connected_components (0.509); total_area (0.488); num_merges (0.424)
Havel	2020-11-26	0.13529	increase	num_connected_components (0.509); total_area (0.488); num_merges (0.424)
Havel	2021-06-06	-0.759967	decrease	num_connected_components (0.509); total_area (0.488); num_merges (0.424)
Havel	2021-11-03	-0.685318	increase	num_connected_components (0.509); total_area (0.488); num_merges (0.424)
Havel	2023-02-20	3.44497	increase	num_connected_components (0.509); total_area (0.488); num_merges (0.424)
Havel	2023-04-21	0.504867	decrease	num_connected_components (0.509); total_area (0.488); num_merges (0.424)
Havel	2023-12-17	1.32521	increase	num_connected_components (0.509); total_area (0.488); num_merges (0.424)
Havel	2024-04-03	0.413077	decrease	num_connected_components (0.509); total_area (0.488); num_merges (0.424)
Helge	2015-07-15	-0.90681	decrease	num_connected_components (0.504); total_area (0.475); num_merges (0.466)
Helge	2016-11-23	-0.0871525	increase	num_connected_components (0.504); total_area (0.475); num_merges (0.466)
Helge	2017-07-16	-1.98435	decrease	num_connected_components (0.504); total_area (0.475); num_merges (0.466)
Helge	2017-10-01	-0.486075	increase	num_connected_components (0.504); total_area (0.475); num_merges (0.466)
Helge	2018-04-24	-0.0693212	decrease	num_connected_components (0.504); total_area (0.475); num_merges (0.466)
Helge	2018-09-21	-1.4703	increase	num_connected_components (0.504); total_area (0.475); num_merges (0.466)
Helge	2018-10-08	0.439231	decrease	num_connected_components (0.504); total_area (0.475); num_merges (0.466)
Helge	2019-02-05	0.565135	increase	num_connected_components (0.504); total_area (0.475); num_merges (0.466)
Helge	2019-05-31	-1.35202	decrease	num_connected_components (0.504); total_area (0.475); num_merges (0.466)
Helge	2019-09-15	-0.222892	increase	num_connected_components (0.504); total_area (0.475); num_merges (0.466)
Helge	2020-01-02	0.989401	increase	num_connected_components (0.504); total_area (0.475); num_merges (0.466)
Helge	2020-06-17	1.28736	decrease	num_connected_components (0.504); total_area (0.475); num_merges (0.466)
Helge	2021-02-12	1.74878	increase	num_connected_components (0.504); total_area (0.475); num_merges (0.466)
Helge	2021-06-30	2.04323	decrease	num_connected_components (0.504); total_area (0.475); num_merges (0.466)
Helge	2021-11-10	1.39745	increase	num_connected_components (0.504); total_area (0.475); num_merges (0.466)
Helge	2022-05-20	2.02209	decrease	num_connected_components (0.504); total_area (0.475); num_merges (0.466)
Helge	2023-01-03	0.75144	increase	num_connected_components (0.504); total_area (0.475); num_merges (0.466)
Helge	2023-07-26	-0.574086	decrease	num_connected_components (0.504); total_area (0.475); num_merges (0.466)
Helge	2023-10-25	-0.486061	increase	num_connected_components (0.504); total_area (0.475); num_merges (0.466)
Helge	2024-04-27	-1.07104	decrease	num_connected_components (0.504); total_area (0.475); num_merges (0.466)
Hortobagy	2016-03-03	0.339275	decrease	num_connected_components (0.645); num_merges (0.450); persistent_components (0.366)
Hortobagy	2017-06-08	-0.0201871	decrease	num_connected_components (0.645); num_merges (0.450); persistent_components (0.366)
Hortobagy	2019-07-10	-0.159864	decrease	num_connected_components (0.645); num_merges (0.450); persistent_components (0.366)
Hortobagy	2020-01-18	0.104693	increase	num_connected_components (0.645); num_merges (0.450); persistent_components (0.366)
Hortobagy	2021-02-23	0.275146	increase	num_connected_components (0.645); num_merges (0.450); persistent_components (0.366)
Hortobagy	2021-06-23	-0.343791	decrease	num_connected_components (0.645); num_merges (0.450); persistent_components (0.366)
Hortobagy	2023-02-19	0.196768	increase	num_connected_components (0.645); num_merges (0.450); persistent_components (0.366)
Hortobagy	2023-10-17	-0.367353	decrease	num_connected_components (0.645); num_merges (0.450); persistent_components (0.366)
Hortobagy	2024-09-17	-2.29517	decrease	num_connected_components (0.645); num_merges (0.450); persistent_components (0.366)
Hovranomradet	2015-07-08	0.722168	decrease	num_connected_components (0.527); num_merges (0.476); total_area (0.475)
Hovranomradet	2016-12-24	1.09847	increase	num_connected_components (0.527); num_merges (0.476); total_area (0.475)
Hovranomradet	2017-01-22	4.4382	increase	num_connected_components (0.527); num_merges (0.476); total_area (0.475)
Hovranomradet	2017-03-23	4.40195	decrease	num_connected_components (0.527); num_merges (0.476); total_area (0.475)
Hovranomradet	2017-07-15	0.849343	decrease	num_connected_components (0.527); num_merges (0.476); total_area (0.475)
Hovranomradet	2018-01-05	1.12051	increase	num_connected_components (0.527); num_merges (0.476); total_area (0.475)
Hovranomradet	2018-04-06	2.63482	decrease	num_connected_components (0.527); num_merges (0.476); total_area (0.475)
Hovranomradet	2018-06-28	-0.479424	decrease	num_connected_components (0.527); num_merges (0.476); total_area (0.475)
Hovranomradet	2019-01-12	4.26491	increase	num_connected_components (0.527); num_merges (0.476); total_area (0.475)
Hovranomradet	2019-04-06	0.670926	decrease	num_connected_components (0.527); num_merges (0.476); total_area (0.475)
Hovranomradet	2020-05-19	0.117817	increase	num_connected_components (0.527); num_merges (0.476); total_area (0.475)
Hovranomradet	2020-06-18	-0.504131	decrease	num_connected_components (0.527); num_merges (0.476); total_area (0.475)
Hovranomradet	2020-11-08	0.364776	increase	num_connected_components (0.527); num_merges (0.476); total_area (0.475)
Hovranomradet	2021-06-19	0.780521	decrease	num_connected_components (0.527); num_merges (0.476); total_area (0.475)
Hovranomradet	2021-12-22	1.74107	increase	num_connected_components (0.527); num_merges (0.476); total_area (0.475)
Hovranomradet	2022-04-09	1.25454	decrease	num_connected_components (0.527); num_merges (0.476); total_area (0.475)
Hovranomradet	2022-12-10	0.746078	increase	num_connected_components (0.527); num_merges (0.476); total_area (0.475)
Hovranomradet	2023-04-21	1.55507	decrease	num_connected_components (0.527); num_merges (0.476); total_area (0.475)
Hovranomradet	2023-07-21	-1.0579	decrease	num_connected_components (0.527); num_merges (0.476); total_area (0.475)
Hovranomradet	2023-12-17	-0.179677	increase	num_connected_components (0.527); num_merges (0.476); total_area (0.475)
Hovranomradet	2024-05-21	-0.149535	decrease	num_connected_components (0.527); num_merges (0.476); total_area (0.475)
Hutovo	2015-07-24	0.781747	decrease	num_connected_components (0.531); total_area (0.489); num_merges (0.445)
Hutovo	2017-12-22	2.25195	increase	num_connected_components (0.531); total_area (0.489); num_merges (0.445)
Hutovo	2018-05-21	0.513796	decrease	num_connected_components (0.531); total_area (0.489); num_merges (0.445)
Hutovo	2018-11-29	1.17184	increase	num_connected_components (0.531); total_area (0.489); num_merges (0.445)
Hutovo	2019-03-29	2.00629	increase	num_connected_components (0.531); total_area (0.489); num_merges (0.445)
Hutovo	2019-06-27	0.0302885	decrease	num_connected_components (0.531); total_area (0.489); num_merges (0.445)
Hutovo	2019-10-25	-1.35606	increase	num_connected_components (0.531); total_area (0.489); num_merges (0.445)
Hutovo	2019-11-30	4.35048	increase	num_connected_components (0.531); total_area (0.489); num_merges (0.445)
Hutovo	2020-01-29	0.398741	decrease	num_connected_components (0.531); total_area (0.489); num_merges (0.445)
Hutovo	2020-04-28	-0.754143	decrease	num_connected_components (0.531); total_area (0.489); num_merges (0.445)
Hutovo	2020-11-30	-0.708978	increase	num_connected_components (0.531); total_area (0.489); num_merges (0.445)
Hutovo	2021-04-29	0.786066	decrease	num_connected_components (0.531); total_area (0.489); num_merges (0.445)
Hutovo	2021-11-01	0.394345	increase	num_connected_components (0.531); total_area (0.489); num_merges (0.445)
Hutovo	2022-02-05	-0.220047	decrease	num_connected_components (0.531); total_area (0.489); num_merges (0.445)
Hutovo	2023-06-24	-1.01655	decrease	num_connected_components (0.531); total_area (0.489); num_merges (0.445)
Jijia	2016-02-29	-0.180097	increase	num_connected_components (0.666); num_fragmentations (0.452); total_area (-0.353)
Jijia	2017-03-07	2.71691	increase	num_connected_components (0.666); num_fragmentations (0.452); total_area (-0.353)
Jijia	2017-06-05	0.529188	decrease	num_connected_components (0.666); num_fragmentations (0.452); total_area (-0.353)
Jijia	2018-03-08	-0.535829	increase	num_connected_components (0.666); num_fragmentations (0.452); total_area (-0.353)
Jijia	2019-03-09	2.01278	increase	num_connected_components (0.666); num_fragmentations (0.452); total_area (-0.353)
Jijia	2019-06-13	-0.459552	decrease	num_connected_components (0.666); num_fragmentations (0.452); total_area (-0.353)
Jijia	2020-01-15	-1.35354	decrease	num_connected_components (0.666); num_fragmentations (0.452); total_area (-0.353)
Jijia	2020-05-20	-1.98352	decrease	num_connected_components (0.666); num_fragmentations (0.452); total_area (-0.353)
Jijia	2021-09-18	-0.114333	decrease	num_connected_components (0.666); num_fragmentations (0.452); total_area (-0.353)
Jijia	2023-04-29	2.97544	increase	num_connected_components (0.666); num_fragmentations (0.452); total_area (-0.353)
Kiskunsag	2017-05-08	-0.986491	increase	num_connected_components (0.475); total_area (0.448); num_merges (0.437)
Kiskunsag	2017-08-24	1.51508	decrease	num_connected_components (0.475); total_area (0.448); num_merges (0.437)
Kiskunsag	2020-04-22	0.0943648	increase	num_connected_components (0.475); total_area (0.448); num_merges (0.437)
Kiskunsag	2020-10-25	-1.51842	decrease	num_connected_components (0.475); total_area (0.448); num_merges (0.437)
Kiskunsag	2021-06-28	3.71105	increase	num_connected_components (0.475); total_area (0.448); num_merges (0.437)
Kiskunsag	2021-09-26	2.10138	decrease	num_connected_components (0.475); total_area (0.448); num_merges (0.437)
Kiskunsag	2023-09-04	-1.03473	decrease	num_connected_components (0.475); total_area (0.448); num_merges (0.437)
Kiskunsag	2024-01-02	2.97137	increase	num_connected_components (0.475); total_area (0.448); num_merges (0.437)
Kiskunsag	2024-03-02	1.24024	decrease	num_connected_components (0.475); total_area (0.448); num_merges (0.437)
Koitelainen	2015-05-25	-0.468422	decrease	num_connected_components (0.476); persistent_components (0.463); num_merges (0.457)
Koitelainen	2015-10-28	-0.540193	increase	num_connected_components (0.476); persistent_components (0.463); num_merges (0.457)
Koitelainen	2017-06-01	1.0291	decrease	num_connected_components (0.476); persistent_components (0.463); num_merges (0.457)
Koitelainen	2017-11-04	0.854189	increase	num_connected_components (0.476); persistent_components (0.463); num_merges (0.457)
Koitelainen	2018-05-15	-0.723865	decrease	num_connected_components (0.476); persistent_components (0.463); num_merges (0.457)
Koitelainen	2018-12-05	2.0551	increase	num_connected_components (0.476); persistent_components (0.463); num_merges (0.457)
Koitelainen	2019-05-17	-1.55643	decrease	num_connected_components (0.476); persistent_components (0.463); num_merges (0.457)
Koitelainen	2019-11-24	-0.531664	increase	num_connected_components (0.476); persistent_components (0.463); num_merges (0.457)
Koitelainen	2020-06-04	-0.340643	decrease	num_connected_components (0.476); persistent_components (0.463); num_merges (0.457)
Koitelainen	2020-11-12	0.259211	increase	num_connected_components (0.476); persistent_components (0.463); num_merges (0.457)
Koitelainen	2021-06-04	-1.94356	decrease	num_connected_components (0.476); persistent_components (0.463); num_merges (0.457)
Koitelainen	2021-10-14	0.354177	increase	num_connected_components (0.476); persistent_components (0.463); num_merges (0.457)
Koitelainen	2022-06-17	-1.90852	decrease	num_connected_components (0.476); persistent_components (0.463); num_merges (0.457)
Koitelainen	2022-12-26	2.40512	increase	num_connected_components (0.476); persistent_components (0.463); num_merges (0.457)
Koitelainen	2023-04-25	1.95097	decrease	num_connected_components (0.476); persistent_components (0.463); num_merges (0.457)
Koitelainen	2024-01-02	2.45802	increase	num_connected_components (0.476); persistent_components (0.463); num_merges (0.457)
Koitelainen	2024-05-01	1.31311	decrease	num_connected_components (0.476); persistent_components (0.463); num_merges (0.457)
Kopacki	2016-12-21	1.1562	increase	num_connected_components (0.490); total_area (0.448); num_merges (0.438)
Kopacki	2017-02-19	0.297964	decrease	num_connected_components (0.490); total_area (0.448); num_merges (0.438)
Kopacki	2017-06-25	-1.535	decrease	num_connected_components (0.490); total_area (0.448); num_merges (0.438)
Kopacki	2019-03-05	-0.221924	increase	num_connected_components (0.490); total_area (0.448); num_merges (0.438)
Kopacki	2019-07-09	-0.609277	decrease	num_connected_components (0.490); total_area (0.448); num_merges (0.438)
Kopacki	2020-01-23	-0.200169	increase	num_connected_components (0.490); total_area (0.448); num_merges (0.438)
Kopacki	2020-06-15	-1.37737	decrease	num_connected_components (0.490); total_area (0.448); num_merges (0.438)
Kopacki	2021-02-16	1.35634	increase	num_connected_components (0.490); total_area (0.448); num_merges (0.438)
Kopacki	2021-06-22	-0.236749	decrease	num_connected_components (0.490); total_area (0.448); num_merges (0.438)
Kopacki	2021-12-13	1.79618	increase	num_connected_components (0.490); total_area (0.448); num_merges (0.438)
Kopacki	2023-06-24	1.08393	decrease	num_connected_components (0.490); total_area (0.448); num_merges (0.438)
Kozyansky	2015-09-26	-0.872111	increase	num_connected_components (0.487); persistent_components (0.448); total_area (0.431)
Kozyansky	2016-04-29	1.7175	decrease	num_connected_components (0.487); persistent_components (0.448); total_area (0.431)
Kozyansky	2016-11-19	-0.846502	increase	num_connected_components (0.487); persistent_components (0.448); total_area (0.431)
Kozyansky	2017-12-08	-0.0882144	decrease	num_connected_components (0.487); persistent_components (0.448); total_area (0.431)
Kozyansky	2018-04-24	-0.0747577	decrease	num_connected_components (0.487); persistent_components (0.448); total_area (0.431)
Kozyansky	2018-12-03	1.63078	increase	num_connected_components (0.487); persistent_components (0.448); total_area (0.431)
Kozyansky	2019-04-25	-1.17375	decrease	num_connected_components (0.487); persistent_components (0.448); total_area (0.431)
Kozyansky	2020-03-14	1.0769	increase	num_connected_components (0.487); persistent_components (0.448); total_area (0.431)
Kozyansky	2020-05-01	0.317024	decrease	num_connected_components (0.487); persistent_components (0.448); total_area (0.431)
Kozyansky	2021-01-02	2.92206	increase	num_connected_components (0.487); persistent_components (0.448); total_area (0.431)
Kozyansky	2021-04-14	0.692334	decrease	num_connected_components (0.487); persistent_components (0.448); total_area (0.431)
Kozyansky	2021-12-11	1.22436	increase	num_connected_components (0.487); persistent_components (0.448); total_area (0.431)
Kozyansky	2022-06-02	-1.18937	decrease	num_connected_components (0.487); persistent_components (0.448); total_area (0.431)
Kozyansky	2022-10-31	0.999002	increase	num_connected_components (0.487); persistent_components (0.448); total_area (0.431)
Kozyansky	2023-07-22	0.814107	decrease	num_connected_components (0.487); persistent_components (0.448); total_area (0.431)
Kozyansky	2023-11-19	-0.986473	increase	num_connected_components (0.487); persistent_components (0.448); total_area (0.431)
Kozyansky	2024-03-23	-1.52481	decrease	num_connected_components (0.487); persistent_components (0.448); total_area (0.431)
Kvisleflaet	2016-05-25	-2.18416	decrease	num_merges (0.526); num_connected_components (0.494); total_area (0.492)
Kvisleflaet	2016-10-04	-0.255057	increase	num_merges (0.526); num_connected_components (0.494); total_area (0.492)
Kvisleflaet	2017-05-15	-2.20186	decrease	num_merges (0.526); num_connected_components (0.494); total_area (0.492)
Kvisleflaet	2017-10-11	-0.408632	increase	num_merges (0.526); num_connected_components (0.494); total_area (0.492)
Kvisleflaet	2018-04-15	1.25632	decrease	num_merges (0.526); num_connected_components (0.494); total_area (0.492)
Kvisleflaet	2018-10-07	0.0920251	increase	num_merges (0.526); num_connected_components (0.494); total_area (0.492)
Kvisleflaet	2019-05-04	1.24464	decrease	num_merges (0.526); num_connected_components (0.494); total_area (0.492)
Kvisleflaet	2019-11-30	1.20727	increase	num_merges (0.526); num_connected_components (0.494); total_area (0.492)
Kvisleflaet	2020-05-22	-0.934793	decrease	num_merges (0.526); num_connected_components (0.494); total_area (0.492)
Kvisleflaet	2020-11-01	-0.175603	decrease	num_merges (0.526); num_connected_components (0.494); total_area (0.492)
Kvisleflaet	2021-05-11	0.96429	decrease	num_merges (0.526); num_connected_components (0.494); total_area (0.492)
Kvisleflaet	2021-09-20	0.319866	increase	num_merges (0.526); num_connected_components (0.494); total_area (0.492)
Kvisleflaet	2023-11-21	2.20964	increase	num_merges (0.526); num_connected_components (0.494); total_area (0.492)
Kvisleflaet	2024-04-01	1.62947	decrease	num_merges (0.526); num_connected_components (0.494); total_area (0.492)
Kvisleflaet	2024-10-10	-1.1967	increase	num_merges (0.526); num_connected_components (0.494); total_area (0.492)
Lataseno	2015-05-18	-0.266294	decrease	num_connected_components (0.465); num_merges (0.447); num_fragmentations (0.428)
Lataseno	2016-01-11	1.77419	increase	num_connected_components (0.465); num_merges (0.447); num_fragmentations (0.428)
Lataseno	2016-05-10	0.774963	decrease	num_connected_components (0.465); num_merges (0.447); num_fragmentations (0.428)
Lataseno	2016-11-18	-0.24908	increase	num_connected_components (0.465); num_merges (0.447); num_fragmentations (0.428)
Lataseno	2017-06-04	-0.409828	decrease	num_connected_components (0.465); num_merges (0.447); num_fragmentations (0.428)
Lataseno	2017-11-21	-0.570429	increase	num_connected_components (0.465); num_merges (0.447); num_fragmentations (0.428)
Lataseno	2018-05-08	-0.198759	decrease	num_connected_components (0.465); num_merges (0.447); num_fragmentations (0.428)
Lataseno	2018-12-04	-0.780419	increase	num_connected_components (0.465); num_merges (0.447); num_fragmentations (0.428)
Lataseno	2019-05-21	-2.24784	decrease	num_connected_components (0.465); num_merges (0.447); num_fragmentations (0.428)
Lataseno	2019-11-05	1.24643	increase	num_connected_components (0.465); num_merges (0.447); num_fragmentations (0.428)
Lataseno	2020-06-08	-1.39348	decrease	num_connected_components (0.465); num_merges (0.447); num_fragmentations (0.428)
Lataseno	2020-11-29	-0.324379	increase	num_connected_components (0.465); num_merges (0.447); num_fragmentations (0.428)
Lataseno	2021-06-09	-2.25025	decrease	num_connected_components (0.465); num_merges (0.447); num_fragmentations (0.428)
Lataseno	2021-11-12	0.427942	increase	num_connected_components (0.465); num_merges (0.447); num_fragmentations (0.428)
Lataseno	2022-06-22	-2.16908	decrease	num_connected_components (0.465); num_merges (0.447); num_fragmentations (0.428)
Lataseno	2022-12-19	2.08234	increase	num_connected_components (0.465); num_merges (0.447); num_fragmentations (0.428)
Lataseno	2023-04-30	0.626882	decrease	num_connected_components (0.465); num_merges (0.447); num_fragmentations (0.428)
Lataseno	2023-11-08	-0.180928	increase	num_connected_components (0.465); num_merges (0.447); num_fragmentations (0.428)
Lataseno	2024-05-06	-0.0752513	decrease	num_connected_components (0.465); num_merges (0.447); num_fragmentations (0.428)
Lough_erne	2015-06-16	0.700367	decrease	num_new_components (0.590); total_area (0.515); num_merges (0.416)
Lough_erne	2015-11-14	2.1025	increase	num_new_components (0.590); total_area (0.515); num_merges (0.416)
Lough_erne	2016-02-23	0.130223	decrease	num_new_components (0.590); total_area (0.515); num_merges (0.416)
Lough_erne	2016-07-23	-0.53547	decrease	num_new_components (0.590); total_area (0.515); num_merges (0.416)
Lough_erne	2017-02-17	-1.00099	increase	num_new_components (0.590); total_area (0.515); num_merges (0.416)
Lough_erne	2017-07-17	-0.442829	decrease	num_new_components (0.590); total_area (0.515); num_merges (0.416)
Lough_erne	2017-12-27	1.65066	increase	num_new_components (0.590); total_area (0.515); num_merges (0.416)
Lough_erne	2018-03-08	0.46884	decrease	num_new_components (0.590); total_area (0.515); num_merges (0.416)
Lough_erne	2018-06-24	-1.05466	decrease	num_new_components (0.590); total_area (0.515); num_merges (0.416)
Lough_erne	2018-12-10	-0.105605	increase	num_new_components (0.590); total_area (0.515); num_merges (0.416)
Lough_erne	2019-03-04	0.781589	increase	num_new_components (0.590); total_area (0.515); num_merges (0.416)
Lough_erne	2019-03-22	1.31274	decrease	num_new_components (0.590); total_area (0.515); num_merges (0.416)
Lough_erne	2020-02-15	3.18311	increase	num_new_components (0.590); total_area (0.515); num_merges (0.416)
Lough_erne	2020-03-16	0.797803	decrease	num_new_components (0.590); total_area (0.515); num_merges (0.416)
Lough_erne	2020-07-14	0.528164	decrease	num_new_components (0.590); total_area (0.515); num_merges (0.416)
Lough_erne	2020-10-30	0.220243	increase	num_new_components (0.590); total_area (0.515); num_merges (0.416)
Lough_erne	2021-02-21	1.17944	increase	num_new_components (0.590); total_area (0.515); num_merges (0.416)
Lough_erne	2021-09-07	-0.611628	decrease	num_new_components (0.590); total_area (0.515); num_merges (0.416)
Lough_erne	2021-12-05	1.06869	increase	num_new_components (0.590); total_area (0.515); num_merges (0.416)
Lough_erne	2022-06-15	0.952845	decrease	num_new_components (0.590); total_area (0.515); num_merges (0.416)
Lough_erne	2024-06-04	-0.628131	decrease	num_new_components (0.590); total_area (0.515); num_merges (0.416)
Lubana	2016-10-18	4.47692	increase	num_connected_components (0.541); total_area (0.498); num_merges (0.456)
Lubana	2016-10-31	-1.25506	decrease	num_connected_components (0.541); total_area (0.498); num_merges (0.456)
Lubana	2017-01-11	1.21577	increase	num_connected_components (0.541); total_area (0.498); num_merges (0.456)
Lubana	2017-02-09	1.44677	decrease	num_connected_components (0.541); total_area (0.498); num_merges (0.456)
Lubana	2018-01-24	0.891877	increase	num_connected_components (0.541); total_area (0.498); num_merges (0.456)
Lubana	2018-03-12	3.70012	decrease	num_connected_components (0.541); total_area (0.498); num_merges (0.456)
Lubana	2019-02-11	4.63769	increase	num_connected_components (0.541); total_area (0.498); num_merges (0.456)
Lubana	2019-03-07	1.95703	decrease	num_connected_components (0.541); total_area (0.498); num_merges (0.456)
Lubana	2020-03-20	3.19487	increase	num_connected_components (0.541); total_area (0.498); num_merges (0.456)
Lubana	2020-04-18	0.512303	decrease	num_connected_components (0.541); total_area (0.498); num_merges (0.456)
Lubana	2020-06-29	0.0883783	decrease	num_connected_components (0.541); total_area (0.498); num_merges (0.456)
Lubana	2021-01-26	2.48629	increase	num_connected_components (0.541); total_area (0.498); num_merges (0.456)
Lubana	2021-04-20	-0.0442747	decrease	num_connected_components (0.541); total_area (0.498); num_merges (0.456)
Lubana	2021-11-15	1.52365	increase	num_connected_components (0.541); total_area (0.498); num_merges (0.456)
Lubana	2022-04-20	0.796099	decrease	num_connected_components (0.541); total_area (0.498); num_merges (0.456)
Lubana	2022-07-20	-0.557933	decrease	num_connected_components (0.541); total_area (0.498); num_merges (0.456)
Lubana	2022-12-16	2.08825	increase	num_connected_components (0.541); total_area (0.498); num_merges (0.456)
Lubana	2023-05-04	0.289402	decrease	num_connected_components (0.541); total_area (0.498); num_merges (0.456)
Lubana	2023-12-30	-0.322149	increase	num_connected_components (0.541); total_area (0.498); num_merges (0.456)
Lubana	2024-03-28	1.05186	decrease	num_connected_components (0.541); total_area (0.498); num_merges (0.456)
Martimoaapa	2015-10-04	2.4821	increase	num_merges (0.523); num_fragmentations (0.483); persistent_components (0.481)
Martimoaapa	2015-11-09	0.849117	decrease	num_merges (0.523); num_fragmentations (0.483); persistent_components (0.481)
Martimoaapa	2016-06-07	-1.45929	decrease	num_merges (0.523); num_fragmentations (0.483); persistent_components (0.481)
Martimoaapa	2016-08-18	-1.05822	increase	num_merges (0.523); num_fragmentations (0.483); persistent_components (0.481)
Martimoaapa	2017-05-09	0.49658	increase	num_merges (0.523); num_fragmentations (0.483); persistent_components (0.481)
Martimoaapa	2017-05-31	-0.496923	decrease	num_merges (0.523); num_fragmentations (0.483); persistent_components (0.481)
Martimoaapa	2017-07-14	-2.11583	decrease	num_merges (0.523); num_fragmentations (0.483); persistent_components (0.481)
Martimoaapa	2017-10-17	1.72067	decrease	num_merges (0.523); num_fragmentations (0.483); persistent_components (0.481)
Martimoaapa	2017-11-17	0.93412	decrease	num_merges (0.523); num_fragmentations (0.483); persistent_components (0.481)
Martimoaapa	2018-05-02	-0.139137	increase	num_merges (0.523); num_fragmentations (0.483); persistent_components (0.481)
Martimoaapa	2018-07-13	0.154553	increase	num_merges (0.523); num_fragmentations (0.483); persistent_components (0.481)
Martimoaapa	2018-10-12	0.0388714	decrease	num_merges (0.523); num_fragmentations (0.483); persistent_components (0.481)
Martimoaapa	2019-06-14	-0.865381	decrease	num_merges (0.523); num_fragmentations (0.483); persistent_components (0.481)
Martimoaapa	2019-07-28	-1.11116	increase	num_merges (0.523); num_fragmentations (0.483); persistent_components (0.481)
Martimoaapa	2019-08-13	-0.136225	decrease	num_merges (0.523); num_fragmentations (0.483); persistent_components (0.481)
Martimoaapa	2019-09-13	-0.0959873	increase	num_merges (0.523); num_fragmentations (0.483); persistent_components (0.481)
Martimoaapa	2020-05-29	-0.92572	decrease	num_merges (0.523); num_fragmentations (0.483); persistent_components (0.481)
Martimoaapa	2020-08-31	0.650131	increase	num_merges (0.523); num_fragmentations (0.483); persistent_components (0.481)
Martimoaapa	2020-09-19	2.114	decrease	num_merges (0.523); num_fragmentations (0.483); persistent_components (0.481)
Martimoaapa	2021-05-22	-0.955082	decrease	num_merges (0.523); num_fragmentations (0.483); persistent_components (0.481)
Martimoaapa	2021-07-10	-1.02189	increase	num_merges (0.523); num_fragmentations (0.483); persistent_components (0.481)
Martimoaapa	2021-10-31	0.35219	decrease	num_merges (0.523); num_fragmentations (0.483); persistent_components (0.481)
Martimoaapa	2022-06-22	0.698827	increase	num_merges (0.523); num_fragmentations (0.483); persistent_components (0.481)
Martimoaapa	2022-11-13	0.618718	decrease	num_merges (0.523); num_fragmentations (0.483); persistent_components (0.481)
Martimoaapa	2023-06-29	-0.991794	increase	num_merges (0.523); num_fragmentations (0.483); persistent_components (0.481)
Martimoaapa	2023-08-11	-1.93093	decrease	num_merges (0.523); num_fragmentations (0.483); persistent_components (0.481)
Martimoaapa	2023-09-21	-0.6869	increase	num_merges (0.523); num_fragmentations (0.483); persistent_components (0.481)
Martimoaapa	2024-05-30	-1.81589	decrease	num_merges (0.523); num_fragmentations (0.483); persistent_components (0.481)
Martimoaapa	2024-09-27	-0.89554	increase	num_merges (0.523); num_fragmentations (0.483); persistent_components (0.481)
Muraka	2015-03-16	0.656094	increase	num_fragmentations (0.557); total_area (-0.485); num_connected_components (0.485)
Muraka	2015-12-17	-0.374464	decrease	num_fragmentations (0.557); total_area (-0.485); num_connected_components (0.485)
Muraka	2016-03-22	0.147966	decrease	num_fragmentations (0.557); total_area (-0.485); num_connected_components (0.485)
Muraka	2016-11-24	-0.542802	increase	num_fragmentations (0.557); total_area (-0.485); num_connected_components (0.485)
Muraka	2017-04-29	0.57505	increase	num_fragmentations (0.557); total_area (-0.485); num_connected_components (0.485)
Muraka	2017-10-20	-0.410119	decrease	num_fragmentations (0.557); total_area (-0.485); num_connected_components (0.485)
Muraka	2018-12-25	-1.23344	decrease	num_fragmentations (0.557); total_area (-0.485); num_connected_components (0.485)
Muraka	2019-03-02	-0.141582	increase	num_fragmentations (0.557); total_area (-0.485); num_connected_components (0.485)
Muraka	2020-02-18	0.0617177	decrease	num_fragmentations (0.557); total_area (-0.485); num_connected_components (0.485)
Muraka	2020-04-06	0.200618	increase	num_fragmentations (0.557); total_area (-0.485); num_connected_components (0.485)
Muraka	2020-12-09	-2.29495	decrease	num_fragmentations (0.557); total_area (-0.485); num_connected_components (0.485)
Muraka	2021-02-07	-0.625897	increase	num_fragmentations (0.557); total_area (-0.485); num_connected_components (0.485)
Muraka	2021-10-22	0.810635	decrease	num_fragmentations (0.557); total_area (-0.485); num_connected_components (0.485)
Muraka	2022-05-02	1.71995	increase	num_fragmentations (0.557); total_area (-0.485); num_connected_components (0.485)
Muraka	2023-10-12	0.776591	increase	num_fragmentations (0.557); total_area (-0.485); num_connected_components (0.485)
Muraka	2024-04-04	-1.72513	increase	num_fragmentations (0.557); total_area (-0.485); num_connected_components (0.485)
Neretva	2015-06-18	1.80759	increase	num_connected_components (0.535); total_area (0.512); num_new_components (0.420)
Neretva	2016-05-19	-0.921412	decrease	num_connected_components (0.535); total_area (0.512); num_new_components (0.420)
Neretva	2016-12-27	0.423984	increase	num_connected_components (0.535); total_area (0.512); num_new_components (0.420)
Neretva	2017-05-02	-0.613218	decrease	num_connected_components (0.535); total_area (0.512); num_new_components (0.420)
Neretva	2017-11-28	0.640907	increase	num_connected_components (0.535); total_area (0.512); num_new_components (0.420)
Neretva	2018-05-03	-1.54092	decrease	num_connected_components (0.535); total_area (0.512); num_new_components (0.420)
Neretva	2018-11-11	-1.24126	increase	num_connected_components (0.535); total_area (0.512); num_new_components (0.420)
Neretva	2019-06-09	-1.26458	decrease	num_connected_components (0.535); total_area (0.512); num_new_components (0.420)
Neretva	2019-11-06	0.0730081	increase	num_connected_components (0.535); total_area (0.512); num_new_components (0.420)
Neretva	2020-01-11	0.322777	decrease	num_connected_components (0.535); total_area (0.512); num_new_components (0.420)
Neretva	2020-12-12	2.5624	increase	num_connected_components (0.535); total_area (0.512); num_new_components (0.420)
Neretva	2021-04-11	1.32977	increase	num_connected_components (0.535); total_area (0.512); num_new_components (0.420)
Neretva	2021-12-07	4.81189	increase	num_connected_components (0.535); total_area (0.512); num_new_components (0.420)
Neretva	2022-02-05	0.524565	decrease	num_connected_components (0.535); total_area (0.512); num_new_components (0.420)
Neretva	2023-06-24	-1.42919	decrease	num_connected_components (0.535); total_area (0.512); num_new_components (0.420)
Olvassuo	2015-05-27	-0.472739	decrease	persistent_components (0.483); num_merges (0.469); total_area (0.461)
Olvassuo	2015-10-06	0.66571	increase	persistent_components (0.483); num_merges (0.469); total_area (0.461)
Olvassuo	2016-04-25	1.25475	decrease	persistent_components (0.483); num_merges (0.469); total_area (0.461)
Olvassuo	2016-11-05	-1.38543	increase	persistent_components (0.483); num_merges (0.469); total_area (0.461)
Olvassuo	2017-06-02	-0.802148	decrease	persistent_components (0.483); num_merges (0.469); total_area (0.461)
Olvassuo	2017-12-16	2.21118	increase	persistent_components (0.483); num_merges (0.469); total_area (0.461)
Olvassuo	2018-05-16	-1.45033	decrease	persistent_components (0.483); num_merges (0.469); total_area (0.461)
Olvassuo	2018-11-25	1.44867	increase	persistent_components (0.483); num_merges (0.469); total_area (0.461)
Olvassuo	2019-04-17	0.453707	decrease	persistent_components (0.483); num_merges (0.469); total_area (0.461)
Olvassuo	2019-11-19	0.895912	increase	persistent_components (0.483); num_merges (0.469); total_area (0.461)
Olvassuo	2020-05-22	-1.19971	decrease	persistent_components (0.483); num_merges (0.469); total_area (0.461)
Olvassuo	2020-11-30	0.794617	increase	persistent_components (0.483); num_merges (0.469); total_area (0.461)
Olvassuo	2021-05-13	-1.49745	decrease	persistent_components (0.483); num_merges (0.469); total_area (0.461)
Olvassuo	2021-11-08	0.956337	increase	persistent_components (0.483); num_merges (0.469); total_area (0.461)
Olvassuo	2022-05-07	2.14492	decrease	persistent_components (0.483); num_merges (0.469); total_area (0.461)
Olvassuo	2022-11-15	-0.724157	increase	persistent_components (0.483); num_merges (0.469); total_area (0.461)
Olvassuo	2023-04-13	1.22753	decrease	persistent_components (0.483); num_merges (0.469); total_area (0.461)
Olvassuo	2023-11-03	0.401812	increase	persistent_components (0.483); num_merges (0.469); total_area (0.461)
Osveiski	2015-04-28	-0.252325	decrease	num_connected_components (0.512); total_area (0.435); persistent_components (0.434)
Osveiski	2015-08-02	-0.612206	decrease	num_connected_components (0.512); total_area (0.435); persistent_components (0.434)
Osveiski	2017-01-29	0.413637	increase	num_connected_components (0.512); total_area (0.435); persistent_components (0.434)
Osveiski	2017-04-12	-0.509929	decrease	num_connected_components (0.512); total_area (0.435); persistent_components (0.434)
Osveiski	2018-01-25	0.455989	increase	num_connected_components (0.512); total_area (0.435); persistent_components (0.434)
Osveiski	2018-03-31	-0.693594	decrease	num_connected_components (0.512); total_area (0.435); persistent_components (0.434)
Osveiski	2019-01-19	1.67436	increase	num_connected_components (0.512); total_area (0.435); persistent_components (0.434)
Osveiski	2019-03-21	-0.735886	decrease	num_connected_components (0.512); total_area (0.435); persistent_components (0.434)
Osveiski	2021-11-29	-0.661314	increase	num_connected_components (0.512); total_area (0.435); persistent_components (0.434)
Osveiski	2022-05-04	0.701997	decrease	num_connected_components (0.512); total_area (0.435); persistent_components (0.434)
Osveiski	2022-12-30	2.42059	increase	num_connected_components (0.512); total_area (0.435); persistent_components (0.434)
Osveiski	2023-03-12	4.41678	decrease	num_connected_components (0.512); total_area (0.435); persistent_components (0.434)
Ovre_forra	2016-05-01	1.17794	decrease	num_merges (0.466); num_connected_components (0.451); persistent_components (0.445)
Ovre_forra	2016-10-09	-0.608871	increase	num_merges (0.466); num_connected_components (0.451); persistent_components (0.445)
Ovre_forra	2017-05-20	-0.744022	decrease	num_merges (0.466); num_connected_components (0.451); persistent_components (0.445)
Ovre_forra	2017-09-23	-1.38687	increase	num_merges (0.466); num_connected_components (0.451); persistent_components (0.445)
Ovre_forra	2017-12-09	1.88803	increase	num_merges (0.466); num_connected_components (0.451); persistent_components (0.445)
Ovre_forra	2018-04-27	1.32469	decrease	num_merges (0.466); num_connected_components (0.451); persistent_components (0.445)
Ovre_forra	2018-12-05	0.199277	increase	num_merges (0.466); num_connected_components (0.451); persistent_components (0.445)
Ovre_forra	2019-04-21	1.02182	decrease	num_merges (0.466); num_connected_components (0.451); persistent_components (0.445)
Ovre_forra	2019-11-18	1.73515	increase	num_merges (0.466); num_connected_components (0.451); persistent_components (0.445)
Ovre_forra	2020-06-08	-0.55807	decrease	num_merges (0.466); num_connected_components (0.451); persistent_components (0.445)
Ovre_forra	2020-09-19	1.5863	increase	num_merges (0.466); num_connected_components (0.451); persistent_components (0.445)
Ovre_forra	2020-11-23	-0.331005	increase	num_merges (0.466); num_connected_components (0.451); persistent_components (0.445)
Ovre_forra	2021-05-29	-1.82805	decrease	num_merges (0.466); num_connected_components (0.451); persistent_components (0.445)
Ovre_forra	2021-07-21	1.00405	increase	num_merges (0.466); num_connected_components (0.451); persistent_components (0.445)
Ovre_forra	2021-11-30	1.70287	increase	num_merges (0.466); num_connected_components (0.451); persistent_components (0.445)
Ovre_forra	2022-05-23	0.54917	decrease	num_merges (0.466); num_connected_components (0.451); persistent_components (0.445)
Ovre_forra	2022-12-01	1.83392	increase	num_merges (0.466); num_connected_components (0.451); persistent_components (0.445)
Ovre_forra	2023-05-25	-0.359303	decrease	num_merges (0.466); num_connected_components (0.451); persistent_components (0.445)
Ovre_forra	2023-11-14	1.8226	increase	num_merges (0.466); num_connected_components (0.451); persistent_components (0.445)
Ovre_forra	2024-05-12	-1.76191	decrease	num_merges (0.466); num_connected_components (0.451); persistent_components (0.445)
Oyeren	2015-05-31	-0.277191	decrease	num_connected_components (0.553); num_fragmentations (0.517); total_area (-0.517)
Oyeren	2017-02-02	1.63074	increase	num_connected_components (0.553); num_fragmentations (0.517); total_area (-0.517)
Oyeren	2017-03-21	2.55106	decrease	num_connected_components (0.553); num_fragmentations (0.517); total_area (-0.517)
Oyeren	2017-05-08	-0.147289	decrease	num_connected_components (0.553); num_fragmentations (0.517); total_area (-0.517)
Oyeren	2018-01-10	0.666369	increase	num_connected_components (0.553); num_fragmentations (0.517); total_area (-0.517)
Oyeren	2018-04-28	-0.0169087	decrease	num_connected_components (0.553); num_fragmentations (0.517); total_area (-0.517)
Oyeren	2018-12-12	0.0325453	increase	num_connected_components (0.553); num_fragmentations (0.517); total_area (-0.517)
Oyeren	2019-01-28	1.57326	increase	num_connected_components (0.553); num_fragmentations (0.517); total_area (-0.517)
Oyeren	2019-03-18	1.41871	decrease	num_connected_components (0.553); num_fragmentations (0.517); total_area (-0.517)
Oyeren	2019-05-04	-0.194238	decrease	num_connected_components (0.553); num_fragmentations (0.517); total_area (-0.517)
Oyeren	2020-03-29	0.0192759	increase	num_connected_components (0.553); num_fragmentations (0.517); total_area (-0.517)
Oyeren	2020-05-10	0.179066	decrease	num_connected_components (0.553); num_fragmentations (0.517); total_area (-0.517)
Oyeren	2021-01-29	0.105816	increase	num_connected_components (0.553); num_fragmentations (0.517); total_area (-0.517)
Oyeren	2021-05-11	-0.286985	decrease	num_connected_components (0.553); num_fragmentations (0.517); total_area (-0.517)
Oyeren	2021-12-20	0.542113	increase	num_connected_components (0.553); num_fragmentations (0.517); total_area (-0.517)
Oyeren	2022-05-01	0.866726	decrease	num_connected_components (0.553); num_fragmentations (0.517); total_area (-0.517)
Oyeren	2022-12-27	1.79445	increase	num_connected_components (0.553); num_fragmentations (0.517); total_area (-0.517)
Oyeren	2023-04-26	-0.317813	decrease	num_connected_components (0.553); num_fragmentations (0.517); total_area (-0.517)
Oyeren	2023-11-28	0.216141	increase	num_connected_components (0.553); num_fragmentations (0.517); total_area (-0.517)
Oyeren	2024-03-08	4.11422	increase	num_connected_components (0.553); num_fragmentations (0.517); total_area (-0.517)
Oyeren	2024-04-08	-0.15178	decrease	num_connected_components (0.553); num_fragmentations (0.517); total_area (-0.517)
Patvinsuo	2015-04-16	1.50463	decrease	num_connected_components (0.553); total_area (0.452); num_merges (0.439)
Patvinsuo	2016-12-24	2.37385	increase	num_connected_components (0.553); total_area (0.452); num_merges (0.439)
Patvinsuo	2017-05-29	-1.12342	decrease	num_connected_components (0.553); total_area (0.452); num_merges (0.439)
Patvinsuo	2018-01-18	1.48024	increase	num_connected_components (0.553); total_area (0.452); num_merges (0.439)
Patvinsuo	2018-04-24	1.39414	decrease	num_connected_components (0.553); total_area (0.452); num_merges (0.439)
Patvinsuo	2018-11-02	-1.65356	increase	num_connected_components (0.553); total_area (0.452); num_merges (0.439)
Patvinsuo	2019-05-13	-1.18288	decrease	num_connected_components (0.553); total_area (0.452); num_merges (0.439)
Patvinsuo	2020-01-08	2.74327	increase	num_connected_components (0.553); total_area (0.452); num_merges (0.439)
Patvinsuo	2020-05-13	-1.03603	decrease	num_connected_components (0.553); total_area (0.452); num_merges (0.439)
Patvinsuo	2021-01-14	1.88575	increase	num_connected_components (0.553); total_area (0.452); num_merges (0.439)
Patvinsuo	2021-03-15	1.4775	decrease	num_connected_components (0.553); total_area (0.452); num_merges (0.439)
Patvinsuo	2022-11-29	1.95773	increase	num_connected_components (0.553); total_area (0.452); num_merges (0.439)
Patvinsuo	2023-06-09	-0.153762	decrease	num_connected_components (0.553); total_area (0.452); num_merges (0.439)
Patvinsuo	2023-12-30	3.41259	increase	num_connected_components (0.553); total_area (0.452); num_merges (0.439)
Patvinsuo	2024-04-28	0.206492	decrease	num_connected_components (0.553); total_area (0.452); num_merges (0.439)
Poleski	2016-03-10	0.735199	decrease	num_connected_components (0.486); num_merges (0.485); persistent_components (0.459)
Poleski	2018-03-29	0.475063	decrease	num_connected_components (0.486); num_merges (0.485); persistent_components (0.459)
Poleski	2018-05-04	0.159807	increase	num_connected_components (0.486); num_merges (0.485); persistent_components (0.459)
Poleski	2018-07-10	-1.85054	decrease	num_connected_components (0.486); num_merges (0.485); persistent_components (0.459)
Poleski	2018-09-08	-0.373091	increase	num_connected_components (0.486); num_merges (0.485); persistent_components (0.459)
Poleski	2019-08-28	-1.8908	decrease	num_connected_components (0.486); num_merges (0.485); persistent_components (0.459)
Poleski	2019-10-27	1.16531	increase	num_connected_components (0.486); num_merges (0.485); persistent_components (0.459)
Poleski	2020-06-11	-0.623813	decrease	num_connected_components (0.486); num_merges (0.485); persistent_components (0.459)
Poleski	2021-01-25	0.980635	increase	num_connected_components (0.486); num_merges (0.485); persistent_components (0.459)
Poleski	2021-03-20	1.9268	decrease	num_connected_components (0.486); num_merges (0.485); persistent_components (0.459)
Poleski	2021-05-18	0.702668	increase	num_connected_components (0.486); num_merges (0.485); persistent_components (0.459)
Poleski	2021-07-30	0.724915	decrease	num_connected_components (0.486); num_merges (0.485); persistent_components (0.459)
Poleski	2021-09-04	-1.32794	increase	num_connected_components (0.486); num_merges (0.485); persistent_components (0.459)
Poleski	2023-12-04	-2.29608	decrease	num_connected_components (0.486); num_merges (0.485); persistent_components (0.459)
Poleski	2024-04-26	-2.79466	increase	num_connected_components (0.486); num_merges (0.485); persistent_components (0.459)
Prypiat	2015-04-28	-2.00751	increase	num_connected_components (0.565); num_merges (0.538); total_area (0.431)
Prypiat	2017-03-11	-0.305562	decrease	num_connected_components (0.565); num_merges (0.538); total_area (0.431)
Prypiat	2017-06-15	2.09835	increase	num_connected_components (0.565); num_merges (0.538); total_area (0.431)
Prypiat	2017-10-07	-0.263955	decrease	num_connected_components (0.565); num_merges (0.538); total_area (0.431)
Prypiat	2018-06-28	0.746142	decrease	num_connected_components (0.565); num_merges (0.538); total_area (0.431)
Prypiat	2018-09-26	-0.129271	increase	num_connected_components (0.565); num_merges (0.538); total_area (0.431)
Prypiat	2019-01-07	-0.184277	decrease	num_connected_components (0.565); num_merges (0.538); total_area (0.431)
Prypiat	2019-09-21	0.117011	increase	num_connected_components (0.565); num_merges (0.538); total_area (0.431)
Prypiat	2020-02-19	0.349343	decrease	num_connected_components (0.565); num_merges (0.538); total_area (0.431)
Prypiat	2020-10-15	1.0146	increase	num_connected_components (0.565); num_merges (0.538); total_area (0.431)
Prypiat	2021-01-20	0.453057	decrease	num_connected_components (0.565); num_merges (0.538); total_area (0.431)
Prypiat	2021-07-19	-2.13567	decrease	num_connected_components (0.565); num_merges (0.538); total_area (0.431)
Prypiat	2021-09-04	0.0926738	increase	num_connected_components (0.565); num_merges (0.538); total_area (0.431)
Prypiat	2022-11-22	1.2758	decrease	num_connected_components (0.565); num_merges (0.538); total_area (0.431)
Prypiat	2024-06-20	-1.0368	decrease	num_connected_components (0.565); num_merges (0.538); total_area (0.431)
Prypiat	2024-10-18	-1.80659	increase	num_connected_components (0.565); num_merges (0.538); total_area (0.431)
Ronas	2016-10-27	0.788321	increase	total_area (0.533); num_connected_components (0.522); num_new_components (0.465)
Ronas	2017-07-08	-0.218073	decrease	total_area (0.533); num_connected_components (0.522); num_new_components (0.465)
Ronas	2017-09-28	0.158761	increase	total_area (0.533); num_connected_components (0.522); num_new_components (0.465)
Ronas	2018-04-22	-0.712361	decrease	total_area (0.533); num_connected_components (0.522); num_new_components (0.465)
Ronas	2018-09-29	1.5504	increase	total_area (0.533); num_connected_components (0.522); num_new_components (0.465)
Ronas	2018-10-11	0.0962417	decrease	total_area (0.533); num_connected_components (0.522); num_new_components (0.465)
Ronas	2019-05-15	-1.17109	decrease	total_area (0.533); num_connected_components (0.522); num_new_components (0.465)
Ronas	2019-09-02	-0.426646	increase	total_area (0.533); num_connected_components (0.522); num_new_components (0.465)
Ronas	2020-01-06	0.114434	decrease	total_area (0.533); num_connected_components (0.522); num_new_components (0.465)
Ronas	2020-04-11	0.756434	decrease	total_area (0.533); num_connected_components (0.522); num_new_components (0.465)
Ronas	2020-06-10	-1.0298	decrease	total_area (0.533); num_connected_components (0.522); num_new_components (0.465)
Ronas	2020-08-31	-1.18467	increase	total_area (0.533); num_connected_components (0.522); num_new_components (0.465)
Ronas	2020-12-23	1.47593	increase	total_area (0.533); num_connected_components (0.522); num_new_components (0.465)
Ronas	2021-05-10	0.376716	decrease	total_area (0.533); num_connected_components (0.522); num_new_components (0.465)
Ronas	2021-11-14	2.51271	increase	total_area (0.533); num_connected_components (0.522); num_new_components (0.465)
Ronas	2022-02-12	0.913383	decrease	total_area (0.533); num_connected_components (0.522); num_new_components (0.465)
Ronas	2022-11-27	-0.267199	increase	total_area (0.533); num_connected_components (0.522); num_new_components (0.465)
Ronas	2023-04-06	0.149921	decrease	total_area (0.533); num_connected_components (0.522); num_new_components (0.465)
Ronas	2023-08-04	-0.562768	decrease	total_area (0.533); num_connected_components (0.522); num_new_components (0.465)
Ronas	2023-12-16	1.69132	increase	total_area (0.533); num_connected_components (0.522); num_new_components (0.465)
Ronas	2024-03-19	0.0276977	decrease	total_area (0.533); num_connected_components (0.522); num_new_components (0.465)
Ronas	2024-10-09	1.1203	increase	total_area (0.533); num_connected_components (0.522); num_new_components (0.465)
Scarpe	2017-10-27	0.0492997	decrease	num_connected_components (0.471); total_area (0.469); num_merges (0.454)
Scarpe	2019-01-08	2.11455	increase	num_connected_components (0.471); total_area (0.469); num_merges (0.454)
Scarpe	2019-03-21	1.40074	decrease	num_connected_components (0.471); total_area (0.469); num_merges (0.454)
Scarpe	2019-09-29	-3.58931	decrease	num_connected_components (0.471); total_area (0.469); num_merges (0.454)
Scarpe	2020-01-09	-0.954923	increase	num_connected_components (0.471); total_area (0.469); num_merges (0.454)
Scarpe	2020-09-05	-0.441982	increase	num_connected_components (0.471); total_area (0.469); num_merges (0.454)
Scarpe	2021-04-15	1.6791	increase	num_connected_components (0.471); total_area (0.469); num_merges (0.454)
Scarpe	2021-06-14	1.10789	decrease	num_connected_components (0.471); total_area (0.469); num_merges (0.454)
Scarpe	2022-01-28	0.720101	increase	num_connected_components (0.471); total_area (0.469); num_merges (0.454)
Scarpe	2023-07-22	-0.453084	decrease	num_connected_components (0.471); total_area (0.469); num_merges (0.454)
Shatsk	2015-05-03	1.64942	decrease	num_connected_components (0.494); total_area (0.467); num_merges (0.414)
Shatsk	2015-12-22	1.59528	increase	num_connected_components (0.494); total_area (0.467); num_merges (0.414)
Shatsk	2016-01-22	3.21494	decrease	num_connected_components (0.494); total_area (0.467); num_merges (0.414)
Shatsk	2016-02-20	-0.317144	decrease	num_connected_components (0.494); total_area (0.467); num_merges (0.414)
Shatsk	2016-10-11	0.296853	increase	num_connected_components (0.494); total_area (0.467); num_merges (0.414)
Shatsk	2017-07-02	0.0566878	decrease	num_connected_components (0.494); total_area (0.467); num_merges (0.414)
Shatsk	2018-01-16	2.34444	increase	num_connected_components (0.494); total_area (0.467); num_merges (0.414)
Shatsk	2018-01-29	0.977949	decrease	num_connected_components (0.494); total_area (0.467); num_merges (0.414)
Shatsk	2018-04-10	-0.235369	decrease	num_connected_components (0.494); total_area (0.467); num_merges (0.414)
Shatsk	2019-03-18	1.39292	increase	num_connected_components (0.494); total_area (0.467); num_merges (0.414)
Shatsk	2019-04-17	0.893751	decrease	num_connected_components (0.494); total_area (0.467); num_merges (0.414)
Shatsk	2019-11-13	-0.799471	increase	num_connected_components (0.494); total_area (0.467); num_merges (0.414)
Shatsk	2020-03-31	3.828	increase	num_connected_components (0.494); total_area (0.467); num_merges (0.414)
Shatsk	2020-06-10	-0.493189	decrease	num_connected_components (0.494); total_area (0.467); num_merges (0.414)
Shatsk	2020-11-07	-0.911092	decrease	num_connected_components (0.494); total_area (0.467); num_merges (0.414)
Shatsk	2021-06-11	-0.600897	decrease	num_connected_components (0.494); total_area (0.467); num_merges (0.414)
Shatsk	2021-10-15	2.4814	increase	num_connected_components (0.494); total_area (0.467); num_merges (0.414)
Shatsk	2021-10-28	2.81935	decrease	num_connected_components (0.494); total_area (0.467); num_merges (0.414)
Shatsk	2022-05-31	-0.24027	decrease	num_connected_components (0.494); total_area (0.467); num_merges (0.414)
Soomaa	2016-08-01	0.611645	increase	num_connected_components (0.671); persistent_components (0.496); num_new_components (0.366)
Soomaa	2016-11-17	-1.58738	decrease	num_connected_components (0.671); persistent_components (0.496); num_new_components (0.366)
Soomaa	2018-04-22	0.186178	increase	num_connected_components (0.671); persistent_components (0.496); num_new_components (0.366)
Soomaa	2018-11-19	1.19541	decrease	num_connected_components (0.671); persistent_components (0.496); num_new_components (0.366)
Soomaa	2019-06-16	-0.655881	decrease	num_connected_components (0.671); persistent_components (0.496); num_new_components (0.366)
Soomaa	2020-09-20	0.468513	increase	num_connected_components (0.671); persistent_components (0.496); num_new_components (0.366)
Soomaa	2020-12-07	-1.39075	decrease	num_connected_components (0.671); persistent_components (0.496); num_new_components (0.366)
Soomaa	2021-07-30	-0.00795197	increase	num_connected_components (0.671); persistent_components (0.496); num_new_components (0.366)
Soomaa	2021-11-27	-0.392052	decrease	num_connected_components (0.671); persistent_components (0.496); num_new_components (0.366)
Soomaa	2022-03-03	0.28063	increase	num_connected_components (0.671); persistent_components (0.496); num_new_components (0.366)
Soomaa	2024-01-04	-1.62694	decrease	num_connected_components (0.671); persistent_components (0.496); num_new_components (0.366)
Soomaa	2024-04-14	1.03833	increase	num_connected_components (0.671); persistent_components (0.496); num_new_components (0.366)
Soomaa	2024-05-08	0.72864	decrease	num_connected_components (0.671); persistent_components (0.496); num_new_components (0.366)
Soomaa	2024-11-23	0.0506602	decrease	num_connected_components (0.671); persistent_components (0.496); num_new_components (0.366)
Sporovsky	2016-04-15	-0.260967	decrease	num_connected_components (0.486); total_area (0.465); num_merges (0.456)
Sporovsky	2017-06-27	-0.27235	decrease	num_connected_components (0.486); total_area (0.465); num_merges (0.456)
Sporovsky	2018-01-17	1.81021	increase	num_connected_components (0.486); total_area (0.465); num_merges (0.456)
Sporovsky	2018-04-11	-0.364253	decrease	num_connected_components (0.486); total_area (0.465); num_merges (0.456)
Sporovsky	2018-12-26	-0.255305	increase	num_connected_components (0.486); total_area (0.465); num_merges (0.456)
Sporovsky	2019-05-01	-1.08823	decrease	num_connected_components (0.486); total_area (0.465); num_merges (0.456)
Sporovsky	2019-10-21	-1.02871	increase	num_connected_components (0.486); total_area (0.465); num_merges (0.456)
Sporovsky	2020-03-20	3.50279	increase	num_connected_components (0.486); total_area (0.465); num_merges (0.456)
Sporovsky	2020-04-19	4.28208	decrease	num_connected_components (0.486); total_area (0.465); num_merges (0.456)
Sporovsky	2020-05-19	1.39785	decrease	num_connected_components (0.486); total_area (0.465); num_merges (0.456)
Sporovsky	2020-11-15	-0.638901	increase	num_connected_components (0.486); total_area (0.465); num_merges (0.456)
Sporovsky	2021-03-03	2.62941	increase	num_connected_components (0.486); total_area (0.465); num_merges (0.456)
Sporovsky	2021-04-02	1.41988	decrease	num_connected_components (0.486); total_area (0.465); num_merges (0.456)
Sporovsky	2021-06-06	1.97529	increase	num_connected_components (0.486); total_area (0.465); num_merges (0.456)
Sporovsky	2021-06-30	1.81756	decrease	num_connected_components (0.486); total_area (0.465); num_merges (0.456)
Sporovsky	2021-10-10	3.85721	increase	num_connected_components (0.486); total_area (0.465); num_merges (0.456)
Sporovsky	2022-04-15	-0.601032	decrease	num_connected_components (0.486); total_area (0.465); num_merges (0.456)
Sporovsky	2023-01-28	1.12865	increase	num_connected_components (0.486); total_area (0.465); num_merges (0.456)
Sporovsky	2023-06-02	0.326114	decrease	num_connected_components (0.486); total_area (0.465); num_merges (0.456)
Svislochsko	2016-01-24	-2.1253	increase	total_area (0.520); num_connected_components (0.512); num_new_components (0.507)
Svislochsko	2018-04-19	1.32272	decrease	total_area (0.520); num_connected_components (0.512); num_new_components (0.507)
Svislochsko	2019-09-05	0.435787	decrease	total_area (0.520); num_connected_components (0.512); num_new_components (0.507)
Svislochsko	2019-11-16	0.515628	decrease	total_area (0.520); num_connected_components (0.512); num_new_components (0.507)
Svislochsko	2021-03-04	1.77097	increase	total_area (0.520); num_connected_components (0.512); num_new_components (0.507)
Svislochsko	2021-04-09	-0.294197	decrease	total_area (0.520); num_connected_components (0.512); num_new_components (0.507)
Svislochsko	2021-09-06	0.464517	increase	total_area (0.520); num_connected_components (0.512); num_new_components (0.507)
Svislochsko	2021-12-17	0.995527	decrease	total_area (0.520); num_connected_components (0.512); num_new_components (0.507)
Syra	2015-07-09	-1.23382	decrease	num_connected_components (0.608); total_area (-0.473); num_fragmentations (0.472)
Syra	2016-04-05	-0.481825	increase	num_connected_components (0.608); total_area (-0.473); num_fragmentations (0.472)
Syra	2017-05-23	3.61502	increase	num_connected_components (0.608); total_area (-0.473); num_fragmentations (0.472)
Syra	2017-07-04	2.95239	decrease	num_connected_components (0.608); total_area (-0.473); num_fragmentations (0.472)
Syra	2017-07-22	0.498954	decrease	num_connected_components (0.608); total_area (-0.473); num_fragmentations (0.472)
Syra	2018-02-05	1.81363	increase	num_connected_components (0.608); total_area (-0.473); num_fragmentations (0.472)
Syra	2018-06-23	-0.162733	decrease	num_connected_components (0.608); total_area (-0.473); num_fragmentations (0.472)
Syra	2019-02-18	-0.0354664	increase	num_connected_components (0.608); total_area (-0.473); num_fragmentations (0.472)
Syra	2019-09-10	-0.506062	decrease	num_connected_components (0.608); total_area (-0.473); num_fragmentations (0.472)
Syra	2020-01-27	0.585335	increase	num_connected_components (0.608); total_area (-0.473); num_fragmentations (0.472)
Syra	2021-03-16	0.0470185	increase	num_connected_components (0.608); total_area (-0.473); num_fragmentations (0.472)
Syra	2021-06-08	0.952791	decrease	num_connected_components (0.608); total_area (-0.473); num_fragmentations (0.472)
Syra	2022-01-16	-1.26462	increase	num_connected_components (0.608); total_area (-0.473); num_fragmentations (0.472)
Tavvavuoma	2015-06-02	-0.113933	decrease	num_merges (0.471); num_connected_components (0.465); total_area (0.455)
Tavvavuoma	2015-11-17	1.40582	increase	num_merges (0.471); num_connected_components (0.465); total_area (0.455)
Tavvavuoma	2016-05-03	1.05616	decrease	num_merges (0.471); num_connected_components (0.465); total_area (0.455)
Tavvavuoma	2016-10-12	-0.807975	increase	num_merges (0.471); num_connected_components (0.465); total_area (0.455)
Tavvavuoma	2017-06-10	-1.76757	decrease	num_merges (0.471); num_connected_components (0.465); total_area (0.455)
Tavvavuoma	2017-12-24	1.33009	increase	num_merges (0.471); num_connected_components (0.465); total_area (0.455)
Tavvavuoma	2018-04-30	1.35502	decrease	num_merges (0.471); num_connected_components (0.465); total_area (0.455)
Tavvavuoma	2018-06-30	-0.456418	decrease	num_merges (0.471); num_connected_components (0.465); total_area (0.455)
Tavvavuoma	2018-10-28	0.163758	increase	num_merges (0.471); num_connected_components (0.465); total_area (0.455)
Tavvavuoma	2019-05-01	-1.61482	decrease	num_merges (0.471); num_connected_components (0.465); total_area (0.455)
Tavvavuoma	2019-10-23	0.182296	increase	num_merges (0.471); num_connected_components (0.465); total_area (0.455)
Tavvavuoma	2020-06-11	-0.419632	decrease	num_merges (0.471); num_connected_components (0.465); total_area (0.455)
Tavvavuoma	2020-10-21	0.00919493	increase	num_merges (0.471); num_connected_components (0.465); total_area (0.455)
Tavvavuoma	2021-05-21	0.032942	decrease	num_merges (0.471); num_connected_components (0.465); total_area (0.455)
Tavvavuoma	2021-10-17	-0.622974	increase	num_merges (0.471); num_connected_components (0.465); total_area (0.455)
Tavvavuoma	2022-05-15	0.670915	decrease	num_merges (0.471); num_connected_components (0.465); total_area (0.455)
Tavvavuoma	2022-10-23	0.596337	increase	num_merges (0.471); num_connected_components (0.465); total_area (0.455)
Tavvavuoma	2023-05-10	0.0730223	decrease	num_merges (0.471); num_connected_components (0.465); total_area (0.455)
Tavvavuoma	2023-07-14	-1.6983	decrease	num_merges (0.471); num_connected_components (0.465); total_area (0.455)
Tavvavuoma	2023-10-01	-3.04658	increase	num_merges (0.471); num_connected_components (0.465); total_area (0.455)
Tavvavuoma	2024-05-11	0.346016	decrease	num_merges (0.471); num_connected_components (0.465); total_area (0.455)
Tavvavuoma	2024-10-26	-0.598725	increase	num_merges (0.471); num_connected_components (0.465); total_area (0.455)
Teici	2015-03-28	2.23271	decrease	num_connected_components (0.469); total_area (0.447); num_merges (0.439)
Teici	2015-10-06	1.49978	increase	num_connected_components (0.469); total_area (0.447); num_merges (0.439)
Teici	2016-02-15	-1.2794	decrease	num_connected_components (0.469); total_area (0.447); num_merges (0.439)
Teici	2016-10-06	-0.812676	increase	num_connected_components (0.469); total_area (0.447); num_merges (0.439)
Teici	2016-11-12	-0.651674	decrease	num_connected_components (0.469); total_area (0.447); num_merges (0.439)
Teici	2017-12-25	0.162237	increase	num_connected_components (0.469); total_area (0.447); num_merges (0.439)
Teici	2018-04-12	-0.830473	decrease	num_connected_components (0.469); total_area (0.447); num_merges (0.439)
Teici	2018-11-14	-0.700266	increase	num_connected_components (0.469); total_area (0.447); num_merges (0.439)
Teici	2019-03-20	-0.914863	decrease	num_connected_components (0.469); total_area (0.447); num_merges (0.439)
Teici	2020-02-25	0.743677	increase	num_connected_components (0.469); total_area (0.447); num_merges (0.439)
Teici	2020-06-18	0.851899	decrease	num_connected_components (0.469); total_area (0.447); num_merges (0.439)
Teici	2020-10-22	0.0580016	increase	num_connected_components (0.469); total_area (0.447); num_merges (0.439)
Teici	2021-04-08	-0.0570727	decrease	num_connected_components (0.469); total_area (0.447); num_merges (0.439)
Teici	2021-12-28	3.22633	increase	num_connected_components (0.469); total_area (0.447); num_merges (0.439)
Teici	2022-02-07	2.0923	decrease	num_connected_components (0.469); total_area (0.447); num_merges (0.439)
Teici	2022-05-02	-0.734867	decrease	num_connected_components (0.469); total_area (0.447); num_merges (0.439)
Teici	2022-12-28	1.8429	increase	num_connected_components (0.469); total_area (0.447); num_merges (0.439)
Teici	2023-04-22	-0.0761386	decrease	num_connected_components (0.469); total_area (0.447); num_merges (0.439)
Teici	2023-11-24	1.20974	increase	num_connected_components (0.469); total_area (0.447); num_merges (0.439)
Teici	2024-02-28	1.07126	decrease	num_connected_components (0.469); total_area (0.447); num_merges (0.439)
Teici	2024-12-12	5.3451	increase	num_connected_components (0.469); total_area (0.447); num_merges (0.439)
Tjalmejaure	2015-12-16	1.36574	increase	num_connected_components (0.507); num_merges (0.482); num_fragmentations (0.417)
Tjalmejaure	2016-06-08	-1.70251	decrease	num_connected_components (0.507); num_merges (0.482); num_fragmentations (0.417)
Tjalmejaure	2016-10-24	0.385046	increase	num_connected_components (0.507); num_merges (0.482); num_fragmentations (0.417)
Tjalmejaure	2017-06-02	-0.258885	decrease	num_connected_components (0.507); num_merges (0.482); num_fragmentations (0.417)
Tjalmejaure	2017-12-11	1.01224	increase	num_connected_components (0.507); num_merges (0.482); num_fragmentations (0.417)
Tjalmejaure	2018-05-10	-0.145839	decrease	num_connected_components (0.507); num_merges (0.482); num_fragmentations (0.417)
Tjalmejaure	2018-11-19	0.129368	increase	num_connected_components (0.507); num_merges (0.482); num_fragmentations (0.417)
Tjalmejaure	2019-06-04	-1.2361	decrease	num_connected_components (0.507); num_merges (0.482); num_fragmentations (0.417)
Tjalmejaure	2020-01-06	0.639875	increase	num_connected_components (0.507); num_merges (0.482); num_fragmentations (0.417)
Tjalmejaure	2020-05-29	0.494251	decrease	num_connected_components (0.507); num_merges (0.482); num_fragmentations (0.417)
Tjalmejaure	2020-11-07	0.316807	increase	num_connected_components (0.507); num_merges (0.482); num_fragmentations (0.417)
Tjalmejaure	2021-05-31	-0.543039	decrease	num_connected_components (0.507); num_merges (0.482); num_fragmentations (0.417)
Tjalmejaure	2021-11-02	1.1512	increase	num_connected_components (0.507); num_merges (0.482); num_fragmentations (0.417)
Tjalmejaure	2022-05-01	2.20609	decrease	num_connected_components (0.507); num_merges (0.482); num_fragmentations (0.417)
Tjalmejaure	2022-11-09	1.10166	increase	num_connected_components (0.507); num_merges (0.482); num_fragmentations (0.417)
Tjalmejaure	2023-05-08	1.20437	decrease	num_connected_components (0.507); num_merges (0.482); num_fragmentations (0.417)
Tjalmejaure	2023-11-04	-0.310417	increase	num_connected_components (0.507); num_merges (0.482); num_fragmentations (0.417)
Tjalmejaure	2024-06-14	-1.95683	decrease	num_connected_components (0.507); num_merges (0.482); num_fragmentations (0.417)
Unterer	2018-04-08	-0.844408	increase	num_connected_components (0.529); num_merges (0.508); total_area (0.466)
Unterer	2019-01-09	-0.321295	increase	num_connected_components (0.529); num_merges (0.508); total_area (0.466)
Unterer	2019-04-09	-0.500333	increase	num_connected_components (0.529); num_merges (0.508); total_area (0.466)
Unterer	2019-08-07	0.367526	decrease	num_connected_components (0.529); num_merges (0.508); total_area (0.466)
Unterer	2020-01-04	-1.50256	increase	num_connected_components (0.529); num_merges (0.508); total_area (0.466)
Unterer	2023-07-17	0.969222	decrease	num_connected_components (0.529); num_merges (0.508); total_area (0.466)
Unterer	2024-03-13	-2.05752	decrease	num_connected_components (0.529); num_merges (0.508); total_area (0.466)
Vildmosse	2015-07-30	-0.191336	decrease	num_connected_components (0.499); num_merges (0.468); total_area (0.462)
Vildmosse	2016-07-24	-1.95308	decrease	num_connected_components (0.499); num_merges (0.468); total_area (0.462)
Vildmosse	2016-09-22	0.718109	increase	num_connected_components (0.499); num_merges (0.468); total_area (0.462)
Vildmosse	2016-11-04	0.816694	decrease	num_connected_components (0.499); num_merges (0.468); total_area (0.462)
Vildmosse	2017-07-19	-1.86986	decrease	num_connected_components (0.499); num_merges (0.468); total_area (0.462)
Vildmosse	2017-09-17	-0.190722	increase	num_connected_components (0.499); num_merges (0.468); total_area (0.462)
Vildmosse	2018-02-14	0.607023	increase	num_connected_components (0.499); num_merges (0.468); total_area (0.462)
Vildmosse	2018-03-22	-0.302965	decrease	num_connected_components (0.499); num_merges (0.468); total_area (0.462)
Vildmosse	2018-10-24	-0.0333206	increase	num_connected_components (0.499); num_merges (0.468); total_area (0.462)
Vildmosse	2018-10-31	0.0803343	decrease	num_connected_components (0.499); num_merges (0.468); total_area (0.462)
Vildmosse	2018-12-24	-1.65981	increase	num_connected_components (0.499); num_merges (0.468); total_area (0.462)
Vildmosse	2020-02-10	0.956563	increase	num_connected_components (0.499); num_merges (0.468); total_area (0.462)
Vildmosse	2020-10-01	2.6217	increase	num_connected_components (0.499); num_merges (0.468); total_area (0.462)
Vildmosse	2020-10-25	1.80163	decrease	num_connected_components (0.499); num_merges (0.468); total_area (0.462)
Vildmosse	2021-04-30	0.286941	decrease	num_connected_components (0.499); num_merges (0.468); total_area (0.462)
Vildmosse	2021-11-13	2.23753	increase	num_connected_components (0.499); num_merges (0.468); total_area (0.462)
Vildmosse	2022-06-23	0.849537	decrease	num_connected_components (0.499); num_merges (0.468); total_area (0.462)
Vildmosse	2023-02-13	1.22814	increase	num_connected_components (0.499); num_merges (0.468); total_area (0.462)
Vildmosse	2023-07-24	-1.346	decrease	num_connected_components (0.499); num_merges (0.468); total_area (0.462)
Vransko	2015-03-24	2.33294	increase	num_connected_components (0.671); num_new_components (0.516); num_merges (0.363)
Vransko	2015-08-27	1.86135	decrease	num_connected_components (0.671); num_new_components (0.516); num_merges (0.363)
Vransko	2015-11-14	1.49069	decrease	num_connected_components (0.671); num_new_components (0.516); num_merges (0.363)
Vransko	2016-07-16	-1.13908	decrease	num_connected_components (0.671); num_new_components (0.516); num_merges (0.363)
Vransko	2016-12-26	-0.911726	increase	num_connected_components (0.671); num_new_components (0.516); num_merges (0.363)
Vransko	2018-05-14	3.28122	increase	num_connected_components (0.671); num_new_components (0.516); num_merges (0.363)
Vransko	2018-05-31	2.4257	decrease	num_connected_components (0.671); num_new_components (0.516); num_merges (0.363)
Vransko	2018-06-30	-0.613859	decrease	num_connected_components (0.671); num_new_components (0.516); num_merges (0.363)
Vransko	2019-02-20	-0.326033	increase	num_connected_components (0.671); num_new_components (0.516); num_merges (0.363)
Vransko	2019-09-23	-0.676285	decrease	num_connected_components (0.671); num_new_components (0.516); num_merges (0.363)
Vransko	2019-12-10	-0.191223	increase	num_connected_components (0.671); num_new_components (0.516); num_merges (0.363)
Vransko	2020-08-30	-0.0932827	decrease	num_connected_components (0.671); num_new_components (0.516); num_merges (0.363)
Vransko	2021-05-10	1.35759	increase	num_connected_components (0.671); num_new_components (0.516); num_merges (0.363)
Vransko	2021-09-13	-0.432416	decrease	num_connected_components (0.671); num_new_components (0.516); num_merges (0.363)
Vransko	2022-02-03	-0.285024	increase	num_connected_components (0.671); num_new_components (0.516); num_merges (0.363)
Vransko	2022-08-09	0.0800108	decrease	num_connected_components (0.671); num_new_components (0.516); num_merges (0.363)
Vransko	2023-03-30	0.206	increase	num_connected_components (0.671); num_new_components (0.516); num_merges (0.363)
Vransko	2023-07-04	-0.639006	decrease	num_connected_components (0.671); num_new_components (0.516); num_merges (0.363)
Wieden	2016-05-30	0.326364	decrease	num_connected_components (0.534); total_area (0.518); num_new_components (0.510)
Wieden	2017-05-31	-0.0906126	increase	num_connected_components (0.534); total_area (0.518); num_new_components (0.510)
Wieden	2017-06-30	-0.340773	decrease	num_connected_components (0.534); total_area (0.518); num_new_components (0.510)
Wieden	2017-12-09	-0.265065	increase	num_connected_components (0.534); total_area (0.518); num_new_components (0.510)
Wieden	2018-02-13	0.400398	increase	num_connected_components (0.534); total_area (0.518); num_new_components (0.510)
Wieden	2018-03-15	0.971694	decrease	num_connected_components (0.534); total_area (0.518); num_new_components (0.510)
Wieden	2018-05-14	-0.293813	decrease	num_connected_components (0.534); total_area (0.518); num_new_components (0.510)
Wieden	2020-01-28	0.209421	increase	num_connected_components (0.534); total_area (0.518); num_new_components (0.510)
Wieden	2020-05-27	0.0519787	decrease	num_connected_components (0.534); total_area (0.518); num_new_components (0.510)
Wieden	2021-04-10	0.146471	increase	num_connected_components (0.534); total_area (0.518); num_new_components (0.510)
Wieden	2021-06-15	-0.578549	decrease	num_connected_components (0.534); total_area (0.518); num_new_components (0.510)
Wieden	2022-02-16	0.272277	increase	num_connected_components (0.534); total_area (0.518); num_new_components (0.510)
Wieden	2023-07-05	-0.620672	decrease	num_connected_components (0.534); total_area (0.518); num_new_components (0.510)
Wigry	2015-08-12	4.38247	decrease	num_connected_components (0.541); total_area (0.508); num_new_components (0.453)
Wigry	2016-03-03	-1.08201	decrease	num_connected_components (0.541); total_area (0.508); num_new_components (0.453)
Wigry	2020-01-18	0.478877	increase	num_connected_components (0.541); total_area (0.508); num_new_components (0.453)
Wigry	2020-03-24	1.34225	increase	num_connected_components (0.541); total_area (0.508); num_new_components (0.453)
Wigry	2020-05-23	2.01037	increase	num_connected_components (0.541); total_area (0.508); num_new_components (0.453)
Wigry	2020-11-19	0.289827	increase	num_connected_components (0.541); total_area (0.508); num_new_components (0.453)
Wigry	2021-05-06	-0.10327	decrease	num_connected_components (0.541); total_area (0.508); num_new_components (0.453)
Wigry	2023-08-18	-1.3442	decrease	num_connected_components (0.541); total_area (0.508); num_new_components (0.453)

## Sheet: connectivity_with_aggregated_cl
date	total_area	num_connected_components	num_merges	num_fragmentations	num_merge_events	num_frag_events	num_new_components	persistent_components	graph_num_components	graph_largest_component_area	graph_mean_component_area	graph_edges	graph_betweenness	graph_closeness	graph_modularity	precip_mm	temp_c	name	pct_tree	pct_shr	pct_gras	pct_crop	pct_buil	pct_bare	pct_ice	pct_wate	pct_wetl	pct_moss	shape_leng	shape_area	area	ws_area	ws_ratio	pp	barriers	geometry	full_name	country	koppen-geiger climate classification	area (ha)	ecosystem services	threats (general)	threats (grouped)	threats	precip_7d	temp_7d
2015-01-11	2892.56	15	0	0	0	0	0	0	15	2849.23	192.837	0	0	0	0	0	7.39929	vransko	29.4751	10.1882	3.58895	0.628821	0.181905	0.0244839	0	50.9659	4.9466	0	0.393025	0.00645738	5764.72	27936	4.84603	3	0	POLYGON ((15.540344970743831 43.952883856404924, 15.540434680815906 43.95275570031538, 15.541101091941869 43.952396863624415, 15.542267312086835 43.952255892195694, 15.542908092534503 43.952089289189416, 15.543728291327625 43.95203802693345, 15.5442665463641 43.95182016167115, 15.544651014632677 43.95148695565854, 15.545663448009748 43.949295486797325, 15.546483646802926 43.947655089211025, 15.54…	Vransko Lake	Croatia	7	5748	biodiversity, flood control, water quality regulation, recreation, eco-tourism, research, livestock	burning, resource extraction, pollution	2007-09-08	Some red burning, illegal fhishing and peachers, illegal garbage disposal	121.6	7.29898
2015-01-18	3019.75	17	4	10	1	2	1	5	15	2916.31	201.317	2	0.00833333	2.40027	0	177.4	9.44	vransko	29.4751	10.1882	3.58895	0.628821	0.181905	0.0244839	0	50.9659	4.9466	0	0.393025	0.00645738	5764.72	27936	4.84603	3	0	POLYGON ((15.540344970743831 43.952883856404924, 15.540434680815906 43.95275570031538, 15.541101091941869 43.952396863624415, 15.542267312086835 43.952255892195694, 15.542908092534503 43.952089289189416, 15.543728291327625 43.95203802693345, 15.5442665463641 43.95182016167115, 15.544651014632677 43.95148695565854, 15.545663448009748 43.949295486797325, 15.546483646802926 43.947655089211025, 15.54…	Vransko Lake	Croatia	7	5748	biodiversity, flood control, water quality regulation, recreation, eco-tourism, research, livestock	burning, resource extraction, pollution	2007-09-08	Some red burning, illegal fhishing and peachers, illegal garbage disposal	375.5	9.40388
2015-01-30	2972.74	15	9	7	4	4	0	4	15	2915.4	198.183	0	0	0	0	126.1	8.12	vransko	29.4751	10.1882	3.58895	0.628821	0.181905	0.0244839	0	50.9659	4.9466	0	0.393025	0.00645738	5764.72	27936	4.84603	3	0	POLYGON ((15.540344970743831 43.952883856404924, 15.540434680815906 43.95275570031538, 15.541101091941869 43.952396863624415, 15.542267312086835 43.952255892195694, 15.542908092534503 43.952089289189416, 15.543728291327625 43.95203802693345, 15.5442665463641 43.95182016167115, 15.544651014632677 43.95148695565854, 15.545663448009748 43.949295486797325, 15.546483646802926 43.947655089211025, 15.54…	Vransko Lake	Croatia	7	5748	biodiversity, flood control, water quality regulation, recreation, eco-tourism, research, livestock	burning, resource extraction, pollution	2007-09-08	Some red burning, illegal fhishing and peachers, illegal garbage disposal	283.3	6.17633
2015-02-04	2962.27	21	11	1	1	1	16	3	19	2902.91	155.909	2	0	1.64677	0.5	70.9	6.95786	vransko	29.4751	10.1882	3.58895	0.628821	0.181905	0.0244839	0	50.9659	4.9466	0	0.393025	0.00645738	5764.72	27936	4.84603	3	0	POLYGON ((15.540344970743831 43.952883856404924, 15.540434680815906 43.95275570031538, 15.541101091941869 43.952396863624415, 15.542267312086835 43.952255892195694, 15.542908092534503 43.952089289189416, 15.543728291327625 43.95203802693345, 15.5442665463641 43.95182016167115, 15.544651014632677 43.95148695565854, 15.545663448009748 43.949295486797325, 15.546483646802926 43.947655089211025, 15.54…	Vransko Lake	Croatia	7	5748	biodiversity, flood control, water quality regulation, recreation, eco-tourism, research, livestock	burning, resource extraction, pollution	2007-09-08	Some red burning, illegal fhishing and peachers, illegal garbage disposal	231.1	5.87102
2015-02-16	3152.95	26	8	3	4	3	9	10	26	3072.92	121.267	0	0	0	0	92.7	9.695	vransko	29.4751	10.1882	3.58895	0.628821	0.181905	0.0244839	0	50.9659	4.9466	0	0.393025	0.00645738	5764.72	27936	4.84603	3	0	POLYGON ((15.540344970743831 43.952883856404924, 15.540434680815906 43.95275570031538, 15.541101091941869 43.952396863624415, 15.542267312086835 43.952255892195694, 15.542908092534503 43.952089289189416, 15.543728291327625 43.95203802693345, 15.5442665463641 43.95182016167115, 15.544651014632677 43.95148695565854, 15.545663448009748 43.949295486797325, 15.546483646802926 43.947655089211025, 15.54…	Vransko Lake	Croatia	7	5748	biodiversity, flood control, water quality regulation, recreation, eco-tourism, research, livestock	burning, resource extraction, pollution	2007-09-08	Some red burning, illegal fhishing and peachers, illegal garbage disposal	123.3	7.42571
2015-02-23	3002.92	9	3	4	1	1	0	4	8	2960.49	375.365	1	0	2.05765	0	22.2	10.0936	vransko	29.4751	10.1882	3.58895	0.628821	0.181905	0.0244839	0	50.9659	4.9466	0	0.393025	0.00645738	5764.72	27936	4.84603	3	0	POLYGON ((15.540344970743831 43.952883856404924, 15.540434680815906 43.95275570031538, 15.541101091941869 43.952396863624415, 15.542267312086835 43.952255892195694, 15.542908092534503 43.952089289189416, 15.543728291327625 43.95203802693345, 15.5442665463641 43.95182016167115, 15.544651014632677 43.95148695565854, 15.545663448009748 43.949295486797325, 15.546483646802926 43.947655089211025, 15.54…	Vransko Lake	Croatia	7	5748	biodiversity, flood control, water quality regulation, recreation, eco-tourism, research, livestock	burning, resource extraction, pollution	2007-09-08	Some red burning, illegal fhishing and peachers, illegal garbage disposal	32	7.56898
2015-02-28	3194.59	19	5	0	1	0	14	4	18	3142.68	177.477	1	0	1.21794	0	0	8.37143	vransko	29.4751	10.1882	3.58895	0.628821	0.181905	0.0244839	0	50.9659	4.9466	0	0.393025	0.00645738	5764.72	27936	4.84603	3	0	POLYGON ((15.540344970743831 43.952883856404924, 15.540434680815906 43.95275570031538, 15.541101091941869 43.952396863624415, 15.542267312086835 43.952255892195694, 15.542908092534503 43.952089289189416, 15.543728291327625 43.95203802693345, 15.5442665463641 43.95182016167115, 15.544651014632677 43.95148695565854, 15.545663448009748 43.949295486797325, 15.546483646802926 43.947655089211025, 15.54…	Vransko Lake	Croatia	7	5748	biodiversity, flood control, water quality regulation, recreation, eco-tourism, research, livestock	burning, resource extraction, pollution	2007-09-08	Some red burning, illegal fhishing and peachers, illegal garbage disposal	130.8	9.20857
2015-03-07	3032.62	6	0	0	0	0	0	6	6	3017.72	505.437	0	0	0	0	11.1	7.67071	vransko	29.4751	10.1882	3.58895	0.628821	0.181905	0.0244839	0	50.9659	4.9466	0	0.393025	0.00645738	5764.72	27936	4.84603	3	0	POLYGON ((15.540344970743831 43.952883856404924, 15.540434680815906 43.95275570031538, 15.541101091941869 43.952396863624415, 15.542267312086835 43.952255892195694, 15.542908092534503 43.952089289189416, 15.543728291327625 43.95203802693345, 15.5442665463641 43.95182016167115, 15.544651014632677 43.95148695565854, 15.545663448009748 43.949295486797325, 15.546483646802926 43.947655089211025, 15.54…	Vransko Lake	Croatia	7	5748	biodiversity, flood control, water quality regulation, recreation, eco-tourism, research, livestock	burning, resource extraction, pollution	2007-09-08	Some red burning, illegal fhishing and peachers, illegal garbage disposal	595.9	8.51204
2015-03-12	3082.75	20	0	2	0	1	13	5	20	3013.04	154.138	0	0	0	0	58.9	8.2	vransko	29.4751	10.1882	3.58895	0.628821	0.181905	0.0244839	0	50.9659	4.9466	0	0.393025	0.00645738	5764.72	27936	4.84603	3	0	POLYGON ((15.540344970743831 43.952883856404924, 15.540434680815906 43.95275570031538, 15.541101091941869 43.952396863624415, 15.542267312086835 43.952255892195694, 15.542908092534503 43.952089289189416, 15.543728291327625 43.95203802693345, 15.5442665463641 43.95182016167115, 15.544651014632677 43.95148695565854, 15.545663448009748 43.949295486797325, 15.546483646802926 43.947655089211025, 15.54…	Vransko Lake	Croatia	7	5748	biodiversity, flood control, water quality regulation, recreation, eco-tourism, research, livestock	burning, resource extraction, pollution	2007-09-08	Some red burning, illegal fhishing and peachers, illegal garbage disposal	233.2	8.20796
2015-03-19	2978.94	12	2	6	1	1	0	5	12	2937.72	248.245	0	0	0	0	0	10.125	vransko	29.4751	10.1882	3.58895	0.628821	0.181905	0.0244839	0	50.9659	4.9466	0	0.393025	0.00645738	5764.72	27936	4.84603	3	0	POLYGON ((15.540344970743831 43.952883856404924, 15.540434680815906 43.95275570031538, 15.541101091941869 43.952396863624415, 15.542267312086835 43.952255892195694, 15.542908092534503 43.952089289189416, 15.543728291327625 43.95203802693345, 15.5442665463641 43.95182016167115, 15.544651014632677 43.95148695565854, 15.545663448009748 43.949295486797325, 15.546483646802926 43.947655089211025, 15.54…	Vransko Lake	Croatia	7	5748	biodiversity, flood control, water quality regulation, recreation, eco-tourism, research, livestock	burning, resource extraction, pollution	2007-09-08	Some red burning, illegal fhishing and peachers, illegal garbage disposal	0	9.99286
2015-03-24	3100.2	38	6	4	3	4	25	6	35	2983.08	88.5772	3	0.0015015	1.9751	0.444448	0	12.6707	vransko	29.4751	10.1882	3.58895	0.628821	0.181905	0.0244839	0	50.9659	4.9466	0	0.393025	0.00645738	5764.72	27936	4.84603	3	0	POLYGON ((15.540344970743831 43.952883856404924, 15.540434680815906 43.95275570031538, 15.541101091941869 43.952396863624415, 15.542267312086835 43.952255892195694, 15.542908092534503 43.952089289189416, 15.543728291327625 43.95203802693345, 15.5442665463641 43.95182016167115, 15.544651014632677 43.95148695565854, 15.545663448009748 43.949295486797325, 15.546483646802926 43.947655089211025, 15.54…	Vransko Lake	Croatia	7	5748	biodiversity, flood control, water quality regulation, recreation, eco-tourism, research, livestock	burning, resource extraction, pollution	2007-09-08	Some red burning, illegal fhishing and peachers, illegal garbage disposal	0	10.5286
2015-03-31	3064.75	20	17	10	5	4	0	5	17	3014.55	180.279	3	0.0175439	4.37278	0	0	13.6964	vransko	29.4751	10.1882	3.58895	0.628821	0.181905	0.0244839	0	50.9659	4.9466	0	0.393025	0.00645738	5764.72	27936	4.84603	3	0	POLYGON ((15.540344970743831 43.952883856404924, 15.540434680815906 43.95275570031538, 15.541101091941869 43.952396863624415, 15.542267312086835 43.952255892195694, 15.542908092534503 43.952089289189416, 15.543728291327625 43.95203802693345, 15.5442665463641 43.95182016167115, 15.544651014632677 43.95148695565854, 15.545663448009748 43.949295486797325, 15.546483646802926 43.947655089211025, 15.54…	Vransko Lake	Croatia	7	5748	biodiversity, flood control, water quality regulation, recreation, eco-tourism, research, livestock	burning, resource extraction, pollution	2007-09-08	Some red burning, illegal fhishing and peachers, illegal garbage disposal	311.9	12.9863
2015-04-05	2961.55	22	10	3	3	2	9	7	22	2832.04	134.616	0	0	0	0	85.6	8.525	vransko	29.4751	10.1882	3.58895	0.628821	0.181905	0.0244839	0	50.9659	4.9466	0	0.393025	0.00645738	5764.72	27936	4.84603	3	0	POLYGON ((15.540344970743831 43.952883856404924, 15.540434680815906 43.95275570031538, 15.541101091941869 43.952396863624415, 15.542267312086835 43.952255892195694, 15.542908092534503 43.952089289189416, 15.543728291327625 43.95203802693345, 15.5442665463641 43.95182016167115, 15.544651014632677 43.95148695565854, 15.545663448009748 43.949295486797325, 15.546483646802926 43.947655089211025, 15.54…	Vransko Lake	Croatia	7	5748	biodiversity, flood control, water quality regulation, recreation, eco-tourism, research, livestock	burning, resource extraction, pollution	2007-09-08	Some red burning, illegal fhishing and peachers, illegal garbage disposal	106.9	11.0326
2015-04-12	3128.97	24	6	20	2	4	0	2	17	3061.25	184.057	7	0.083004	12.4076	0	0	14.2964	vransko	29.4751	10.1882	3.58895	0.628821	0.181905	0.0244839	0	50.9659	4.9466	0	0.393025	0.00645738	5764.72	27936	4.84603	3	0	POLYGON ((15.540344970743831 43.952883856404924, 15.540434680815906 43.95275570031538, 15.541101091941869 43.952396863624415, 15.542267312086835 43.952255892195694, 15.542908092534503 43.952089289189416, 15.543728291327625 43.95203802693345, 15.5442665463641 43.95182016167115, 15.544651014632677 43.95148695565854, 15.545663448009748 43.949295486797325, 15.546483646802926 43.947655089211025, 15.54…	Vransko Lake	Croatia	7	5748	biodiversity, flood control, water quality regulation, recreation, eco-tourism, research, livestock	burning, resource extraction, pollution	2007-09-08	Some red burning, illegal fhishing and peachers, illegal garbage disposal	0	10.9784
2015-04-17	3233.41	38	21	1	12	10	22	3	29	3120.36	111.497	9	0.042042	10.2825	0.161074	0	15.0886	vransko	29.4751	10.1882	3.58895	0.628821	0.181905	0.0244839	0	50.9659	4.9466	0	0.393025	0.00645738	5764.72	27936	4.84603	3	0	POLYGON ((15.540344970743831 43.952883856404924, 15.540434680815906 43.95275570031538, 15.541101091941869 43.952396863624415, 15.542267312086835 43.952255892195694, 15.542908092534503 43.952089289189416, 15.543728291327625 43.95203802693345, 15.5442665463641 43.95182016167115, 15.544651014632677 43.95148695565854, 15.545663448009748 43.949295486797325, 15.546483646802926 43.947655089211025, 15.54…	Vransko Lake	Croatia	7	5748	biodiversity, flood control, water quality regulation, recreation, eco-tourism, research, livestock	burning, resource extraction, pollution	2007-09-08	Some red burning, illegal fhishing and peachers, illegal garbage disposal	0	14.867
2015-04-24	3189.14	21	15	8	7	7	1	5	18	3136.74	177.174	3	0.0157895	3.459	0	0	15.54	vransko	29.4751	10.1882	3.58895	0.628821	0.181905	0.0244839	0	50.9659	4.9466	0	0.393025	0.00645738	5764.72	27936	4.84603	3	0	POLYGON ((15.540344970743831 43.952883856404924, 15.540434680815906 43.95275570031538, 15.541101091941869 43.952396863624415, 15.542267312086835 43.952255892195694, 15.542908092534503 43.952089289189416, 15.543728291327625 43.95203802693345, 15.5442665463641 43.95182016167115, 15.544651014632677 43.95148695565854, 15.545663448009748 43.949295486797325, 15.546483646802926 43.947655089211025, 15.54…	Vransko Lake	Croatia	7	5748	biodiversity, flood control, water quality regulation, recreation, eco-tourism, research, livestock	burning, resource extraction, pollution	2007-09-08	Some red burning, illegal fhishing and peachers, illegal garbage disposal	248.9	13.9998
2015-04-29	3012.88	23	9	5	4	6	7	7	23	2947.63	130.995	0	0	0	0	122.4	14.4686	vransko	29.4751	10.1882	3.58895	0.628821	0.181905	0.0244839	0	50.9659	4.9466	0	0.393025	0.00645738	5764.72	27936	4.84603	3	0	POLYGON ((15.540344970743831 43.952883856404924, 15.540434680815906 43.95275570031538, 15.541101091941869 43.952396863624415, 15.542267312086835 43.952255892195694, 15.542908092534503 43.952089289189416, 15.543728291327625 43.95203802693345, 15.5442665463641 43.95182016167115, 15.544651014632677 43.95148695565854, 15.545663448009748 43.949295486797325, 15.546483646802926 43.947655089211025, 15.54…	Vransko Lake	Croatia	7	5748	biodiversity, flood control, water quality regulation, recreation, eco-tourism, research, livestock	burning, resource extraction, pollution	2007-09-08	Some red burning, illegal fhishing and peachers, illegal garbage disposal	168.4	15.3704
2015-05-11	3185.43	33	12	2	5	2	16	10	31	3065.4	102.756	2	0.00201613	1.20083	0	0	18.3971	vransko	29.4751	10.1882	3.58895	0.628821	0.181905	0.0244839	0	50.9659	4.9466	0	0.393025	0.00645738	5764.72	27936	4.84603	3	0	POLYGON ((15.540344970743831 43.952883856404924, 15.540434680815906 43.95275570031538, 15.541101091941869 43.952396863624415, 15.542267312086835 43.952255892195694, 15.542908092534503 43.952089289189416, 15.543728291327625 43.95203802693345, 15.5442665463641 43.95182016167115, 15.544651014632677 43.95148695565854, 15.545663448009748 43.949295486797325, 15.546483646802926 43.947655089211025, 15.54…	Vransko Lake	Croatia	7	5748	biodiversity, flood control, water quality regulation, recreation, eco-tourism, research, livestock	burning, resource extraction, pollution	2007-09-08	Some red burning, illegal fhishing and peachers, illegal garbage disposal	254.5	19.7642
2015-05-18	3031.04	32	7	19	3	4	0	10	25	2944.13	121.242	7	0.0451613	9.20451	0	0	21.835	vransko	29.4751	10.1882	3.58895	0.628821	0.181905	0.0244839	0	50.9659	4.9466	0	0.393025	0.00645738	5764.72	27936	4.84603	3	0	POLYGON ((15.540344970743831 43.952883856404924, 15.540434680815906 43.95275570031538, 15.541101091941869 43.952396863624415, 15.542267312086835 43.952255892195694, 15.542908092534503 43.952089289189416, 15.543728291327625 43.95203802693345, 15.5442665463641 43.95182016167115, 15.544651014632677 43.95148695565854, 15.545663448009748 43.949295486797325, 15.546483646802926 43.947655089211025, 15.54…	Vransko Lake	Croatia	7	5748	biodiversity, flood control, water quality regulation, recreation, eco-tourism, research, livestock	burning, resource extraction, pollution	2007-09-08	Some red burning, illegal fhishing and peachers, illegal garbage disposal	264.2	19.9993
2015-05-23	3016.03	27	15	4	4	4	5	14	25	2908	120.641	2	0.00307692	1.47745	0	87	14.6436	vransko	29.4751	10.1882	3.58895	0.628821	0.181905	0.0244839	0	50.9659	4.9466	0	0.393025	0.00645738	5764.72	27936	4.84603	3	0	POLYGON ((15.540344970743831 43.952883856404924, 15.540434680815906 43.95275570031538, 15.541101091941869 43.952396863624415, 15.542267312086835 43.952255892195694, 15.542908092534503 43.952089289189416, 15.543728291327625 43.95203802693345, 15.5442665463641 43.95182016167115, 15.544651014632677 43.95148695565854, 15.545663448009748 43.949295486797325, 15.546483646802926 43.947655089211025, 15.54…	Vransko Lake	Croatia	7	5748	biodiversity, flood control, water quality regulation, recreation, eco-tourism, research, livestock	burning, resource extraction, pollution	2007-09-08	Some red burning, illegal fhishing and peachers, illegal garbage disposal	397.3	18.6595
2015-05-30	2963.58	28	6	11	4	5	1	12	20	2901.05	148.179	8	0.0598291	11.7963	0.185605	0	19.095	vransko	29.4751	10.1882	3.58895	0.628821	0.181905	0.0244839	0	50.9659	4.9466	0	0.393025	0.00645738	5764.72	27936	4.84603	3	0	POLYGON ((15.540344970743831 43.952883856404924, 15.540434680815906 43.95275570031538, 15.541101091941869 43.952396863624415, 15.542267312086835 43.952255892195694, 15.542908092534503 43.952089289189416, 15.543728291327625 43.95203802693345, 15.5442665463641 43.95182016167115, 15.544651014632677 43.95148695565854, 15.545663448009748 43.949295486797325, 15.546483646802926 43.947655089211025, 15.54…	Vransko Lake	Croatia	7	5748	biodiversity, flood control, water quality regulation, recreation, eco-tourism, research, livestock	burning, resource extraction, pollution	2007-09-08	Some red burning, illegal fhishing and peachers, illegal garbage disposal	288.2	16.9404
2015-06-04	3053.71	48	15	7	13	14	17	11	38	2898.28	80.3608	10	0.0333025	9.82211	0.145547	0	25.1429	vransko	29.4751	10.1882	3.58895	0.628821	0.181905	0.0244839	0	50.9659	4.9466	0	0.393025	0.00645738	5764.72	27936	4.84603	3	0	POLYGON ((15.540344970743831 43.952883856404924, 15.540434680815906 43.95275570031538, 15.541101091941869 43.952396863624415, 15.542267312086835 43.952255892195694, 15.542908092534503 43.952089289189416, 15.543728291327625 43.95203802693345, 15.5442665463641 43.95182016167115, 15.544651014632677 43.95148695565854, 15.545663448009748 43.949295486797325, 15.546483646802926 43.947655089211025, 15.54…	Vransko Lake	Croatia	7	5748	biodiversity, flood control, water quality regulation, recreation, eco-tourism, research, livestock	burning, resource extraction, pollution	2007-09-08	Some red burning, illegal fhishing and peachers, illegal garbage disposal	0	21.1335
2015-06-11	2940.16	26	16	3	8	7	0	15	20	2879.91	147.008	6	0.05	9.67162	0	0	24.0943	vransko	29.4751	10.1882	3.58895	0.628821	0.181905	0.0244839	0	50.9659	4.9466	0	0.393025	0.00645738	5764.72	27936	4.84603	3	0	POLYGON ((15.540344970743831 43.952883856404924, 15.540434680815906 43.95275570031538, 15.541101091941869 43.952396863624415, 15.542267312086835 43.952255892195694, 15.542908092534503 43.952089289189416, 15.543728291327625 43.95203802693345, 15.5442665463641 43.95182016167115, 15.544651014632677 43.95148695565854, 15.545663448009748 43.949295486797325, 15.546483646802926 43.947655089211025, 15.54…	Vransko Lake	Croatia	7	5748	biodiversity, flood control, water quality regulation, recreation, eco-tourism, research, livestock	burning, resource extraction, pollution	2007-09-08	Some red burning, illegal fhishing and peachers, illegal garbage disposal	0	24.2361
2015-06-23	2935.26	18	16	2	4	2	2	10	17	2873.76	172.662	1	0	1.28963	0	0	21.8343	vransko	29.4751	10.1882	3.58895	0.628821	0.181905	0.0244839	0	50.9659	4.9466	0	0.393025	0.00645738	5764.72	27936	4.84603	3	0	POLYGON ((15.540344970743831 43.952883856404924, 15.540434680815906 43.95275570031538, 15.541101091941869 43.952396863624415, 15.542267312086835 43.952255892195694, 15.542908092534503 43.952089289189416, 15.543728291327625 43.95203802693345, 15.5442665463641 43.95182016167115, 15.544651014632677 43.95148695565854, 15.545663448009748 43.949295486797325, 15.546483646802926 43.947655089211025, 15.54…	Vransko Lake	Croatia	7	5748	biodiversity, flood control, water quality regulation, recreation, eco-tourism, research, livestock	burning, resource extraction, pollution	2007-09-08	Some red burning, illegal fhishing and peachers, illegal garbage disposal	205.9	20.6045
2015-07-10	2970.56	45	9	4	4	2	28	9	38	2796.48	78.1726	7	0.0179704	3.80229	0.556249	0	24.3336	vransko	29.4751	10.1882	3.58895	0.628821	0.181905	0.0244839	0	50.9659	4.9466	0	0.393025	0.00645738	5764.72	27936	4.84603	3	0	POLYGON ((15.540344970743831 43.952883856404924, 15.540434680815906 43.95275570031538, 15.541101091941869 43.952396863624415, 15.542267312086835 43.952255892195694, 15.542908092534503 43.952089289189416, 15.543728291327625 43.95203802693345, 15.5442665463641 43.95182016167115, 15.544651014632677 43.95148695565854, 15.545663448009748 43.949295486797325, 15.546483646802926 43.947655089211025, 15.54…	Vransko Lake	Croatia	7	5748	biodiversity, flood control, water quality regulation, recreation, eco-tourism, research, livestock	burning, resource extraction, pollution	2007-09-08	Some red burning, illegal fhishing and peachers, illegal garbage disposal	7.8	26.4441
2015-07-17	2940.36	27	6	11	2	5	1	13	25	2846.5	117.614	2	0	1.26626	0.5	0	29.0636	vransko	29.4751	10.1882	3.58895	0.628821	0.181905	0.0244839	0	50.9659	4.9466	0	0.393025	0.00645738	5764.72	27936	4.84603	3	0	POLYGON ((15.540344970743831 43.952883856404924, 15.540434680815906 43.95275570031538, 15.541101091941869 43.952396863624415, 15.542267312086835 43.952255892195694, 15.542908092534503 43.952089289189416, 15.543728291327625 43.95203802693345, 15.5442665463641 43.95182016167115, 15.544651014632677 43.95148695565854, 15.545663448009748 43.949295486797325, 15.546483646802926 43.947655089211025, 15.54…	Vransko Lake	Croatia	7	5748	biodiversity, flood control, water quality regulation, recreation, eco-tourism, research, livestock	burning, resource extraction, pollution	2007-09-08	Some red burning, illegal fhishing and peachers, illegal garbage disposal	110.1	26.7792
2015-07-22	3046.65	45	13	3	6	4	23	13	44	2828.95	69.2419	1	0	0.498247	0	0	29.5471	vransko	29.4751	10.1882	3.58895	0.628821	0.181905	0.0244839	0	50.9659	4.9466	0	0.393025	0.00645738	5764.72	27936	4.84603	3	0	POLYGON ((15.540344970743831 43.952883856404924, 15.540434680815906 43.95275570031538, 15.541101091941869 43.952396863624415, 15.542267312086835 43.952255892195694, 15.542908092534503 43.952089289189416, 15.543728291327625 43.95203802693345, 15.5442665463641 43.95182016167115, 15.544651014632677 43.95148695565854, 15.545663448009748 43.949295486797325, 15.546483646802926 43.947655089211025, 15.54…	Vransko Lake	Croatia	7	5748	biodiversity, flood control, water quality regulation, recreation, eco-tourism, research, livestock	burning, resource extraction, pollution	2007-09-08	Some red burning, illegal fhishing and peachers, illegal garbage disposal	0	29.341
2015-07-29	2927.98	22	8	3	5	3	0	14	21	2845.93	139.427	1	0	0.78367	0	181.9	27.6257	vransko	29.4751	10.1882	3.58895	0.628821	0.181905	0.0244839	0	50.9659	4.9466	0	0.393025	0.00645738	5764.72	27936	4.84603	3	0	POLYGON ((15.540344970743831 43.952883856404924, 15.540434680815906 43.95275570031538, 15.541101091941869 43.952396863624415, 15.542267312086835 43.952255892195694, 15.542908092534503 43.952089289189416, 15.543728291327625 43.95203802693345, 15.5442665463641 43.95182016167115, 15.544651014632677 43.95148695565854, 15.545663448009748 43.949295486797325, 15.546483646802926 43.947655089211025, 15.54…	Vransko Lake	Croatia	7	5748	biodiversity, flood control, water quality regulation, recreation, eco-tourism, research, livestock	burning, resource extraction, pollution	2007-09-08	Some red burning, illegal fhishing and peachers, illegal garbage disposal	561.3	27.3121
2015-08-15	3027.76	42	8	5	3	4	21	13	40	2835.1	75.6939	2	0	0.936367	0.489899	0	26.1164	vransko	29.4751	10.1882	3.58895	0.628821	0.181905	0.0244839	0	50.9659	4.9466	0	0.393025	0.00645738	5764.72	27936	4.84603	3	0	POLYGON ((15.540344970743831 43.952883856404924, 15.540434680815906 43.95275570031538, 15.541101091941869 43.952396863624415, 15.542267312086835 43.952255892195694, 15.542908092534503 43.952089289189416, 15.543728291327625 43.95203802693345, 15.5442665463641 43.95182016167115, 15.544651014632677 43.95148695565854, 15.545663448009748 43.949295486797325, 15.546483646802926 43.947655089211025, 15.54…	Vransko Lake	Croatia	7	5748	biodiversity, flood control, water quality regulation, recreation, eco-tourism, research, livestock	burning, resource extraction, pollution	2007-09-08	Some red burning, illegal fhishing and peachers, illegal garbage disposal	0	27.4072
2015-08-22	2874.67	16	6	5	3	4	0	8	15	2825.15	191.645	1	0	1.09761	0	0	21.6293	vransko	29.4751	10.1882	3.58895	0.628821	0.181905	0.0244839	0	50.9659	4.9466	0	0.393025	0.00645738	5764.72	27936	4.84603	3	0	POLYGON ((15.540344970743831 43.952883856404924, 15.540434680815906 43.95275570031538, 15.541101091941869 43.952396863624415, 15.542267312086835 43.952255892195694, 15.542908092534503 43.952089289189416, 15.543728291327625 43.95203802693345, 15.5442665463641 43.95182016167115, 15.544651014632677 43.95148695565854, 15.545663448009748 43.949295486797325, 15.546483646802926 43.947655089211025, 15.54…	Vransko Lake	Croatia	7	5748	biodiversity, flood control, water quality regulation, recreation, eco-tourism, research, livestock	burning, resource extraction, pollution	2007-09-08	Some red burning, illegal fhishing and peachers, illegal garbage disposal	317.6	21.3999
2015-08-27	2949.47	33	4	2	2	2	17	12	32	2814.43	92.171	1	0	0.685097	0	0	23.7743	vransko	29.4751	10.1882	3.58895	0.628821	0.181905	0.0244839	0	50.9659	4.9466	0	0.393025	0.00645738	5764.72	27936	4.84603	3	0	POLYGON ((15.540344970743831 43.952883856404924, 15.540434680815906 43.95275570031538, 15.541101091941869 43.952396863624415, 15.542267312086835 43.952255892195694, 15.542908092534503 43.952089289189416, 15.543728291327625 43.95203802693345, 15.5442665463641 43.95182016167115, 15.544651014632677 43.95148695565854, 15.545663448009748 43.949295486797325, 15.546483646802926 43.947655089211025, 15.54…	Vransko Lake	Croatia	7	5748	biodiversity, flood control, water quality regulation, recreation, eco-tourism, research, livestock	burning, resource extraction, pollution	2007-09-08	Some red burning, illegal fhishing and peachers, illegal garbage disposal	12.9	22.7531
2015-09-03	2891.8	19	8	4	3	2	1	11	18	2832.2	160.655	1	0	1.21799	0	0	24.435	vransko	29.4751	10.1882	3.58895	0.628821	0.181905	0.0244839	0	50.9659	4.9466	0	0.393025	0.00645738	5764.72	27936	4.84603	3	0	POLYGON ((15.540344970743831 43.952883856404924, 15.540434680815906 43.95275570031538, 15.541101091941869 43.952396863624415, 15.542267312086835 43.952255892195694, 15.542908092534503 43.952089289189416, 15.543728291327625 43.95203802693345, 15.5442665463641 43.95182016167115, 15.544651014632677 43.95148695565854, 15.545663448009748 43.949295486797325, 15.546483646802926 43.947655089211025, 15.54…	Vransko Lake	Croatia	7	5748	biodiversity, flood control, water quality regulation, recreation, eco-tourism, research, livestock	burning, resource extraction, pollution	2007-09-08	Some red burning, illegal fhishing and peachers, illegal garbage disposal	0	25.0933
2015-09-15	2905.45	21	3	2	1	2	5	13	21	2838.85	138.355	0	0	0	0	0	23.89	vransko	29.4751	10.1882	3.58895	0.628821	0.181905	0.0244839	0	50.9659	4.9466	0	0.393025	0.00645738	5764.72	27936	4.84603	3	0	POLYGON ((15.540344970743831 43.952883856404924, 15.540434680815906 43.95275570031538, 15.541101091941869 43.952396863624415, 15.542267312086835 43.952255892195694, 15.542908092534503 43.952089289189416, 15.543728291327625 43.95203802693345, 15.5442665463641 43.95182016167115, 15.544651014632677 43.95148695565854, 15.545663448009748 43.949295486797325, 15.546483646802926 43.947655089211025, 15.54…	Vransko Lake	Croatia	7	5748	biodiversity, flood control, water quality regulation, recreation, eco-tourism, research, livestock	burning, resource extraction, pollution	2007-09-08	Some red burning, illegal fhishing and peachers, illegal garbage disposal	27.5	20.4937
2015-09-20	2934.67	29	9	3	4	3	12	10	28	2835.04	104.81	1	0	0.782967	0	55.6	20.2736	vransko	29.4751	10.1882	3.58895	0.628821	0.181905	0.0244839	0	50.9659	4.9466	0	0.393025	0.00645738	5764.72	27936	4.84603	3	0	POLYGON ((15.540344970743831 43.952883856404924, 15.540434680815906 43.95275570031538, 15.541101091941869 43.952396863624415, 15.542267312086835 43.952255892195694, 15.542908092534503 43.952089289189416, 15.543728291327625 43.95203802693345, 15.5442665463641 43.95182016167115, 15.544651014632677 43.95148695565854, 15.545663448009748 43.949295486797325, 15.546483646802926 43.947655089211025, 15.54…	Vransko Lake	Croatia	7	5748	biodiversity, flood control, water quality regulation, recreation, eco-tourism, research, livestock	burning, resource extraction, pollution	2007-09-08	Some red burning, illegal fhishing and peachers, illegal garbage disposal	127.3	24.0772
2015-10-02	2926.23	37	8	8	5	5	7	17	33	2794.12	88.6738	4	0.0047619	2.37907	0.375037	0	18.8357	vransko	29.4751	10.1882	3.58895	0.628821	0.181905	0.0244839	0	50.9659	4.9466	0	0.393025	0.00645738	5764.72	27936	4.84603	3	0	POLYGON ((15.540344970743831 43.952883856404924, 15.540434680815906 43.95275570031538, 15.541101091941869 43.952396863624415, 15.542267312086835 43.952255892195694, 15.542908092534503 43.952089289189416, 15.543728291327625 43.95203802693345, 15.5442665463641 43.95182016167115, 15.544651014632677 43.95148695565854, 15.545663448009748 43.949295486797325, 15.546483646802926 43.947655089211025, 15.54…	Vransko Lake	Croatia	7	5748	biodiversity, flood control, water quality regulation, recreation, eco-tourism, research, livestock	burning, resource extraction, pollution	2007-09-08	Some red burning, illegal fhishing and peachers, illegal garbage disposal	412	16.8665
2015-10-14	2986.99	32	14	4	6	5	8	14	31	2861.71	96.3545	1	0	0.530718	0	19	17.7357	vransko	29.4751	10.1882	3.58895	0.628821	0.181905	0.0244839	0	50.9659	4.9466	0	0.393025	0.00645738	5764.72	27936	4.84603	3	0	POLYGON ((15.540344970743831 43.952883856404924, 15.540434680815906 43.95275570031538, 15.541101091941869 43.952396863624415, 15.542267312086835 43.952255892195694, 15.542908092534503 43.952089289189416, 15.543728291327625 43.95203802693345, 15.5442665463641 43.95182016167115, 15.544651014632677 43.95148695565854, 15.545663448009748 43.949295486797325, 15.546483646802926 43.947655089211025, 15.54…	Vransko Lake	Croatia	7	5748	biodiversity, flood control, water quality regulation, recreation, eco-tourism, research, livestock	burning, resource extraction, pollution	2007-09-08	Some red burning, illegal fhishing and peachers, illegal garbage disposal	458.5	16.2087
2015-10-21	2781.05	10	0	7	0	3	0	3	9	2754.23	309.006	1	0	1.82815	0	0	12.1686	vransko	29.4751	10.1882	3.58895	0.628821	0.181905	0.0244839	0	50.9659	4.9466	0	0.393025	0.00645738	5764.72	27936	4.84603	3	0	POLYGON ((15.540344970743831 43.952883856404924, 15.540434680815906 43.95275570031538, 15.541101091941869 43.952396863624415, 15.542267312086835 43.952255892195694, 15.542908092534503 43.952089289189416, 15.543728291327625 43.95203802693345, 15.5442665463641 43.95182016167115, 15.544651014632677 43.95148695565854, 15.545663448009748 43.949295486797325, 15.546483646802926 43.947655089211025, 15.54…	Vransko Lake	Croatia	7	5748	biodiversity, flood control, water quality regulation, recreation, eco-tourism, research, livestock	burning, resource extraction, pollution	2007-09-08	Some red burning, illegal fhishing and peachers, illegal garbage disposal	321	14.3527
2015-10-26	2932.54	23	6	3	3	2	15	2	22	2840.72	133.297	1	0	0.748112	0	0	13.7371	vransko	29.4751	10.1882	3.58895	0.628821	0.181905	0.0244839	0	50.9659	4.9466	0	0.393025	0.00645738	5764.72	27936	4.84603	3	0	POLYGON ((15.540344970743831 43.952883856404924, 15.540434680815906 43.95275570031538, 15.541101091941869 43.952396863624415, 15.542267312086835 43.952255892195694, 15.542908092534503 43.952089289189416, 15.543728291327625 43.95203802693345, 15.5442665463641 43.95182016167115, 15.544651014632677 43.95148695565854, 15.545663448009748 43.949295486797325, 15.546483646802926 43.947655089211025, 15.54…	Vransko Lake	Croatia	7	5748	biodiversity, flood control, water quality regulation, recreation, eco-tourism, research, livestock	burning, resource extraction, pollution	2007-09-08	Some red burning, illegal fhishing and peachers, illegal garbage disposal	0	12.9006
2015-11-02	2913.9	16	4	8	2	2	2	4	11	2879.39	264.9	5	0.12381	9.65213	0.177442	0	10.9929	vransko	29.4751	10.1882	3.58895	0.628821	0.181905	0.0244839	0	50.9659	4.9466	0	0.393025	0.00645738	5764.72	27936	4.84603	3	0	POLYGON ((15.540344970743831 43.952883856404924, 15.540434680815906 43.95275570031538, 15.541101091941869 43.952396863624415, 15.542267312086835 43.952255892195694, 15.542908092534503 43.952089289189416, 15.543728291327625 43.95203802693345, 15.5442665463641 43.95182016167115, 15.544651014632677 43.95148695565854, 15.545663448009748 43.949295486797325, 15.546483646802926 43.947655089211025, 15.54…	Vransko Lake	Croatia	7	5748	biodiversity, flood control, water quality regulation, recreation, eco-tourism, research, livestock	burning, resource extraction, pollution	2007-09-08	Some red burning, illegal fhishing and peachers, illegal garbage disposal	0	13.7608
2015-11-07	2922.17	32	12	6	6	8	17	3	28	2809.74	104.363	4	0.0129032	3.72854	0	43	14.9179	vransko	29.4751	10.1882	3.58895	0.628821	0.181905	0.0244839	0	50.9659	4.9466	0	0.393025	0.00645738	5764.72	27936	4.84603	3	0	POLYGON ((15.540344970743831 43.952883856404924, 15.540434680815906 43.95275570031538, 15.541101091941869 43.952396863624415, 15.542267312086835 43.952255892195694, 15.542908092534503 43.952089289189416, 15.543728291327625 43.95203802693345, 15.5442665463641 43.95182016167115, 15.544651014632677 43.95148695565854, 15.545663448009748 43.949295486797325, 15.546483646802926 43.947655089211025, 15.54…	Vransko Lake	Croatia	7	5748	biodiversity, flood control, water quality regulation, recreation, eco-tourism, research, livestock	burning, resource extraction, pollution	2007-09-08	Some red burning, illegal fhishing and peachers, illegal garbage disposal	55.5	12.7568
2015-11-14	2942.15	22	9	8	5	5	0	9	18	2892.51	163.453	4	0.0285714	5.15304	0	0	14.0036	vransko	29.4751	10.1882	3.58895	0.628821	0.181905	0.0244839	0	50.9659	4.9466	0	0.393025	0.00645738	5764.72	27936	4.84603	3	0	POLYGON ((15.540344970743831 43.952883856404924, 15.540434680815906 43.95275570031538, 15.541101091941869 43.952396863624415, 15.542267312086835 43.952255892195694, 15.542908092534503 43.952089289189416, 15.543728291327625 43.95203802693345, 15.5442665463641 43.95182016167115, 15.544651014632677 43.95148695565854, 15.545663448009748 43.949295486797325, 15.546483646802926 43.947655089211025, 15.54…	Vransko Lake	Croatia	7	5748	biodiversity, flood control, water quality regulation, recreation, eco-tourism, research, livestock	burning, resource extraction, pollution	2007-09-08	Some red burning, illegal fhishing and peachers, illegal garbage disposal	0	13.79
2015-11-26	2805.86	6	10	2	2	2	0	2	3	2796.67	935.287	3	0.3	13.8276	0	0	6.28857	vransko	29.4751	10.1882	3.58895	0.628821	0.181905	0.0244839	0	50.9659	4.9466	0	0.393025	0.00645738	5764.72	27936	4.84603	3	0	POLYGON ((15.540344970743831 43.952883856404924, 15.540434680815906 43.95275570031538, 15.541101091941869 43.952396863624415, 15.542267312086835 43.952255892195694, 15.542908092534503 43.952089289189416, 15.543728291327625 43.95203802693345, 15.5442665463641 43.95182016167115, 15.544651014632677 43.95148695565854, 15.545663448009748 43.949295486797325, 15.546483646802926 43.947655089211025, 15.54…	Vransko Lake	Croatia	7	5748	biodiversity, flood control, water quality regulation, recreation, eco-tourism, research, livestock	burning, resource extraction, pollution	2007-09-08	Some red burning, illegal fhishing and peachers, illegal garbage disposal	488.4	8.16265
2015-12-01	2931.96	14	4	1	3	3	8	2	13	2891.63	225.535	1	0	1.26636	0	0	11.1064	vransko	29.4751	10.1882	3.58895	0.628821	0.181905	0.0244839	0	50.9659	4.9466	0	0.393025	0.00645738	5764.72	27936	4.84603	3	0	POLYGON ((15.540344970743831 43.952883856404924, 15.540434680815906 43.95275570031538, 15.541101091941869 43.952396863624415, 15.542267312086835 43.952255892195694, 15.542908092534503 43.952089289189416, 15.543728291327625 43.95203802693345, 15.5442665463641 43.95182016167115, 15.544651014632677 43.95148695565854, 15.545663448009748 43.949295486797325, 15.546483646802926 43.947655089211025, 15.54…	Vransko Lake	Croatia	7	5748	biodiversity, flood control, water quality regulation, recreation, eco-tourism, research, livestock	burning, resource extraction, pollution	2007-09-08	Some red burning, illegal fhishing and peachers, illegal garbage disposal	117.2	7.56408
2015-12-08	2883.71	8	4	3	3	2	0	2	6	2861.95	480.619	2	0.047619	6.27523	0	0	8.38071	vransko	29.4751	10.1882	3.58895	0.628821	0.181905	0.0244839	0	50.9659	4.9466	0	0.393025	0.00645738	5764.72	27936	4.84603	3	0	POLYGON ((15.540344970743831 43.952883856404924, 15.540434680815906 43.95275570031538, 15.541101091941869 43.952396863624415, 15.542267312086835 43.952255892195694, 15.542908092534503 43.952089289189416, 15.543728291327625 43.95203802693345, 15.5442665463641 43.95182016167115, 15.544651014632677 43.95148695565854, 15.545663448009748 43.949295486797325, 15.546483646802926 43.947655089211025, 15.54…	Vransko Lake	Croatia	7	5748	biodiversity, flood control, water quality regulation, recreation, eco-tourism, research, livestock	burning, resource extraction, pollution	2007-09-08	Some red burning, illegal fhishing and peachers, illegal garbage disposal	9.2	9.55775
2015-12-20	2894.23	9	6	1	4	5	2	2	7	2875.41	413.461	2	0.0357143	4.80129	0	0	8.88143	vransko	29.4751	10.1882	3.58895	0.628821	0.181905	0.0244839	0	50.9659	4.9466	0	0.393025	0.00645738	5764.72	27936	4.84603	3	0	POLYGON ((15.540344970743831 43.952883856404924, 15.540434680815906 43.95275570031538, 15.541101091941869 43.952396863624415, 15.542267312086835 43.952255892195694, 15.542908092534503 43.952089289189416, 15.543728291327625 43.95203802693345, 15.5442665463641 43.95182016167115, 15.544651014632677 43.95148695565854, 15.545663448009748 43.949295486797325, 15.546483646802926 43.947655089211025, 15.54…	Vransko Lake	Croatia	7	5748	biodiversity, flood control, water quality regulation, recreation, eco-tourism, research, livestock	burning, resource extraction, pollution	2007-09-08	Some red burning, illegal fhishing and peachers, illegal garbage disposal	58.8	8.67775
2015-12-25	2920.2	15	6	1	2	3	9	3	14	2876	208.586	1	0	1.17601	0	0	9.68286	vransko	29.4751	10.1882	3.58895	0.628821	0.181905	0.0244839	0	50.9659	4.9466	0	0.393025	0.00645738	5764.72	27936	4.84603	3	0	POLYGON ((15.540344970743831 43.952883856404924, 15.540434680815906 43.95275570031538, 15.541101091941869 43.952396863624415, 15.542267312086835 43.952255892195694, 15.542908092534503 43.952089289189416, 15.543728291327625 43.95203802693345, 15.5442665463641 43.95182016167115, 15.544651014632677 43.95148695565854, 15.545663448009748 43.949295486797325, 15.546483646802926 43.947655089211025, 15.54…	Vransko Lake	Croatia	7	5748	biodiversity, flood control, water quality regulation, recreation, eco-tourism, research, livestock	burning, resource extraction, pollution	2007-09-08	Some red burning, illegal fhishing and peachers, illegal garbage disposal	17.6	9.54337
2016-01-01	2931.78	12	3	5	2	2	2	3	6	2917.65	488.63	6	0.272727	21.9839	0	0	4.875	vransko	29.4751	10.1882	3.58895	0.628821	0.181905	0.0244839	0	50.9659	4.9466	0	0.393025	0.00645738	5764.72	27936	4.84603	3	0	POLYGON ((15.540344970743831 43.952883856404924, 15.540434680815906 43.95275570031538, 15.541101091941869 43.952396863624415, 15.542267312086835 43.952255892195694, 15.542908092534503 43.952089289189416, 15.543728291327625 43.95203802693345, 15.5442665463641 43.95182016167115, 15.544651014632677 43.95148695565854, 15.545663448009748 43.949295486797325, 15.546483646802926 43.947655089211025, 15.54…	Vransko Lake	Croatia	7	5748	biodiversity, flood control, water quality regulation, recreation, eco-tourism, research, livestock	burning, resource extraction, pollution	2007-09-08	Some red burning, illegal fhishing and peachers, illegal garbage disposal	18.6	6.51306
2016-01-13	2965.32	12	8	3	5	4	1	3	5	2948.39	593.065	7	0.381818	28.056	0	33.5	9.11286	vransko	29.4751	10.1882	3.58895	0.628821	0.181905	0.0244839	0	50.9659	4.9466	0	0.393025	0.00645738	5764.72	27936	4.84603	3	0	POLYGON ((15.540344970743831 43.952883856404924, 15.540434680815906 43.95275570031538, 15.541101091941869 43.952396863624415, 15.542267312086835 43.952255892195694, 15.542908092534503 43.952089289189416, 15.543728291327625 43.95203802693345, 15.5442665463641 43.95182016167115, 15.544651014632677 43.95148695565854, 15.545663448009748 43.949295486797325, 15.546483646802926 43.947655089211025, 15.54…	Vransko Lake	Croatia	7	5748	biodiversity, flood control, water quality regulation, recreation, eco-tourism, research, livestock	burning, resource extraction, pollution	2007-09-08	Some red burning, illegal fhishing and peachers, illegal garbage disposal	453.1	11.6144
2016-01-18	2860.37	15	9	4	1	2	8	2	14	2804.65	204.312	1	0	1.56597	0	0	0.504286	vransko	29.4751	10.1882	3.58895	0.628821	0.181905	0.0244839	0	50.9659	4.9466	0	0.393025	0.00645738	5764.72	27936	4.84603	3	0	POLYGON ((15.540344970743831 43.952883856404924, 15.540434680815906 43.95275570031538, 15.541101091941869 43.952396863624415, 15.542267312086835 43.952255892195694, 15.542908092534503 43.952089289189416, 15.543728291327625 43.95203802693345, 15.5442665463641 43.95182016167115, 15.544651014632677 43.95148695565854, 15.545663448009748 43.949295486797325, 15.546483646802926 43.947655089211025, 15.54…	Vransko Lake	Croatia	7	5748	biodiversity, flood control, water quality regulation, recreation, eco-tourism, research, livestock	burning, resource extraction, pollution	2007-09-08	Some red burning, illegal fhishing and peachers, illegal garbage disposal	398.8	6.44816
2016-01-25	2932.54	14	3	9	2	2	0	3	10	2909.6	293.254	4	0.0384615	7.65589	0.408146	15.1	6.60929	vransko	29.4751	10.1882	3.58895	0.628821	0.181905	0.0244839	0	50.9659	4.9466	0	0.393025	0.00645738	5764.72	27936	4.84603	3	0	POLYGON ((15.540344970743831 43.952883856404924, 15.540434680815906 43.95275570031538, 15.541101091941869 43.952396863624415, 15.542267312086835 43.952255892195694, 15.542908092534503 43.952089289189416, 15.543728291327625 43.95203802693345, 15.5442665463641 43.95182016167115, 15.544651014632677 43.95148695565854, 15.545663448009748 43.949295486797325, 15.546483646802926 43.947655089211025, 15.54…	Vransko Lake	Croatia	7	5748	biodiversity, flood control, water quality regulation, recreation, eco-tourism, research, livestock	burning, resource extraction, pollution	2007-09-08	Some red burning, illegal fhishing and peachers, illegal garbage disposal	33.5	4.15112
2016-02-06	2973.49	15	11	5	6	5	2	2	8	2921.84	371.686	7	0.164835	16.9247	0.252462	0	6.91786	vransko	29.4751	10.1882	3.58895	0.628821	0.181905	0.0244839	0	50.9659	4.9466	0	0.393025	0.00645738	5764.72	27936	4.84603	3	0	POLYGON ((15.540344970743831 43.952883856404924, 15.540434680815906 43.95275570031538, 15.541101091941869 43.952396863624415, 15.542267312086835 43.952255892195694, 15.542908092534503 43.952089289189416, 15.543728291327625 43.95203802693345, 15.5442665463641 43.95182016167115, 15.544651014632677 43.95148695565854, 15.545663448009748 43.949295486797325, 15.546483646802926 43.947655089211025, 15.54…	Vransko Lake	Croatia	7	5748	biodiversity, flood control, water quality regulation, recreation, eco-tourism, research, livestock	burning, resource extraction, pollution	2007-09-08	Some red burning, illegal fhishing and peachers, illegal garbage disposal	84.2	9.85347
2016-02-11	2869.09	17	12	5	1	2	9	2	16	2824.71	179.318	1	0	1.02829	0	0	5.71286	vransko	29.4751	10.1882	3.58895	0.628821	0.181905	0.0244839	0	50.9659	4.9466	0	0.393025	0.00645738	5764.72	27936	4.84603	3	0	POLYGON ((15.540344970743831 43.952883856404924, 15.540434680815906 43.95275570031538, 15.541101091941869 43.952396863624415, 15.542267312086835 43.952255892195694, 15.542908092534503 43.952089289189416, 15.543728291327625 43.95203802693345, 15.5442665463641 43.95182016167115, 15.544651014632677 43.95148695565854, 15.545663448009748 43.949295486797325, 15.546483646802926 43.947655089211025, 15.54…	Vransko Lake	Croatia	7	5748	biodiversity, flood control, water quality regulation, recreation, eco-tourism, research, livestock	burning, resource extraction, pollution	2007-09-08	Some red burning, illegal fhishing and peachers, illegal garbage disposal	290.1	9.0398
2016-02-18	2971.32	11	5	6	1	1	1	3	7	2919.5	424.475	4	0.133333	12.39	0	0	10.6171	vransko	29.4751	10.1882	3.58895	0.628821	0.181905	0.0244839	0	50.9659	4.9466	0	0.393025	0.00645738	5764.72	27936	4.84603	3	0	POLYGON ((15.540344970743831 43.952883856404924, 15.540434680815906 43.95275570031538, 15.541101091941869 43.952396863624415, 15.542267312086835 43.952255892195694, 15.542908092534503 43.952089289189416, 15.543728291327625 43.95203802693345, 15.5442665463641 43.95182016167115, 15.544651014632677 43.95148695565854, 15.545663448009748 43.949295486797325, 15.546483646802926 43.947655089211025, 15.54…	Vransko Lake	Croatia	7	5748	biodiversity, flood control, water quality regulation, recreation, eco-tourism, research, livestock	burning, resource extraction, pollution	2007-09-08	Some red burning, illegal fhishing and peachers, illegal garbage disposal	501.9	11.4287
2016-03-01	2966.84	11	8	5	3	4	1	2	6	2946.54	494.473	5	0.133333	13.2024	0.332477	0	9.64571	vransko	29.4751	10.1882	3.58895	0.628821	0.181905	0.0244839	0	50.9659	4.9466	0	0.393025	0.00645738	5764.72	27936	4.84603	3	0	POLYGON ((15.540344970743831 43.952883856404924, 15.540434680815906 43.95275570031538, 15.541101091941869 43.952396863624415, 15.542267312086835 43.952255892195694, 15.542908092534503 43.952089289189416, 15.543728291327625 43.95203802693345, 15.5442665463641 43.95182016167115, 15.544651014632677 43.95148695565854, 15.545663448009748 43.949295486797325, 15.546483646802926 43.947655089211025, 15.54…	Vransko Lake	Croatia	7	5748	biodiversity, flood control, water quality regulation, recreation, eco-tourism, research, livestock	burning, resource extraction, pollution	2007-09-08	Some red burning, illegal fhishing and peachers, illegal garbage disposal	394.8	10.2973
2016-03-06	2976.61	12	7	1	2	2	7	2	10	2945.67	297.661	2	0.0181818	3.99497	0	15.3	10.4507	vransko	29.4751	10.1882	3.58895	0.628821	0.181905	0.0244839	0	50.9659	4.9466	0	0.393025	0.00645738	5764.72	27936	4.84603	3	0	POLYGON ((15.540344970743831 43.952883856404924, 15.540434680815906 43.95275570031538, 15.541101091941869 43.952396863624415, 15.542267312086835 43.952255892195694, 15.542908092534503 43.952089289189416, 15.543728291327625 43.95203802693345, 15.5442665463641 43.95182016167115, 15.544651014632677 43.95148695565854, 15.545663448009748 43.949295486797325, 15.546483646802926 43.947655089211025, 15.54…	Vransko Lake	Croatia	7	5748	biodiversity, flood control, water quality regulation, recreation, eco-tourism, research, livestock	burning, resource extraction, pollution	2007-09-08	Some red burning, illegal fhishing and peachers, illegal garbage disposal	292.7	9.37408
2016-03-13	2898.44	14	4	4	2	3	5	3	8	2874.11	362.305	6	0.128205	13.6432	0.227	0	11.3521	vransko	29.4751	10.1882	3.58895	0.628821	0.181905	0.0244839	0	50.9659	4.9466	0	0.393025	0.00645738	5764.72	27936	4.84603	3	0	POLYGON ((15.540344970743831 43.952883856404924, 15.540434680815906 43.95275570031538, 15.541101091941869 43.952396863624415, 15.542267312086835 43.952255892195694, 15.542908092534503 43.952089289189416, 15.543728291327625 43.95203802693345, 15.5442665463641 43.95182016167115, 15.544651014632677 43.95148695565854, 15.545663448009748 43.949295486797325, 15.546483646802926 43.947655089211025, 15.54…	Vransko Lake	Croatia	7	5748	biodiversity, flood control, water quality regulation, recreation, eco-tourism, research, livestock	burning, resource extraction, pollution	2007-09-08	Some red burning, illegal fhishing and peachers, illegal garbage disposal	116.4	9.48714
2016-03-25	2996.34	11	10	4	4	3	0	3	7	2973.66	428.049	4	0.133333	10.8172	2.22045e-16	0	9.69286	vransko	29.4751	10.1882	3.58895	0.628821	0.181905	0.0244839	0	50.9659	4.9466	0	0.393025	0.00645738	5764.72	27936	4.84603	3	0	POLYGON ((15.540344970743831 43.952883856404924, 15.540434680815906 43.95275570031538, 15.541101091941869 43.952396863624415, 15.542267312086835 43.952255892195694, 15.542908092534503 43.952089289189416, 15.543728291327625 43.95203802693345, 15.5442665463641 43.95182016167115, 15.544651014632677 43.95148695565854, 15.545663448009748 43.949295486797325, 15.546483646802926 43.947655089211025, 15.54…	Vransko Lake	Croatia	7	5748	biodiversity, flood control, water quality regulation, recreation, eco-tourism, research, livestock	burning, resource extraction, pollution	2007-09-08	Some red burning, illegal fhishing and peachers, illegal garbage disposal	192.4	10.4724
2016-03-30	2908.65	15	6	0	5	4	7	3	14	2866.03	207.76	1	0	1.17523	0	0	14.3807	vransko	29.4751	10.1882	3.58895	0.628821	0.181905	0.0244839	0	50.9659	4.9466	0	0.393025	0.00645738	5764.72	27936	4.84603	3	0	POLYGON ((15.540344970743831 43.952883856404924, 15.540434680815906 43.95275570031538, 15.541101091941869 43.952396863624415, 15.542267312086835 43.952255892195694, 15.542908092534503 43.952089289189416, 15.543728291327625 43.95203802693345, 15.5442665463641 43.95182016167115, 15.544651014632677 43.95148695565854, 15.545663448009748 43.949295486797325, 15.546483646802926 43.947655089211025, 15.54…	Vransko Lake	Croatia	7	5748	biodiversity, flood control, water quality regulation, recreation, eco-tourism, research, livestock	burning, resource extraction, pollution	2007-09-08	Some red burning, illegal fhishing and peachers, illegal garbage disposal	14.5	11.3153
2016-04-06	3127.94	15	6	8	4	3	1	2	7	3110.15	446.849	8	0.230769	21.9492	0.180158	0	15.8321	vransko	29.4751	10.1882	3.58895	0.628821	0.181905	0.0244839	0	50.9659	4.9466	0	0.393025	0.00645738	5764.72	27936	4.84603	3	0	POLYGON ((15.540344970743831 43.952883856404924, 15.540434680815906 43.95275570031538, 15.541101091941869 43.952396863624415, 15.542267312086835 43.952255892195694, 15.542908092534503 43.952089289189416, 15.543728291327625 43.95203802693345, 15.5442665463641 43.95182016167115, 15.544651014632677 43.95148695565854, 15.545663448009748 43.949295486797325, 15.546483646802926 43.947655089211025, 15.54…	Vransko Lake	Croatia	7	5748	biodiversity, flood control, water quality regulation, recreation, eco-tourism, research, livestock	burning, resource extraction, pollution	2007-09-08	Some red burning, illegal fhishing and peachers, illegal garbage disposal	26.1	15.1619
2016-04-18	3115.82	14	12	4	7	5	1	2	7	3098.56	445.117	7	0.333333	21.4393	0.204732	0	18.5171	vransko	29.4751	10.1882	3.58895	0.628821	0.181905	0.0244839	0	50.9659	4.9466	0	0.393025	0.00645738	5764.72	27936	4.84603	3	0	POLYGON ((15.540344970743831 43.952883856404924, 15.540434680815906 43.95275570031538, 15.541101091941869 43.952396863624415, 15.542267312086835 43.952255892195694, 15.542908092534503 43.952089289189416, 15.543728291327625 43.95203802693345, 15.5442665463641 43.95182016167115, 15.544651014632677 43.95148695565854, 15.545663448009748 43.949295486797325, 15.546483646802926 43.947655089211025, 15.54…	Vransko Lake	Croatia	7	5748	biodiversity, flood control, water quality regulation, recreation, eco-tourism, research, livestock	burning, resource extraction, pollution	2007-09-08	Some red burning, illegal fhishing and peachers, illegal garbage disposal	98.3	16.8611
2016-04-30	3047.8	13	10	7	4	4	0	2	7	3028.76	435.4	6	0.287879	17.8424	0.172492	125.1	13.6736	vransko	29.4751	10.1882	3.58895	0.628821	0.181905	0.0244839	0	50.9659	4.9466	0	0.393025	0.00645738	5764.72	27936	4.84603	3	0	POLYGON ((15.540344970743831 43.952883856404924, 15.540434680815906 43.95275570031538, 15.541101091941869 43.952396863624415, 15.542267312086835 43.952255892195694, 15.542908092534503 43.952089289189416, 15.543728291327625 43.95203802693345, 15.5442665463641 43.95182016167115, 15.544651014632677 43.95148695565854, 15.545663448009748 43.949295486797325, 15.546483646802926 43.947655089211025, 15.54…	Vransko Lake	Croatia	7	5748	biodiversity, flood control, water quality regulation, recreation, eco-tourism, research, livestock	burning, resource extraction, pollution	2007-09-08	Some red burning, illegal fhishing and peachers, illegal garbage disposal	345.1	12.1669
2016-05-12	2911.83	10	10	6	2	4	0	2	7	2893.3	415.976	3	0.0833333	7.68276	0	74.5	16.2843	vransko	29.4751	10.1882	3.58895	0.628821	0.181905	0.0244839	0	50.9659	4.9466	0	0.393025	0.00645738	5764.72	27936	4.84603	3	0	POLYGON ((15.540344970743831 43.952883856404924, 15.540434680815906 43.95275570031538, 15.541101091941869 43.952396863624415, 15.542267312086835 43.952255892195694, 15.542908092534503 43.952089289189416, 15.543728291327625 43.95203802693345, 15.5442665463641 43.95182016167115, 15.544651014632677 43.95148695565854, 15.545663448009748 43.949295486797325, 15.546483646802926 43.947655089211025, 15.54…	Vransko Lake	Croatia	7	5748	biodiversity, flood control, water quality regulation, recreation, eco-tourism, research, livestock	burning, resource extraction, pollution	2007-09-08	Some red burning, illegal fhishing and peachers, illegal garbage disposal	74.5	16.5898
2016-05-17	2657.92	29	4	13	6	4	5	5	20	2596.71	132.896	9	0.132275	13.8434	0.283704	0	15.0743	vransko	29.4751	10.1882	3.58895	0.628821	0.181905	0.0244839	0	50.9659	4.9466	0	0.393025	0.00645738	5764.72	27936	4.84603	3	0	POLYGON ((15.540344970743831 43.952883856404924, 15.540434680815906 43.95275570031538, 15.541101091941869 43.952396863624415, 15.542267312086835 43.952255892195694, 15.542908092534503 43.952089289189416, 15.543728291327625 43.95203802693345, 15.5442665463641 43.95182016167115, 15.544651014632677 43.95148695565854, 15.545663448009748 43.949295486797325, 15.546483646802926 43.947655089211025, 15.54…	Vransko Lake	Croatia	7	5748	biodiversity, flood control, water quality regulation, recreation, eco-tourism, research, livestock	burning, resource extraction, pollution	2007-09-08	Some red burning, illegal fhishing and peachers, illegal garbage disposal	543.6	15.6212
2016-05-24	2594.32	14	19	5	5	5	1	3	8	2568.28	324.29	6	0.192308	16.9635	0	123.1	14.7107	vransko	29.4751	10.1882	3.58895	0.628821	0.181905	0.0244839	0	50.9659	4.9466	0	0.393025	0.00645738	5764.72	27936	4.84603	3	0	POLYGON ((15.540344970743831 43.952883856404924, 15.540434680815906 43.95275570031538, 15.541101091941869 43.952396863624415, 15.542267312086835 43.952255892195694, 15.542908092534503 43.952089289189416, 15.543728291327625 43.95203802693345, 15.5442665463641 43.95182016167115, 15.544651014632677 43.95148695565854, 15.545663448009748 43.949295486797325, 15.546483646802926 43.947655089211025, 15.54…	Vransko Lake	Croatia	7	5748	biodiversity, flood control, water quality regulation, recreation, eco-tourism, research, livestock	burning, resource extraction, pollution	2007-09-08	Some red burning, illegal fhishing and peachers, illegal garbage disposal	123.1	17.0729
2016-05-29	2915.62	17	11	5	1	2	8	3	15	2864.83	194.374	2	0.00833333	2.40077	0	156.5	21.7136	vransko	29.4751	10.1882	3.58895	0.628821	0.181905	0.0244839	0	50.9659	4.9466	0	0.393025	0.00645738	5764.72	27936	4.84603	3	0	POLYGON ((15.540344970743831 43.952883856404924, 15.540434680815906 43.95275570031538, 15.541101091941869 43.952396863624415, 15.542267312086835 43.952255892195694, 15.542908092534503 43.952089289189416, 15.543728291327625 43.95203802693345, 15.5442665463641 43.95182016167115, 15.544651014632677 43.95148695565854, 15.545663448009748 43.949295486797325, 15.546483646802926 43.947655089211025, 15.54…	Vransko Lake	Croatia	7	5748	biodiversity, flood control, water quality regulation, recreation, eco-tourism, research, livestock	burning, resource extraction, pollution	2007-09-08	Some red burning, illegal fhishing and peachers, illegal garbage disposal	365.1	19.0301
2016-06-05	2878.27	11	4	5	3	3	0	3	5	2865.45	575.654	6	0.333333	24.185	0	73.6	19.7879	vransko	29.4751	10.1882	3.58895	0.628821	0.181905	0.0244839	0	50.9659	4.9466	0	0.393025	0.00645738	5764.72	27936	4.84603	3	0	POLYGON ((15.540344970743831 43.952883856404924, 15.540434680815906 43.95275570031538, 15.541101091941869 43.952396863624415, 15.542267312086835 43.952255892195694, 15.542908092534503 43.952089289189416, 15.543728291327625 43.95203802693345, 15.5442665463641 43.95182016167115, 15.544651014632677 43.95148695565854, 15.545663448009748 43.949295486797325, 15.546483646802926 43.947655089211025, 15.54…	Vransko Lake	Croatia	7	5748	biodiversity, flood control, water quality regulation, recreation, eco-tourism, research, livestock	burning, resource extraction, pollution	2007-09-08	Some red burning, illegal fhishing and peachers, illegal garbage disposal	206	19.4741
2016-06-10	2894.45	16	8	0	1	0	13	2	16	2848.38	180.903	0	0	0	0	0	19.8993	vransko	29.4751	10.1882	3.58895	0.628821	0.181905	0.0244839	0	50.9659	4.9466	0	0.393025	0.00645738	5764.72	27936	4.84603	3	0	POLYGON ((15.540344970743831 43.952883856404924, 15.540434680815906 43.95275570031538, 15.541101091941869 43.952396863624415, 15.542267312086835 43.952255892195694, 15.542908092534503 43.952089289189416, 15.543728291327625 43.95203802693345, 15.5442665463641 43.95182016167115, 15.544651014632677 43.95148695565854, 15.545663448009748 43.949295486797325, 15.546483646802926 43.947655089211025, 15.54…	Vransko Lake	Croatia	7	5748	biodiversity, flood control, water quality regulation, recreation, eco-tourism, research, livestock	burning, resource extraction, pollution	2007-09-08	Some red burning, illegal fhishing and peachers, illegal garbage disposal	194.3	20.6884
2016-06-29	2848.7	5	0	2	0	1	0	3	5	2838.36	569.741	0	0	0	0	0	24.0071	vransko	29.4751	10.1882	3.58895	0.628821	0.181905	0.0244839	0	50.9659	4.9466	0	0.393025	0.00645738	5764.72	27936	4.84603	3	0	POLYGON ((15.540344970743831 43.952883856404924, 15.540434680815906 43.95275570031538, 15.541101091941869 43.952396863624415, 15.542267312086835 43.952255892195694, 15.542908092534503 43.952089289189416, 15.543728291327625 43.95203802693345, 15.5442665463641 43.95182016167115, 15.544651014632677 43.95148695565854, 15.545663448009748 43.949295486797325, 15.546483646802926 43.947655089211025, 15.54…	Vransko Lake	Croatia	7	5748	biodiversity, flood control, water quality regulation, recreation, eco-tourism, research, livestock	burning, resource extraction, pollution	2007-09-08	Some red burning, illegal fhishing and peachers, illegal garbage disposal	146.4	25.3872
2016-07-04	2603.95	19	2	2	1	1	13	3	17	2553.68	153.174	2	0.00653595	2.13486	0	0	25.2921	vransko	29.4751	10.1882	3.58895	0.628821	0.181905	0.0244839	0	50.9659	4.9466	0	0.393025	0.00645738	5764.72	27936	4.84603	3	0	POLYGON ((15.540344970743831 43.952883856404924, 15.540434680815906 43.95275570031538, 15.541101091941869 43.952396863624415, 15.542267312086835 43.952255892195694, 15.542908092534503 43.952089289189416, 15.543728291327625 43.95203802693345, 15.5442665463641 43.95182016167115, 15.544651014632677 43.95148695565854, 15.545663448009748 43.949295486797325, 15.546483646802926 43.947655089211025, 15.54…	Vransko Lake	Croatia	7	5748	biodiversity, flood control, water quality regulation, recreation, eco-tourism, research, livestock	burning, resource extraction, pollution	2007-09-08	Some red burning, illegal fhishing and peachers, illegal garbage disposal	155.5	24.9093
2016-07-11	2847	6	3	1	1	1	0	4	6	2833.93	474.501	0	0	0	0	0	27.99	vransko	29.4751	10.1882	3.58895	0.628821	0.181905	0.0244839	0	50.9659	4.9466	0	0.393025	0.00645738	5764.72	27936	4.84603	3	0	POLYGON ((15.540344970743831 43.952883856404924, 15.540434680815906 43.95275570031538, 15.541101091941869 43.952396863624415, 15.542267312086835 43.952255892195694, 15.542908092534503 43.952089289189416, 15.543728291327625 43.95203802693345, 15.5442665463641 43.95182016167115, 15.544651014632677 43.95148695565854, 15.545663448009748 43.949295486797325, 15.546483646802926 43.947655089211025, 15.54…	Vransko Lake	Croatia	7	5748	biodiversity, flood control, water quality regulation, recreation, eco-tourism, research, livestock	burning, resource extraction, pollution	2007-09-08	Some red burning, illegal fhishing and peachers, illegal garbage disposal	0	26.4084
2016-07-16	2668.34	15	0	0	0	0	10	5	15	2627.42	177.89	0	0	0	0	326.7	19.0629	vransko	29.4751	10.1882	3.58895	0.628821	0.181905	0.0244839	0	50.9659	4.9466	0	0.393025	0.00645738	5764.72	27936	4.84603	3	0	POLYGON ((15.540344970743831 43.952883856404924, 15.540434680815906 43.95275570031538, 15.541101091941869 43.952396863624415, 15.542267312086835 43.952255892195694, 15.542908092534503 43.952089289189416, 15.543728291327625 43.95203802693345, 15.5442665463641 43.95182016167115, 15.544651014632677 43.95148695565854, 15.545663448009748 43.949295486797325, 15.546483646802926 43.947655089211025, 15.54…	Vransko Lake	Croatia	7	5748	biodiversity, flood control, water quality regulation, recreation, eco-tourism, research, livestock	burning, resource extraction, pollution	2007-09-08	Some red burning, illegal fhishing and peachers, illegal garbage disposal	917.5	24.4989
2016-07-23	2847.43	6	0	3	0	1	0	3	5	2835.3	569.486	1	0	3.29155	0	0	26.395	vransko	29.4751	10.1882	3.58895	0.628821	0.181905	0.0244839	0	50.9659	4.9466	0	0.393025	0.00645738	5764.72	27936	4.84603	3	0	POLYGON ((15.540344970743831 43.952883856404924, 15.540434680815906 43.95275570031538, 15.541101091941869 43.952396863624415, 15.542267312086835 43.952255892195694, 15.542908092534503 43.952089289189416, 15.543728291327625 43.95203802693345, 15.5442665463641 43.95182016167115, 15.544651014632677 43.95148695565854, 15.545663448009748 43.949295486797325, 15.546483646802926 43.947655089211025, 15.54…	Vransko Lake	Croatia	7	5748	biodiversity, flood control, water quality regulation, recreation, eco-tourism, research, livestock	burning, resource extraction, pollution	2007-09-08	Some red burning, illegal fhishing and peachers, illegal garbage disposal	24.3	25.1193
2016-07-28	2888.01	17	2	0	1	0	13	3	16	2837.28	180.5	1	0	1.02906	0	0	25.3664	vransko	29.4751	10.1882	3.58895	0.628821	0.181905	0.0244839	0	50.9659	4.9466	0	0.393025	0.00645738	5764.72	27936	4.84603	3	0	POLYGON ((15.540344970743831 43.952883856404924, 15.540434680815906 43.95275570031538, 15.541101091941869 43.952396863624415, 15.542267312086835 43.952255892195694, 15.542908092534503 43.952089289189416, 15.543728291327625 43.95203802693345, 15.5442665463641 43.95182016167115, 15.544651014632677 43.95148695565854, 15.545663448009748 43.949295486797325, 15.546483646802926 43.947655089211025, 15.54…	Vransko Lake	Croatia	7	5748	biodiversity, flood control, water quality regulation, recreation, eco-tourism, research, livestock	burning, resource extraction, pollution	2007-09-08	Some red burning, illegal fhishing and peachers, illegal garbage disposal	48.5	26.0929
2016-08-04	2841.36	5	0	0	0	0	2	3	5	2828.86	568.271	0	0	0	0	0	25.6786	vransko	29.4751	10.1882	3.58895	0.628821	0.181905	0.0244839	0	50.9659	4.9466	0	0.393025	0.00645738	5764.72	27936	4.84603	3	0	POLYGON ((15.540344970743831 43.952883856404924, 15.540434680815906 43.95275570031538, 15.541101091941869 43.952396863624415, 15.542267312086835 43.952255892195694, 15.542908092534503 43.952089289189416, 15.543728291327625 43.95203802693345, 15.5442665463641 43.95182016167115, 15.544651014632677 43.95148695565854, 15.545663448009748 43.949295486797325, 15.546483646802926 43.947655089211025, 15.54…	Vransko Lake	Croatia	7	5748	biodiversity, flood control, water quality regulation, recreation, eco-tourism, research, livestock	burning, resource extraction, pollution	2007-09-08	Some red burning, illegal fhishing and peachers, illegal garbage disposal	226	25.7062
2016-08-09	2840.91	14	0	0	0	0	11	3	14	2802.51	202.922	0	0	0	0	0	24.7486	vransko	29.4751	10.1882	3.58895	0.628821	0.181905	0.0244839	0	50.9659	4.9466	0	0.393025	0.00645738	5764.72	27936	4.84603	3	0	POLYGON ((15.540344970743831 43.952883856404924, 15.540434680815906 43.95275570031538, 15.541101091941869 43.952396863624415, 15.542267312086835 43.952255892195694, 15.542908092534503 43.952089289189416, 15.543728291327625 43.95203802693345, 15.5442665463641 43.95182016167115, 15.544651014632677 43.95148695565854, 15.545663448009748 43.949295486797325, 15.546483646802926 43.947655089211025, 15.54…	Vransko Lake	Croatia	7	5748	biodiversity, flood control, water quality regulation, recreation, eco-tourism, research, livestock	burning, resource extraction, pollution	2007-09-08	Some red burning, illegal fhishing and peachers, illegal garbage disposal	222.5	24.7696
2016-08-16	2836.39	5	0	2	0	1	0	3	4	2827.36	709.097	1	0	5.48087	0	0	24.2571	vransko	29.4751	10.1882	3.58895	0.628821	0.181905	0.0244839	0	50.9659	4.9466	0	0.393025	0.00645738	5764.72	27936	4.84603	3	0	POLYGON ((15.540344970743831 43.952883856404924, 15.540434680815906 43.95275570031538, 15.541101091941869 43.952396863624415, 15.542267312086835 43.952255892195694, 15.542908092534503 43.952089289189416, 15.543728291327625 43.95203802693345, 15.5442665463641 43.95182016167115, 15.544651014632677 43.95148695565854, 15.545663448009748 43.949295486797325, 15.546483646802926 43.947655089211025, 15.54…	Vransko Lake	Croatia	7	5748	biodiversity, flood control, water quality regulation, recreation, eco-tourism, research, livestock	burning, resource extraction, pollution	2007-09-08	Some red burning, illegal fhishing and peachers, illegal garbage disposal	208.3	21.8938
2016-08-21	2860.24	11	2	0	1	0	7	3	11	2828.4	260.022	0	0	0	0	0	25.1493	vransko	29.4751	10.1882	3.58895	0.628821	0.181905	0.0244839	0	50.9659	4.9466	0	0.393025	0.00645738	5764.72	27936	4.84603	3	0	POLYGON ((15.540344970743831 43.952883856404924, 15.540434680815906 43.95275570031538, 15.541101091941869 43.952396863624415, 15.542267312086835 43.952255892195694, 15.542908092534503 43.952089289189416, 15.543728291327625 43.95203802693345, 15.5442665463641 43.95182016167115, 15.544651014632677 43.95148695565854, 15.545663448009748 43.949295486797325, 15.546483646802926 43.947655089211025, 15.54…	Vransko Lake	Croatia	7	5748	biodiversity, flood control, water quality regulation, recreation, eco-tourism, research, livestock	burning, resource extraction, pollution	2007-09-08	Some red burning, illegal fhishing and peachers, illegal garbage disposal	36.6	23.8706
2016-09-02	2832.58	15	0	0	0	0	6	9	15	2791.54	188.839	0	0	0	0	0	24.2893	vransko	29.4751	10.1882	3.58895	0.628821	0.181905	0.0244839	0	50.9659	4.9466	0	0.393025	0.00645738	5764.72	27936	4.84603	3	0	POLYGON ((15.540344970743831 43.952883856404924, 15.540434680815906 43.95275570031538, 15.541101091941869 43.952396863624415, 15.542267312086835 43.952255892195694, 15.542908092534503 43.952089289189416, 15.543728291327625 43.95203802693345, 15.5442665463641 43.95182016167115, 15.544651014632677 43.95148695565854, 15.545663448009748 43.949295486797325, 15.546483646802926 43.947655089211025, 15.54…	Vransko Lake	Croatia	7	5748	biodiversity, flood control, water quality regulation, recreation, eco-tourism, research, livestock	burning, resource extraction, pollution	2007-09-08	Some red burning, illegal fhishing and peachers, illegal garbage disposal	0	24.257
2016-09-09	2833.03	3	2	0	1	0	0	2	3	2827.21	944.344	0	0	0	0	0	23.9793	vransko	29.4751	10.1882	3.58895	0.628821	0.181905	0.0244839	0	50.9659	4.9466	0	0.393025	0.00645738	5764.72	27936	4.84603	3	0	POLYGON ((15.540344970743831 43.952883856404924, 15.540434680815906 43.95275570031538, 15.541101091941869 43.952396863624415, 15.542267312086835 43.952255892195694, 15.542908092534503 43.952089289189416, 15.543728291327625 43.95203802693345, 15.5442665463641 43.95182016167115, 15.544651014632677 43.95148695565854, 15.545663448009748 43.949295486797325, 15.546483646802926 43.947655089211025, 15.54…	Vransko Lake	Croatia	7	5748	biodiversity, flood control, water quality regulation, recreation, eco-tourism, research, livestock	burning, resource extraction, pollution	2007-09-08	Some red burning, illegal fhishing and peachers, illegal garbage disposal	180.2	22.1744
2016-09-14	2863.49	14	0	0	0	0	11	3	13	2826.33	220.268	1	0	1.68638	0	0	21.5571	vransko	29.4751	10.1882	3.58895	0.628821	0.181905	0.0244839	0	50.9659	4.9466	0	0.393025	0.00645738	5764.72	27936	4.84603	3	0	POLYGON ((15.540344970743831 43.952883856404924, 15.540434680815906 43.95275570031538, 15.541101091941869 43.952396863624415, 15.542267312086835 43.952255892195694, 15.542908092534503 43.952089289189416, 15.543728291327625 43.95203802693345, 15.5442665463641 43.95182016167115, 15.544651014632677 43.95148695565854, 15.545663448009748 43.949295486797325, 15.546483646802926 43.947655089211025, 15.54…	Vransko Lake	Croatia	7	5748	biodiversity, flood control, water quality regulation, recreation, eco-tourism, research, livestock	burning, resource extraction, pollution	2007-09-08	Some red burning, illegal fhishing and peachers, illegal garbage disposal	16.5	22.5638
2016-09-21	2807.29	4	0	0	0	0	1	3	4	2798.18	701.822	0	0	0	0	0	16.9071	vransko	29.4751	10.1882	3.58895	0.628821	0.181905	0.0244839	0	50.9659	4.9466	0	0.393025	0.00645738	5764.72	27936	4.84603	3	0	POLYGON ((15.540344970743831 43.952883856404924, 15.540434680815906 43.95275570031538, 15.541101091941869 43.952396863624415, 15.542267312086835 43.952255892195694, 15.542908092534503 43.952089289189416, 15.543728291327625 43.95203802693345, 15.5442665463641 43.95182016167115, 15.544651014632677 43.95148695565854, 15.545663448009748 43.949295486797325, 15.546483646802926 43.947655089211025, 15.54…	Vransko Lake	Croatia	7	5748	biodiversity, flood control, water quality regulation, recreation, eco-tourism, research, livestock	burning, resource extraction, pollution	2007-09-08	Some red burning, illegal fhishing and peachers, illegal garbage disposal	347.4	19.7976
2016-09-26	2812.53	17	0	0	0	0	13	4	16	2771.26	175.783	1	0	1.02832	0	0	18.035	vransko	29.4751	10.1882	3.58895	0.628821	0.181905	0.0244839	0	50.9659	4.9466	0	0.393025	0.00645738	5764.72	27936	4.84603	3	0	POLYGON ((15.540344970743831 43.952883856404924, 15.540434680815906 43.95275570031538, 15.541101091941869 43.952396863624415, 15.542267312086835 43.952255892195694, 15.542908092534503 43.952089289189416, 15.543728291327625 43.95203802693345, 15.5442665463641 43.95182016167115, 15.544651014632677 43.95148695565854, 15.545663448009748 43.949295486797325, 15.546483646802926 43.947655089211025, 15.54…	Vransko Lake	Croatia	7	5748	biodiversity, flood control, water quality regulation, recreation, eco-tourism, research, livestock	burning, resource extraction, pollution	2007-09-08	Some red burning, illegal fhishing and peachers, illegal garbage disposal	98.4	17.7088
2016-10-03	2846.1	3	0	0	0	0	0	3	3	2837.72	948.7	0	0	0	0	61.2	15.9414	vransko	29.4751	10.1882	3.58895	0.628821	0.181905	0.0244839	0	50.9659	4.9466	0	0.393025	0.00645738	5764.72	27936	4.84603	3	0	POLYGON ((15.540344970743831 43.952883856404924, 15.540434680815906 43.95275570031538, 15.541101091941869 43.952396863624415, 15.542267312086835 43.952255892195694, 15.542908092534503 43.952089289189416, 15.543728291327625 43.95203802693345, 15.5442665463641 43.95182016167115, 15.544651014632677 43.95148695565854, 15.545663448009748 43.949295486797325, 15.546483646802926 43.947655089211025, 15.54…	Vransko Lake	Croatia	7	5748	biodiversity, flood control, water quality regulation, recreation, eco-tourism, research, livestock	burning, resource extraction, pollution	2007-09-08	Some red burning, illegal fhishing and peachers, illegal garbage disposal	61.2	17.3677
2016-10-08	2604.04	15	0	3	0	1	10	2	13	2567.64	200.311	2	0.010989	2.74417	0	56.6	13.8121	vransko	29.4751	10.1882	3.58895	0.628821	0.181905	0.0244839	0	50.9659	4.9466	0	0.393025	0.00645738	5764.72	27936	4.84603	3	0	POLYGON ((15.540344970743831 43.952883856404924, 15.540434680815906 43.95275570031538, 15.541101091941869 43.952396863624415, 15.542267312086835 43.952255892195694, 15.542908092534503 43.952089289189416, 15.543728291327625 43.95203802693345, 15.5442665463641 43.95182016167115, 15.544651014632677 43.95148695565854, 15.545663448009748 43.949295486797325, 15.546483646802926 43.947655089211025, 15.54…	Vransko Lake	Croatia	7	5748	biodiversity, flood control, water quality regulation, recreation, eco-tourism, research, livestock	burning, resource extraction, pollution	2007-09-08	Some red burning, illegal fhishing and peachers, illegal garbage disposal	740.1	14.426
2016-10-15	2835.21	3	3	0	1	0	0	2	3	2827.76	945.071	0	0	0	0	0	17.9236	vransko	29.4751	10.1882	3.58895	0.628821	0.181905	0.0244839	0	50.9659	4.9466	0	0.393025	0.00645738	5764.72	27936	4.84603	3	0	POLYGON ((15.540344970743831 43.952883856404924, 15.540434680815906 43.95275570031538, 15.541101091941869 43.952396863624415, 15.542267312086835 43.952255892195694, 15.542908092534503 43.952089289189416, 15.543728291327625 43.95203802693345, 15.5442665463641 43.95182016167115, 15.544651014632677 43.95148695565854, 15.545663448009748 43.949295486797325, 15.546483646802926 43.947655089211025, 15.54…	Vransko Lake	Croatia	7	5748	biodiversity, flood control, water quality regulation, recreation, eco-tourism, research, livestock	burning, resource extraction, pollution	2007-09-08	Some red burning, illegal fhishing and peachers, illegal garbage disposal	362.1	13.7979
2016-10-20	2885.62	12	0	0	0	0	9	3	12	2852.88	240.468	0	0	0	0	0	16.045	vransko	29.4751	10.1882	3.58895	0.628821	0.181905	0.0244839	0	50.9659	4.9466	0	0.393025	0.00645738	5764.72	27936	4.84603	3	0	POLYGON ((15.540344970743831 43.952883856404924, 15.540434680815906 43.95275570031538, 15.541101091941869 43.952396863624415, 15.542267312086835 43.952255892195694, 15.542908092534503 43.952089289189416, 15.543728291327625 43.95203802693345, 15.5442665463641 43.95182016167115, 15.544651014632677 43.95148695565854, 15.545663448009748 43.949295486797325, 15.546483646802926 43.947655089211025, 15.54…	Vransko Lake	Croatia	7	5748	biodiversity, flood control, water quality regulation, recreation, eco-tourism, research, livestock	burning, resource extraction, pollution	2007-09-08	Some red burning, illegal fhishing and peachers, illegal garbage disposal	31.4	16.4222
2016-10-27	2749.93	5	2	1	1	1	1	2	5	2738.97	549.987	0	0	0	0	0	14.6086	vransko	29.4751	10.1882	3.58895	0.628821	0.181905	0.0244839	0	50.9659	4.9466	0	0.393025	0.00645738	5764.72	27936	4.84603	3	0	POLYGON ((15.540344970743831 43.952883856404924, 15.540434680815906 43.95275570031538, 15.541101091941869 43.952396863624415, 15.542267312086835 43.952255892195694, 15.542908092534503 43.952089289189416, 15.543728291327625 43.95203802693345, 15.5442665463641 43.95182016167115, 15.544651014632677 43.95148695565854, 15.545663448009748 43.949295486797325, 15.546483646802926 43.947655089211025, 15.54…	Vransko Lake	Croatia	7	5748	biodiversity, flood control, water quality regulation, recreation, eco-tourism, research, livestock	burning, resource extraction, pollution	2007-09-08	Some red burning, illegal fhishing and peachers, illegal garbage disposal	527	15.2961
2016-11-01	2855.14	10	0	0	0	0	6	4	10	2822.34	285.514	0	0	0	0	0	11.815	vransko	29.4751	10.1882	3.58895	0.628821	0.181905	0.0244839	0	50.9659	4.9466	0	0.393025	0.00645738	5764.72	27936	4.84603	3	0	POLYGON ((15.540344970743831 43.952883856404924, 15.540434680815906 43.95275570031538, 15.541101091941869 43.952396863624415, 15.542267312086835 43.952255892195694, 15.542908092534503 43.952089289189416, 15.543728291327625 43.95203802693345, 15.5442665463641 43.95182016167115, 15.544651014632677 43.95148695565854, 15.545663448009748 43.949295486797325, 15.546483646802926 43.947655089211025, 15.54…	Vransko Lake	Croatia	7	5748	biodiversity, flood control, water quality regulation, recreation, eco-tourism, research, livestock	burning, resource extraction, pollution	2007-09-08	Some red burning, illegal fhishing and peachers, illegal garbage disposal	26.7	14.0047
2016-11-08	2818.93	6	0	2	0	1	0	4	6	2804.37	469.822	0	0	0	0	108.7	10.29	vransko	29.4751	10.1882	3.58895	0.628821	0.181905	0.0244839	0	50.9659	4.9466	0	0.393025	0.00645738	5764.72	27936	4.84603	3	0	POLYGON ((15.540344970743831 43.952883856404924, 15.540434680815906 43.95275570031538, 15.541101091941869 43.952396863624415, 15.542267312086835 43.952255892195694, 15.542908092534503 43.952089289189416, 15.543728291327625 43.95203802693345, 15.5442665463641 43.95182016167115, 15.544651014632677 43.95148695565854, 15.545663448009748 43.949295486797325, 15.546483646802926 43.947655089211025, 15.54…	Vransko Lake	Croatia	7	5748	biodiversity, flood control, water quality regulation, recreation, eco-tourism, research, livestock	burning, resource extraction, pollution	2007-09-08	Some red burning, illegal fhishing and peachers, illegal garbage disposal	275.8	13.6336
2016-11-13	2808.79	6	4	0	1	0	3	2	6	2788.72	468.132	0	0	0	0	0	7.64714	vransko	29.4751	10.1882	3.58895	0.628821	0.181905	0.0244839	0	50.9659	4.9466	0	0.393025	0.00645738	5764.72	27936	4.84603	3	0	POLYGON ((15.540344970743831 43.952883856404924, 15.540434680815906 43.95275570031538, 15.541101091941869 43.952396863624415, 15.542267312086835 43.952255892195694, 15.542908092534503 43.952089289189416, 15.543728291327625 43.95203802693345, 15.5442665463641 43.95182016167115, 15.544651014632677 43.95148695565854, 15.545663448009748 43.949295486797325, 15.546483646802926 43.947655089211025, 15.54…	Vransko Lake	Croatia	7	5748	biodiversity, flood control, water quality regulation, recreation, eco-tourism, research, livestock	burning, resource extraction, pollution	2007-09-08	Some red burning, illegal fhishing and peachers, illegal garbage disposal	154.8	9.76694
2016-11-20	2866.38	6	0	4	0	1	0	2	6	2850.63	477.73	0	0	0	0	105	15.8479	vransko	29.4751	10.1882	3.58895	0.628821	0.181905	0.0244839	0	50.9659	4.9466	0	0.393025	0.00645738	5764.72	27936	4.84603	3	0	POLYGON ((15.540344970743831 43.952883856404924, 15.540434680815906 43.95275570031538, 15.541101091941869 43.952396863624415, 15.542267312086835 43.952255892195694, 15.542908092534503 43.952089289189416, 15.543728291327625 43.95203802693345, 15.5442665463641 43.95182016167115, 15.544651014632677 43.95148695565854, 15.545663448009748 43.949295486797325, 15.546483646802926 43.947655089211025, 15.54…	Vransko Lake	Croatia	7	5748	biodiversity, flood control, water quality regulation, recreation, eco-tourism, research, livestock	burning, resource extraction, pollution	2007-09-08	Some red burning, illegal fhishing and peachers, illegal garbage disposal	212.4	10.7264
2016-12-02	2889.34	11	2	5	1	2	3	2	8	2852.4	361.168	3	0.0222222	6.5842	0.420055	0	9.17714	vransko	29.4751	10.1882	3.58895	0.628821	0.181905	0.0244839	0	50.9659	4.9466	0	0.393025	0.00645738	5764.72	27936	4.84603	3	0	POLYGON ((15.540344970743831 43.952883856404924, 15.540434680815906 43.95275570031538, 15.541101091941869 43.952396863624415, 15.542267312086835 43.952255892195694, 15.542908092534503 43.952089289189416, 15.543728291327625 43.95203802693345, 15.5442665463641 43.95182016167115, 15.544651014632677 43.95148695565854, 15.545663448009748 43.949295486797325, 15.546483646802926 43.947655089211025, 15.54…	Vransko Lake	Croatia	7	5748	biodiversity, flood control, water quality regulation, recreation, eco-tourism, research, livestock	burning, resource extraction, pollution	2007-09-08	Some red burning, illegal fhishing and peachers, illegal garbage disposal	108.5	8.16112
2016-12-07	2642.58	10	9	0	2	1	6	2	10	2550.54	264.258	0	0	0	0	0	7.55	vransko	29.4751	10.1882	3.58895	0.628821	0.181905	0.0244839	0	50.9659	4.9466	0	0.393025	0.00645738	5764.72	27936	4.84603	3	0	POLYGON ((15.540344970743831 43.952883856404924, 15.540434680815906 43.95275570031538, 15.541101091941869 43.952396863624415, 15.542267312086835 43.952255892195694, 15.542908092534503 43.952089289189416, 15.543728291327625 43.95203802693345, 15.5442665463641 43.95182016167115, 15.544651014632677 43.95148695565854, 15.545663448009748 43.949295486797325, 15.546483646802926 43.947655089211025, 15.54…	Vransko Lake	Croatia	7	5748	biodiversity, flood control, water quality regulation, recreation, eco-tourism, research, livestock	burning, resource extraction, pollution	2007-09-08	Some red burning, illegal fhishing and peachers, illegal garbage disposal	0	8.88653
2016-12-14	2900.63	10	0	8	0	2	0	2	8	2852.02	362.579	2	0	3.65676	0.5	0	7.40643	vransko	29.4751	10.1882	3.58895	0.628821	0.181905	0.0244839	0	50.9659	4.9466	0	0.393025	0.00645738	5764.72	27936	4.84603	3	0	POLYGON ((15.540344970743831 43.952883856404924, 15.540434680815906 43.95275570031538, 15.541101091941869 43.952396863624415, 15.542267312086835 43.952255892195694, 15.542908092534503 43.952089289189416, 15.543728291327625 43.95203802693345, 15.5442665463641 43.95182016167115, 15.544651014632677 43.95148695565854, 15.545663448009748 43.949295486797325, 15.546483646802926 43.947655089211025, 15.54…	Vransko Lake	Croatia	7	5748	biodiversity, flood control, water quality regulation, recreation, eco-tourism, research, livestock	burning, resource extraction, pollution	2007-09-08	Some red burning, illegal fhishing and peachers, illegal garbage disposal	0	7.45622
2016-12-19	2854.4	9	8	0	2	1	5	2	9	2774.41	317.156	0	0	0	0	0	7.15	vransko	29.4751	10.1882	3.58895	0.628821	0.181905	0.0244839	0	50.9659	4.9466	0	0.393025	0.00645738	5764.72	27936	4.84603	3	0	POLYGON ((15.540344970743831 43.952883856404924, 15.540434680815906 43.95275570031538, 15.541101091941869 43.952396863624415, 15.542267312086835 43.952255892195694, 15.542908092534503 43.952089289189416, 15.543728291327625 43.95203802693345, 15.5442665463641 43.95182016167115, 15.544651014632677 43.95148695565854, 15.545663448009748 43.949295486797325, 15.546483646802926 43.947655089211025, 15.54…	Vransko Lake	Croatia	7	5748	biodiversity, flood control, water quality regulation, recreation, eco-tourism, research, livestock	burning, resource extraction, pollution	2007-09-08	Some red burning, illegal fhishing and peachers, illegal garbage disposal	0	6.52143
2016-12-26	2841.84	6	0	4	0	2	0	2	6	2828.46	473.64	0	0	0	0	0	9.15071	vransko	29.4751	10.1882	3.58895	0.628821	0.181905	0.0244839	0	50.9659	4.9466	0	0.393025	0.00645738	5764.72	27936	4.84603	3	0	POLYGON ((15.540344970743831 43.952883856404924, 15.540434680815906 43.95275570031538, 15.541101091941869 43.952396863624415, 15.542267312086835 43.952255892195694, 15.542908092534503 43.952089289189416, 15.543728291327625 43.95203802693345, 15.5442665463641 43.95182016167115, 15.544651014632677 43.95148695565854, 15.545663448009748 43.949295486797325, 15.546483646802926 43.947655089211025, 15.54…	Vransko Lake	Croatia	7	5748	biodiversity, flood control, water quality regulation, recreation, eco-tourism, research, livestock	burning, resource extraction, pollution	2007-09-08	Some red burning, illegal fhishing and peachers, illegal garbage disposal	0	7.54388
2017-05-19	2866.91	8	2	5	1	1	0	2	5	2854.78	573.383	3	0.142857	11.8694	0	0	19.8443	vransko	29.4751	10.1882	3.58895	0.628821	0.181905	0.0244839	0	50.9659	4.9466	0	0.393025	0.00645738	5764.72	27936	4.84603	3	0	POLYGON ((15.540344970743831 43.952883856404924, 15.540434680815906 43.95275570031538, 15.541101091941869 43.952396863624415, 15.542267312086835 43.952255892195694, 15.542908092534503 43.952089289189416, 15.543728291327625 43.95203802693345, 15.5442665463641 43.95182016167115, 15.544651014632677 43.95148695565854, 15.545663448009748 43.949295486797325, 15.546483646802926 43.947655089211025, 15.54…	Vransko Lake	Croatia	7	5748	biodiversity, flood control, water quality regulation, recreation, eco-tourism, research, livestock	burning, resource extraction, pollution	2007-09-08	Some red burning, illegal fhishing and peachers, illegal garbage disposal	163.2	19.9335
2017-05-24	2866.91	16	6	0	4	4	10	2	12	2829.02	238.909	4	0.0571429	9.60436	0	130.8	19.8357	vransko	29.4751	10.1882	3.58895	0.628821	0.181905	0.0244839	0	50.9659	4.9466	0	0.393025	0.00645738	5764.72	27936	4.84603	3	0	POLYGON ((15.540344970743831 43.952883856404924, 15.540434680815906 43.95275570031538, 15.541101091941869 43.952396863624415, 15.542267312086835 43.952255892195694, 15.542908092534503 43.952089289189416, 15.543728291327625 43.95203802693345, 15.5442665463641 43.95182016167115, 15.544651014632677 43.95148695565854, 15.545663448009748 43.949295486797325, 15.546483646802926 43.947655089211025, 15.54…	Vransko Lake	Croatia	7	5748	biodiversity, flood control, water quality regulation, recreation, eco-tourism, research, livestock	burning, resource extraction, pollution	2007-09-08	Some red burning, illegal fhishing and peachers, illegal garbage disposal	238.9	19.2951
2017-05-31	2840.87	6	5	0	2	2	0	4	6	2829.56	473.478	0	0	0	0	10	22.0364	vransko	29.4751	10.1882	3.58895	0.628821	0.181905	0.0244839	0	50.9659	4.9466	0	0.393025	0.00645738	5764.72	27936	4.84603	3	0	POLYGON ((15.540344970743831 43.952883856404924, 15.540434680815906 43.95275570031538, 15.541101091941869 43.952396863624415, 15.542267312086835 43.952255892195694, 15.542908092534503 43.952089289189416, 15.543728291327625 43.95203802693345, 15.5442665463641 43.95182016167115, 15.544651014632677 43.95148695565854, 15.545663448009748 43.949295486797325, 15.546483646802926 43.947655089211025, 15.54…	Vransko Lake	Croatia	7	5748	biodiversity, flood control, water quality regulation, recreation, eco-tourism, research, livestock	burning, resource extraction, pollution	2007-09-08	Some red burning, illegal fhishing and peachers, illegal garbage disposal	86.8	20.4593
2017-06-05	2842.75	18	4	2	2	1	12	2	16	2790.17	177.672	2	0	2.57922	0.5	0	23.4221	vransko	29.4751	10.1882	3.58895	0.628821	0.181905	0.0244839	0	50.9659	4.9466	0	0.393025	0.00645738	5764.72	27936	4.84603	3	0	POLYGON ((15.540344970743831 43.952883856404924, 15.540434680815906 43.95275570031538, 15.541101091941869 43.952396863624415, 15.542267312086835 43.952255892195694, 15.542908092534503 43.952089289189416, 15.543728291327625 43.95203802693345, 15.5442665463641 43.95182016167115, 15.544651014632677 43.95148695565854, 15.545663448009748 43.949295486797325, 15.546483646802926 43.947655089211025, 15.54…	Vransko Lake	Croatia	7	5748	biodiversity, flood control, water quality regulation, recreation, eco-tourism, research, livestock	burning, resource extraction, pollution	2007-09-08	Some red burning, illegal fhishing and peachers, illegal garbage disposal	10	22.5013
2017-06-12	2857.67	8	5	0	4	2	0	4	8	2840.33	357.209	0	0	0	0	0	23.0564	vransko	29.4751	10.1882	3.58895	0.628821	0.181905	0.0244839	0	50.9659	4.9466	0	0.393025	0.00645738	5764.72	27936	4.84603	3	0	POLYGON ((15.540344970743831 43.952883856404924, 15.540434680815906 43.95275570031538, 15.541101091941869 43.952396863624415, 15.542267312086835 43.952255892195694, 15.542908092534503 43.952089289189416, 15.543728291327625 43.95203802693345, 15.5442665463641 43.95182016167115, 15.544651014632677 43.95148695565854, 15.545663448009748 43.949295486797325, 15.546483646802926 43.947655089211025, 15.54…	Vransko Lake	Croatia	7	5748	biodiversity, flood control, water quality regulation, recreation, eco-tourism, research, livestock	burning, resource extraction, pollution	2007-09-08	Some red burning, illegal fhishing and peachers, illegal garbage disposal	0	22.348
2017-06-17	2560.92	19	2	0	1	0	13	5	19	2496.42	134.785	0	0	0	0	56.9	23.8779	vransko	29.4751	10.1882	3.58895	0.628821	0.181905	0.0244839	0	50.9659	4.9466	0	0.393025	0.00645738	5764.72	27936	4.84603	3	0	POLYGON ((15.540344970743831 43.952883856404924, 15.540434680815906 43.95275570031538, 15.541101091941869 43.952396863624415, 15.542267312086835 43.952255892195694, 15.542908092534503 43.952089289189416, 15.543728291327625 43.95203802693345, 15.5442665463641 43.95182016167115, 15.544651014632677 43.95148695565854, 15.545663448009748 43.949295486797325, 15.546483646802926 43.947655089211025, 15.54…	Vransko Lake	Croatia	7	5748	biodiversity, flood control, water quality regulation, recreation, eco-tourism, research, livestock	burning, resource extraction, pollution	2007-09-08	Some red burning, illegal fhishing and peachers, illegal garbage disposal	56.9	23.7695
2017-06-24	2860.78	9	0	3	0	1	0	6	7	2842.86	408.683	2	0.0357143	5.49082	0	0	27.2693	vransko	29.4751	10.1882	3.58895	0.628821	0.181905	0.0244839	0	50.9659	4.9466	0	0.393025	0.00645738	5764.72	27936	4.84603	3	0	POLYGON ((15.540344970743831 43.952883856404924, 15.540434680815906 43.95275570031538, 15.541101091941869 43.952396863624415, 15.542267312086835 43.952255892195694, 15.542908092534503 43.952089289189416, 15.543728291327625 43.95203802693345, 15.5442665463641 43.95182016167115, 15.544651014632677 43.95148695565854, 15.545663448009748 43.949295486797325, 15.546483646802926 43.947655089211025, 15.54…	Vransko Lake	Croatia	7	5748	biodiversity, flood control, water quality regulation, recreation, eco-tourism, research, livestock	burning, resource extraction, pollution	2007-09-08	Some red burning, illegal fhishing and peachers, illegal garbage disposal	132	25.3117
2017-06-29	2851.42	18	3	0	1	0	11	6	18	2795.28	158.412	0	0	0	0	0	25.6886	vransko	29.4751	10.1882	3.58895	0.628821	0.181905	0.0244839	0	50.9659	4.9466	0	0.393025	0.00645738	5764.72	27936	4.84603	3	0	POLYGON ((15.540344970743831 43.952883856404924, 15.540434680815906 43.95275570031538, 15.541101091941869 43.952396863624415, 15.542267312086835 43.952255892195694, 15.542908092534503 43.952089289189416, 15.543728291327625 43.95203802693345, 15.5442665463641 43.95182016167115, 15.544651014632677 43.95148695565854, 15.545663448009748 43.949295486797325, 15.546483646802926 43.947655089211025, 15.54…	Vransko Lake	Croatia	7	5748	biodiversity, flood control, water quality regulation, recreation, eco-tourism, research, livestock	burning, resource extraction, pollution	2007-09-08	Some red burning, illegal fhishing and peachers, illegal garbage disposal	0	26.286
2017-07-06	2855.59	10	2	4	1	2	1	4	8	2836.45	356.949	2	0.0277778	4.88065	0	0	26.365	vransko	29.4751	10.1882	3.58895	0.628821	0.181905	0.0244839	0	50.9659	4.9466	0	0.393025	0.00645738	5764.72	27936	4.84603	3	0	POLYGON ((15.540344970743831 43.952883856404924, 15.540434680815906 43.95275570031538, 15.541101091941869 43.952396863624415, 15.542267312086835 43.952255892195694, 15.542908092534503 43.952089289189416, 15.543728291327625 43.95203802693345, 15.5442665463641 43.95182016167115, 15.544651014632677 43.95148695565854, 15.545663448009748 43.949295486797325, 15.546483646802926 43.947655089211025, 15.54…	Vransko Lake	Croatia	7	5748	biodiversity, flood control, water quality regulation, recreation, eco-tourism, research, livestock	burning, resource extraction, pollution	2007-09-08	Some red burning, illegal fhishing and peachers, illegal garbage disposal	425.7	24.1829
2017-07-11	2908.07	24	5	0	2	0	17	5	24	2830.97	121.17	0	0	0	0	31.7	27.5936	vransko	29.4751	10.1882	3.58895	0.628821	0.181905	0.0244839	0	50.9659	4.9466	0	0.393025	0.00645738	5764.72	27936	4.84603	3	0	POLYGON ((15.540344970743831 43.952883856404924, 15.540434680815906 43.95275570031538, 15.541101091941869 43.952396863624415, 15.542267312086835 43.952255892195694, 15.542908092534503 43.952089289189416, 15.543728291327625 43.95203802693345, 15.5442665463641 43.95182016167115, 15.544651014632677 43.95148695565854, 15.545663448009748 43.949295486797325, 15.546483646802926 43.947655089211025, 15.54…	Vransko Lake	Croatia	7	5748	biodiversity, flood control, water quality regulation, recreation, eco-tourism, research, livestock	burning, resource extraction, pollution	2007-09-08	Some red burning, illegal fhishing and peachers, illegal garbage disposal	31.7	27.0831
2017-07-23	2861.8	17	4	0	2	0	1	14	17	2799.34	168.341	0	0	0	0	0	27.5714	vransko	29.4751	10.1882	3.58895	0.628821	0.181905	0.0244839	0	50.9659	4.9466	0	0.393025	0.00645738	5764.72	27936	4.84603	3	0	POLYGON ((15.540344970743831 43.952883856404924, 15.540434680815906 43.95275570031538, 15.541101091941869 43.952396863624415, 15.542267312086835 43.952255892195694, 15.542908092534503 43.952089289189416, 15.543728291327625 43.95203802693345, 15.5442665463641 43.95182016167115, 15.544651014632677 43.95148695565854, 15.545663448009748 43.949295486797325, 15.546483646802926 43.947655089211025, 15.54…	Vransko Lake	Croatia	7	5748	biodiversity, flood control, water quality regulation, recreation, eco-tourism, research, livestock	burning, resource extraction, pollution	2007-09-08	Some red burning, illegal fhishing and peachers, illegal garbage disposal	0	26.2399
2017-07-30	2855.31	8	0	2	0	1	0	6	8	2833.12	356.914	0	0	0	0	0	26.5493	vransko	29.4751	10.1882	3.58895	0.628821	0.181905	0.0244839	0	50.9659	4.9466	0	0.393025	0.00645738	5764.72	27936	4.84603	3	0	POLYGON ((15.540344970743831 43.952883856404924, 15.540434680815906 43.95275570031538, 15.541101091941869 43.952396863624415, 15.542267312086835 43.952255892195694, 15.542908092534503 43.952089289189416, 15.543728291327625 43.95203802693345, 15.5442665463641 43.95182016167115, 15.544651014632677 43.95148695565854, 15.545663448009748 43.949295486797325, 15.546483646802926 43.947655089211025, 15.54…	Vransko Lake	Croatia	7	5748	biodiversity, flood control, water quality regulation, recreation, eco-tourism, research, livestock	burning, resource extraction, pollution	2007-09-08	Some red burning, illegal fhishing and peachers, illegal garbage disposal	56.3	24.9708
2017-08-04	2890.97	20	2	2	1	1	12	5	19	2823.8	152.156	1	0	0.866207	0	0	31.0057	vransko	29.4751	10.1882	3.58895	0.628821	0.181905	0.0244839	0	50.9659	4.9466	0	0.393025	0.00645738	5764.72	27936	4.84603	3	0	POLYGON ((15.540344970743831 43.952883856404924, 15.540434680815906 43.95275570031538, 15.541101091941869 43.952396863624415, 15.542267312086835 43.952255892195694, 15.542908092534503 43.952089289189416, 15.543728291327625 43.95203802693345, 15.5442665463641 43.95182016167115, 15.544651014632677 43.95148695565854, 15.545663448009748 43.949295486797325, 15.546483646802926 43.947655089211025, 15.54…	Vransko Lake	Croatia	7	5748	biodiversity, flood control, water quality regulation, recreation, eco-tourism, research, livestock	burning, resource extraction, pollution	2007-09-08	Some red burning, illegal fhishing and peachers, illegal garbage disposal	0	28.7586
2017-08-11	2852.84	7	2	2	1	1	0	4	7	2827.15	407.549	0	0	0	0	0	27.17	vransko	29.4751	10.1882	3.58895	0.628821	0.181905	0.0244839	0	50.9659	4.9466	0	0.393025	0.00645738	5764.72	27936	4.84603	3	0	POLYGON ((15.540344970743831 43.952883856404924, 15.540434680815906 43.95275570031538, 15.541101091941869 43.952396863624415, 15.542267312086835 43.952255892195694, 15.542908092534503 43.952089289189416, 15.543728291327625 43.95203802693345, 15.5442665463641 43.95182016167115, 15.544651014632677 43.95148695565854, 15.545663448009748 43.949295486797325, 15.546483646802926 43.947655089211025, 15.54…	Vransko Lake	Croatia	7	5748	biodiversity, flood control, water quality regulation, recreation, eco-tourism, research, livestock	burning, resource extraction, pollution	2007-09-08	Some red burning, illegal fhishing and peachers, illegal garbage disposal	298.5	28.802
2017-08-16	2790.95	17	2	0	1	0	11	5	17	2721.87	164.174	0	0	0	0	0	26.43	vransko	29.4751	10.1882	3.58895	0.628821	0.181905	0.0244839	0	50.9659	4.9466	0	0.393025	0.00645738	5764.72	27936	4.84603	3	0	POLYGON ((15.540344970743831 43.952883856404924, 15.540434680815906 43.95275570031538, 15.541101091941869 43.952396863624415, 15.542267312086835 43.952255892195694, 15.542908092534503 43.952089289189416, 15.543728291327625 43.95203802693345, 15.5442665463641 43.95182016167115, 15.544651014632677 43.95148695565854, 15.545663448009748 43.949295486797325, 15.546483646802926 43.947655089211025, 15.54…	Vransko Lake	Croatia	7	5748	biodiversity, flood control, water quality regulation, recreation, eco-tourism, research, livestock	burning, resource extraction, pollution	2007-09-08	Some red burning, illegal fhishing and peachers, illegal garbage disposal	334.1	25.6423
2017-08-23	2788.65	8	0	2	0	1	0	6	8	2760.19	348.581	0	0	0	0	0	22.2121	vransko	29.4751	10.1882	3.58895	0.628821	0.181905	0.0244839	0	50.9659	4.9466	0	0.393025	0.00645738	5764.72	27936	4.84603	3	0	POLYGON ((15.540344970743831 43.952883856404924, 15.540434680815906 43.95275570031538, 15.541101091941869 43.952396863624415, 15.542267312086835 43.952255892195694, 15.542908092534503 43.952089289189416, 15.543728291327625 43.95203802693345, 15.5442665463641 43.95182016167115, 15.544651014632677 43.95148695565854, 15.545663448009748 43.949295486797325, 15.546483646802926 43.947655089211025, 15.54…	Vransko Lake	Croatia	7	5748	biodiversity, flood control, water quality regulation, recreation, eco-tourism, research, livestock	burning, resource extraction, pollution	2007-09-08	Some red burning, illegal fhishing and peachers, illegal garbage disposal	79.5	24.5119
2017-08-28	2365.34	40	2	23	1	1	11	5	32	1890.88	73.917	8	0.0121457	4.67428	0.675983	0	26.4307	vransko	29.4751	10.1882	3.58895	0.628821	0.181905	0.0244839	0	50.9659	4.9466	0	0.393025	0.00645738	5764.72	27936	4.84603	3	0	POLYGON ((15.540344970743831 43.952883856404924, 15.540434680815906 43.95275570031538, 15.541101091941869 43.952396863624415, 15.542267312086835 43.952255892195694, 15.542908092534503 43.952089289189416, 15.543728291327625 43.95203802693345, 15.5442665463641 43.95182016167115, 15.544651014632677 43.95148695565854, 15.545663448009748 43.949295486797325, 15.546483646802926 43.947655089211025, 15.54…	Vransko Lake	Croatia	7	5748	biodiversity, flood control, water quality regulation, recreation, eco-tourism, research, livestock	burning, resource extraction, pollution	2007-09-08	Some red burning, illegal fhishing and peachers, illegal garbage disposal	0	24.5483
2017-09-04	2836.43	7	23	4	1	2	0	2	5	2822.49	567.287	2	0.0666667	7.32096	0	0	19.3129	vransko	29.4751	10.1882	3.58895	0.628821	0.181905	0.0244839	0	50.9659	4.9466	0	0.393025	0.00645738	5764.72	27936	4.84603	3	0	POLYGON ((15.540344970743831 43.952883856404924, 15.540434680815906 43.95275570031538, 15.541101091941869 43.952396863624415, 15.542267312086835 43.952255892195694, 15.542908092534503 43.952089289189416, 15.543728291327625 43.95203802693345, 15.5442665463641 43.95182016167115, 15.544651014632677 43.95148695565854, 15.545663448009748 43.949295486797325, 15.546483646802926 43.947655089211025, 15.54…	Vransko Lake	Croatia	7	5748	biodiversity, flood control, water quality regulation, recreation, eco-tourism, research, livestock	burning, resource extraction, pollution	2007-09-08	Some red burning, illegal fhishing and peachers, illegal garbage disposal	51	21.6365
2017-09-09	2835.91	11	3	2	1	1	5	3	10	2803.79	283.591	1	0	1.64646	0	0	20.9921	vransko	29.4751	10.1882	3.58895	0.628821	0.181905	0.0244839	0	50.9659	4.9466	0	0.393025	0.00645738	5764.72	27936	4.84603	3	0	POLYGON ((15.540344970743831 43.952883856404924, 15.540434680815906 43.95275570031538, 15.541101091941869 43.952396863624415, 15.542267312086835 43.952255892195694, 15.542908092534503 43.952089289189416, 15.543728291327625 43.95203802693345, 15.5442665463641 43.95182016167115, 15.544651014632677 43.95148695565854, 15.545663448009748 43.949295486797325, 15.546483646802926 43.947655089211025, 15.54…	Vransko Lake	Croatia	7	5748	biodiversity, flood control, water quality regulation, recreation, eco-tourism, research, livestock	burning, resource extraction, pollution	2007-09-08	Some red burning, illegal fhishing and peachers, illegal garbage disposal	585.9	20.1155
2017-09-16	2866.74	6	2	1	1	1	0	4	5	2853.57	573.349	1	0	3.29159	0	647.7	23.065	vransko	29.4751	10.1882	3.58895	0.628821	0.181905	0.0244839	0	50.9659	4.9466	0	0.393025	0.00645738	5764.72	27936	4.84603	3	0	POLYGON ((15.540344970743831 43.952883856404924, 15.540434680815906 43.95275570031538, 15.541101091941869 43.952396863624415, 15.542267312086835 43.952255892195694, 15.542908092534503 43.952089289189416, 15.543728291327625 43.95203802693345, 15.5442665463641 43.95182016167115, 15.544651014632677 43.95148695565854, 15.545663448009748 43.949295486797325, 15.546483646802926 43.947655089211025, 15.54…	Vransko Lake	Croatia	7	5748	biodiversity, flood control, water quality regulation, recreation, eco-tourism, research, livestock	burning, resource extraction, pollution	2007-09-08	Some red burning, illegal fhishing and peachers, illegal garbage disposal	1936.2	20.3939
2017-09-21	2830.79	11	2	1	2	2	4	4	10	2796.46	283.079	1	0	1.64579	0	7.2	15.575	vransko	29.4751	10.1882	3.58895	0.628821	0.181905	0.0244839	0	50.9659	4.9466	0	0.393025	0.00645738	5764.72	27936	4.84603	3	0	POLYGON ((15.540344970743831 43.952883856404924, 15.540434680815906 43.95275570031538, 15.541101091941869 43.952396863624415, 15.542267312086835 43.952255892195694, 15.542908092534503 43.952089289189416, 15.543728291327625 43.95203802693345, 15.5442665463641 43.95182016167115, 15.544651014632677 43.95148695565854, 15.545663448009748 43.949295486797325, 15.546483646802926 43.947655089211025, 15.54…	Vransko Lake	Croatia	7	5748	biodiversity, flood control, water quality regulation, recreation, eco-tourism, research, livestock	burning, resource extraction, pollution	2007-09-08	Some red burning, illegal fhishing and peachers, illegal garbage disposal	1379.9	18.2369
2017-09-28	2774.1	5	3	0	1	0	1	3	5	2759.62	554.82	0	0	0	0	0	17.9336	vransko	29.4751	10.1882	3.58895	0.628821	0.181905	0.0244839	0	50.9659	4.9466	0	0.393025	0.00645738	5764.72	27936	4.84603	3	0	POLYGON ((15.540344970743831 43.952883856404924, 15.540434680815906 43.95275570031538, 15.541101091941869 43.952396863624415, 15.542267312086835 43.952255892195694, 15.542908092534503 43.952089289189416, 15.543728291327625 43.95203802693345, 15.5442665463641 43.95182016167115, 15.544651014632677 43.95148695565854, 15.545663448009748 43.949295486797325, 15.546483646802926 43.947655089211025, 15.54…	Vransko Lake	Croatia	7	5748	biodiversity, flood control, water quality regulation, recreation, eco-tourism, research, livestock	burning, resource extraction, pollution	2007-09-08	Some red burning, illegal fhishing and peachers, illegal garbage disposal	34.1	17.4172
2017-10-03	2846.09	15	0	2	0	1	10	3	14	2803.26	203.292	1	0	1.56596	0	0	17.3457	vransko	29.4751	10.1882	3.58895	0.628821	0.181905	0.0244839	0	50.9659	4.9466	0	0.393025	0.00645738	5764.72	27936	4.84603	3	0	POLYGON ((15.540344970743831 43.952883856404924, 15.540434680815906 43.95275570031538, 15.541101091941869 43.952396863624415, 15.542267312086835 43.952255892195694, 15.542908092534503 43.952089289189416, 15.543728291327625 43.95203802693345, 15.5442665463641 43.95182016167115, 15.544651014632677 43.95148695565854, 15.545663448009748 43.949295486797325, 15.546483646802926 43.947655089211025, 15.54…	Vransko Lake	Croatia	7	5748	biodiversity, flood control, water quality regulation, recreation, eco-tourism, research, livestock	burning, resource extraction, pollution	2007-09-08	Some red burning, illegal fhishing and peachers, illegal garbage disposal	0	16.9357
2017-10-10	2846.13	10	2	4	2	2	0	4	8	2824.29	355.767	2	0.0277778	5.68386	0	0	14.5021	vransko	29.4751	10.1882	3.58895	0.628821	0.181905	0.0244839	0	50.9659	4.9466	0	0.393025	0.00645738	5764.72	27936	4.84603	3	0	POLYGON ((15.540344970743831 43.952883856404924, 15.540434680815906 43.95275570031538, 15.541101091941869 43.952396863624415, 15.542267312086835 43.952255892195694, 15.542908092534503 43.952089289189416, 15.543728291327625 43.95203802693345, 15.5442665463641 43.95182016167115, 15.544651014632677 43.95148695565854, 15.545663448009748 43.949295486797325, 15.546483646802926 43.947655089211025, 15.54…	Vransko Lake	Croatia	7	5748	biodiversity, flood control, water quality regulation, recreation, eco-tourism, research, livestock	burning, resource extraction, pollution	2007-09-08	Some red burning, illegal fhishing and peachers, illegal garbage disposal	262.2	15.5807
2017-10-15	2841.78	15	6	0	2	1	9	4	14	2804.41	202.984	1	0	1.56596	0	0	16.665	vransko	29.4751	10.1882	3.58895	0.628821	0.181905	0.0244839	0	50.9659	4.9466	0	0.393025	0.00645738	5764.72	27936	4.84603	3	0	POLYGON ((15.540344970743831 43.952883856404924, 15.540434680815906 43.95275570031538, 15.541101091941869 43.952396863624415, 15.542267312086835 43.952255892195694, 15.542908092534503 43.952089289189416, 15.543728291327625 43.95203802693345, 15.5442665463641 43.95182016167115, 15.544651014632677 43.95148695565854, 15.545663448009748 43.949295486797325, 15.546483646802926 43.947655089211025, 15.54…	Vransko Lake	Croatia	7	5748	biodiversity, flood control, water quality regulation, recreation, eco-tourism, research, livestock	burning, resource extraction, pollution	2007-09-08	Some red burning, illegal fhishing and peachers, illegal garbage disposal	10.6	15.8567
2017-10-27	2869.29	11	4	0	3	2	1	7	11	2833.68	260.845	0	0	0	0	47.4	14.7364	vransko	29.4751	10.1882	3.58895	0.628821	0.181905	0.0244839	0	50.9659	4.9466	0	0.393025	0.00645738	5764.72	27936	4.84603	3	0	POLYGON ((15.540344970743831 43.952883856404924, 15.540434680815906 43.95275570031538, 15.541101091941869 43.952396863624415, 15.542267312086835 43.952255892195694, 15.542908092534503 43.952089289189416, 15.543728291327625 43.95203802693345, 15.5442665463641 43.95182016167115, 15.544651014632677 43.95148695565854, 15.545663448009748 43.949295486797325, 15.546483646802926 43.947655089211025, 15.54…	Vransko Lake	Croatia	7	5748	biodiversity, flood control, water quality regulation, recreation, eco-tourism, research, livestock	burning, resource extraction, pollution	2007-09-08	Some red burning, illegal fhishing and peachers, illegal garbage disposal	232.9	14.8245
2017-12-02	2758.93	13	3	0	2	1	5	6	12	2723.12	229.911	1	0	1.82697	0	0	6.09071	vransko	29.4751	10.1882	3.58895	0.628821	0.181905	0.0244839	0	50.9659	4.9466	0	0.393025	0.00645738	5764.72	27936	4.84603	3	0	POLYGON ((15.540344970743831 43.952883856404924, 15.540434680815906 43.95275570031538, 15.541101091941869 43.952396863624415, 15.542267312086835 43.952255892195694, 15.542908092534503 43.952089289189416, 15.543728291327625 43.95203802693345, 15.5442665463641 43.95182016167115, 15.544651014632677 43.95148695565854, 15.545663448009748 43.949295486797325, 15.546483646802926 43.947655089211025, 15.54…	Vransko Lake	Croatia	7	5748	biodiversity, flood control, water quality regulation, recreation, eco-tourism, research, livestock	burning, resource extraction, pollution	2007-09-08	Some red burning, illegal fhishing and peachers, illegal garbage disposal	598.1	7.38276
2017-12-09	2895.33	10	2	6	1	2	1	2	6	2881.78	482.554	4	0.166667	12.8402	0	470.9	4.515	vransko	29.4751	10.1882	3.58895	0.628821	0.181905	0.0244839	0	50.9659	4.9466	0	0.393025	0.00645738	5764.72	27936	4.84603	3	0	POLYGON ((15.540344970743831 43.952883856404924, 15.540434680815906 43.95275570031538, 15.541101091941869 43.952396863624415, 15.542267312086835 43.952255892195694, 15.542908092534503 43.952089289189416, 15.543728291327625 43.95203802693345, 15.5442665463641 43.95182016167115, 15.544651014632677 43.95148695565854, 15.545663448009748 43.949295486797325, 15.546483646802926 43.947655089211025, 15.54…	Vransko Lake	Croatia	7	5748	biodiversity, flood control, water quality regulation, recreation, eco-tourism, research, livestock	burning, resource extraction, pollution	2007-09-08	Some red burning, illegal fhishing and peachers, illegal garbage disposal	588.1	6.61133
2017-12-14	2920.13	10	8	1	3	1	4	2	10	2889.51	292.013	0	0	0	0	99.3	11.6864	vransko	29.4751	10.1882	3.58895	0.628821	0.181905	0.0244839	0	50.9659	4.9466	0	0.393025	0.00645738	5764.72	27936	4.84603	3	0	POLYGON ((15.540344970743831 43.952883856404924, 15.540434680815906 43.95275570031538, 15.541101091941869 43.952396863624415, 15.542267312086835 43.952255892195694, 15.542908092534503 43.952089289189416, 15.543728291327625 43.95203802693345, 15.5442665463641 43.95182016167115, 15.544651014632677 43.95148695565854, 15.545663448009748 43.949295486797325, 15.546483646802926 43.947655089211025, 15.54…	Vransko Lake	Croatia	7	5748	biodiversity, flood control, water quality regulation, recreation, eco-tourism, research, livestock	burning, resource extraction, pollution	2007-09-08	Some red burning, illegal fhishing and peachers, illegal garbage disposal	707.6	10.1731
2017-12-21	3021.4	11	3	6	2	2	0	3	6	3008.68	503.566	5	0.222222	15.5476	0	0	5.34286	vransko	29.4751	10.1882	3.58895	0.628821	0.181905	0.0244839	0	50.9659	4.9466	0	0.393025	0.00645738	5764.72	27936	4.84603	3	0	POLYGON ((15.540344970743831 43.952883856404924, 15.540434680815906 43.95275570031538, 15.541101091941869 43.952396863624415, 15.542267312086835 43.952255892195694, 15.542908092534503 43.952089289189416, 15.543728291327625 43.95203802693345, 15.5442665463641 43.95182016167115, 15.544651014632677 43.95148695565854, 15.545663448009748 43.949295486797325, 15.546483646802926 43.947655089211025, 15.54…	Vransko Lake	Croatia	7	5748	biodiversity, flood control, water quality regulation, recreation, eco-tourism, research, livestock	burning, resource extraction, pollution	2007-09-08	Some red burning, illegal fhishing and peachers, illegal garbage disposal	415.7	6.06153
2017-12-26	2817.99	14	6	3	2	2	6	3	12	2786.28	234.833	2	0.0128205	3.37855	0	0	8.82786	vransko	29.4751	10.1882	3.58895	0.628821	0.181905	0.0244839	0	50.9659	4.9466	0	0.393025	0.00645738	5764.72	27936	4.84603	3	0	POLYGON ((15.540344970743831 43.952883856404924, 15.540434680815906 43.95275570031538, 15.541101091941869 43.952396863624415, 15.542267312086835 43.952255892195694, 15.542908092534503 43.952089289189416, 15.543728291327625 43.95203802693345, 15.5442665463641 43.95182016167115, 15.544651014632677 43.95148695565854, 15.545663448009748 43.949295486797325, 15.546483646802926 43.947655089211025, 15.54…	Vransko Lake	Croatia	7	5748	biodiversity, flood control, water quality regulation, recreation, eco-tourism, research, livestock	burning, resource extraction, pollution	2007-09-08	Some red burning, illegal fhishing and peachers, illegal garbage disposal	0	6.94745
2018-01-02	2911.08	8	4	3	1	1	0	4	6	2893.44	485.18	2	0.047619	5.48826	0	168	8.54786	vransko	29.4751	10.1882	3.58895	0.628821	0.181905	0.0244839	0	50.9659	4.9466	0	0.393025	0.00645738	5764.72	27936	4.84603	3	0	POLYGON ((15.540344970743831 43.952883856404924, 15.540434680815906 43.95275570031538, 15.541101091941869 43.952396863624415, 15.542267312086835 43.952255892195694, 15.542908092534503 43.952089289189416, 15.543728291327625 43.95203802693345, 15.5442665463641 43.95182016167115, 15.544651014632677 43.95148695565854, 15.545663448009748 43.949295486797325, 15.546483646802926 43.947655089211025, 15.54…	Vransko Lake	Croatia	7	5748	biodiversity, flood control, water quality regulation, recreation, eco-tourism, research, livestock	burning, resource extraction, pollution	2007-09-08	Some red burning, illegal fhishing and peachers, illegal garbage disposal	273.4	7.88684
2018-01-07	2940.4	20	4	4	2	3	11	3	17	2896.87	172.964	3	0.0175439	3.97617	0	0	13.4279	vransko	29.4751	10.1882	3.58895	0.628821	0.181905	0.0244839	0	50.9659	4.9466	0	0.393025	0.00645738	5764.72	27936	4.84603	3	0	POLYGON ((15.540344970743831 43.952883856404924, 15.540434680815906 43.95275570031538, 15.541101091941869 43.952396863624415, 15.542267312086835 43.952255892195694, 15.542908092534503 43.952089289189416, 15.543728291327625 43.95203802693345, 15.5442665463641 43.95182016167115, 15.544651014632677 43.95148695565854, 15.545663448009748 43.949295486797325, 15.546483646802926 43.947655089211025, 15.54…	Vransko Lake	Croatia	7	5748	biodiversity, flood control, water quality regulation, recreation, eco-tourism, research, livestock	burning, resource extraction, pollution	2007-09-08	Some red burning, illegal fhishing and peachers, illegal garbage disposal	221.9	10.3766
2018-01-14	2974.43	7	4	2	1	2	1	3	6	2958.69	495.739	1	0	2.74481	0	0	6.765	vransko	29.4751	10.1882	3.58895	0.628821	0.181905	0.0244839	0	50.9659	4.9466	0	0.393025	0.00645738	5764.72	27936	4.84603	3	0	POLYGON ((15.540344970743831 43.952883856404924, 15.540434680815906 43.95275570031538, 15.541101091941869 43.952396863624415, 15.542267312086835 43.952255892195694, 15.542908092534503 43.952089289189416, 15.543728291327625 43.95203802693345, 15.5442665463641 43.95182016167115, 15.544651014632677 43.95148695565854, 15.545663448009748 43.949295486797325, 15.546483646802926 43.947655089211025, 15.54…	Vransko Lake	Croatia	7	5748	biodiversity, flood control, water quality regulation, recreation, eco-tourism, research, livestock	burning, resource extraction, pollution	2007-09-08	Some red burning, illegal fhishing and peachers, illegal garbage disposal	122.8	10.1797
2018-01-19	3043.6	15	4	2	3	2	7	3	12	3001.52	253.634	3	0.043956	4.74694	0.132296	0	10.2843	vransko	29.4751	10.1882	3.58895	0.628821	0.181905	0.0244839	0	50.9659	4.9466	0	0.393025	0.00645738	5764.72	27936	4.84603	3	0	POLYGON ((15.540344970743831 43.952883856404924, 15.540434680815906 43.95275570031538, 15.541101091941869 43.952396863624415, 15.542267312086835 43.952255892195694, 15.542908092534503 43.952089289189416, 15.543728291327625 43.95203802693345, 15.5442665463641 43.95182016167115, 15.544651014632677 43.95148695565854, 15.545663448009748 43.949295486797325, 15.546483646802926 43.947655089211025, 15.54…	Vransko Lake	Croatia	7	5748	biodiversity, flood control, water quality regulation, recreation, eco-tourism, research, livestock	burning, resource extraction, pollution	2007-09-08	Some red burning, illegal fhishing and peachers, illegal garbage disposal	262.3	8.46224
2018-01-26	2938.79	11	3	5	2	2	0	4	9	2905.03	326.532	2	0.0222222	3.84264	0	0	7.765	vransko	29.4751	10.1882	3.58895	0.628821	0.181905	0.0244839	0	50.9659	4.9466	0	0.393025	0.00645738	5764.72	27936	4.84603	3	0	POLYGON ((15.540344970743831 43.952883856404924, 15.540434680815906 43.95275570031538, 15.541101091941869 43.952396863624415, 15.542267312086835 43.952255892195694, 15.542908092534503 43.952089289189416, 15.543728291327625 43.95203802693345, 15.5442665463641 43.95182016167115, 15.544651014632677 43.95148695565854, 15.545663448009748 43.949295486797325, 15.546483646802926 43.947655089211025, 15.54…	Vransko Lake	Croatia	7	5748	biodiversity, flood control, water quality regulation, recreation, eco-tourism, research, livestock	burning, resource extraction, pollution	2007-09-08	Some red burning, illegal fhishing and peachers, illegal garbage disposal	187.5	7.53122
2018-01-31	2955.76	12	6	2	2	3	4	4	11	2925.3	268.706	1	0	1.49573	0	0	9.13643	vransko	29.4751	10.1882	3.58895	0.628821	0.181905	0.0244839	0	50.9659	4.9466	0	0.393025	0.00645738	5764.72	27936	4.84603	3	0	POLYGON ((15.540344970743831 43.952883856404924, 15.540434680815906 43.95275570031538, 15.541101091941869 43.952396863624415, 15.542267312086835 43.952255892195694, 15.542908092534503 43.952089289189416, 15.543728291327625 43.95203802693345, 15.5442665463641 43.95182016167115, 15.544651014632677 43.95148695565854, 15.545663448009748 43.949295486797325, 15.546483646802926 43.947655089211025, 15.54…	Vransko Lake	Croatia	7	5748	biodiversity, flood control, water quality regulation, recreation, eco-tourism, research, livestock	burning, resource extraction, pollution	2007-09-08	Some red burning, illegal fhishing and peachers, illegal garbage disposal	9.8	8.3348
2018-02-07	2943.86	9	3	3	2	2	0	4	9	2907.41	327.095	0	0	0	0	131.8	7.64286	vransko	29.4751	10.1882	3.58895	0.628821	0.181905	0.0244839	0	50.9659	4.9466	0	0.393025	0.00645738	5764.72	27936	4.84603	3	0	POLYGON ((15.540344970743831 43.952883856404924, 15.540434680815906 43.95275570031538, 15.541101091941869 43.952396863624415, 15.542267312086835 43.952255892195694, 15.542908092534503 43.952089289189416, 15.543728291327625 43.95203802693345, 15.5442665463641 43.95182016167115, 15.544651014632677 43.95148695565854, 15.545663448009748 43.949295486797325, 15.546483646802926 43.947655089211025, 15.54…	Vransko Lake	Croatia	7	5748	biodiversity, flood control, water quality regulation, recreation, eco-tourism, research, livestock	burning, resource extraction, pollution	2007-09-08	Some red burning, illegal fhishing and peachers, illegal garbage disposal	722.9	7.72918
2018-02-12	2961.05	12	6	0	1	0	8	3	11	2929.42	269.186	1	0	1.49725	0	0	5.23214	vransko	29.4751	10.1882	3.58895	0.628821	0.181905	0.0244839	0	50.9659	4.9466	0	0.393025	0.00645738	5764.72	27936	4.84603	3	0	POLYGON ((15.540344970743831 43.952883856404924, 15.540434680815906 43.95275570031538, 15.541101091941869 43.952396863624415, 15.542267312086835 43.952255892195694, 15.542908092534503 43.952089289189416, 15.543728291327625 43.95203802693345, 15.5442665463641 43.95182016167115, 15.544651014632677 43.95148695565854, 15.545663448009748 43.949295486797325, 15.546483646802926 43.947655089211025, 15.54…	Vransko Lake	Croatia	7	5748	biodiversity, flood control, water quality regulation, recreation, eco-tourism, research, livestock	burning, resource extraction, pollution	2007-09-08	Some red burning, illegal fhishing and peachers, illegal garbage disposal	299.7	5.87561
2018-02-19	2911.84	7	2	3	1	1	0	3	7	2896.17	415.977	0	0	0	0	0	4.81571	vransko	29.4751	10.1882	3.58895	0.628821	0.181905	0.0244839	0	50.9659	4.9466	0	0.393025	0.00645738	5764.72	27936	4.84603	3	0	POLYGON ((15.540344970743831 43.952883856404924, 15.540434680815906 43.95275570031538, 15.541101091941869 43.952396863624415, 15.542267312086835 43.952255892195694, 15.542908092534503 43.952089289189416, 15.543728291327625 43.95203802693345, 15.5442665463641 43.95182016167115, 15.544651014632677 43.95148695565854, 15.545663448009748 43.949295486797325, 15.546483646802926 43.947655089211025, 15.54…	Vransko Lake	Croatia	7	5748	biodiversity, flood control, water quality regulation, recreation, eco-tourism, research, livestock	burning, resource extraction, pollution	2007-09-08	Some red burning, illegal fhishing and peachers, illegal garbage disposal	69	5.01776
2018-02-24	2961.24	12	4	0	1	0	8	3	12	2924.3	246.77	0	0	0	0	26.5	7.04286	vransko	29.4751	10.1882	3.58895	0.628821	0.181905	0.0244839	0	50.9659	4.9466	0	0.393025	0.00645738	5764.72	27936	4.84603	3	0	POLYGON ((15.540344970743831 43.952883856404924, 15.540434680815906 43.95275570031538, 15.541101091941869 43.952396863624415, 15.542267312086835 43.952255892195694, 15.542908092534503 43.952089289189416, 15.543728291327625 43.95203802693345, 15.5442665463641 43.95182016167115, 15.544651014632677 43.95148695565854, 15.545663448009748 43.949295486797325, 15.546483646802926 43.947655089211025, 15.54…	Vransko Lake	Croatia	7	5748	biodiversity, flood control, water quality regulation, recreation, eco-tourism, research, livestock	burning, resource extraction, pollution	2007-09-08	Some red burning, illegal fhishing and peachers, illegal garbage disposal	219	5.83837
2018-03-03	2983.52	10	0	7	0	1	0	3	8	2959.84	372.94	2	0.0277778	4.88172	0	90.5	7.90643	vransko	29.4751	10.1882	3.58895	0.628821	0.181905	0.0244839	0	50.9659	4.9466	0	0.393025	0.00645738	5764.72	27936	4.84603	3	0	POLYGON ((15.540344970743831 43.952883856404924, 15.540434680815906 43.95275570031538, 15.541101091941869 43.952396863624415, 15.542267312086835 43.952255892195694, 15.542908092534503 43.952089289189416, 15.543728291327625 43.95203802693345, 15.5442665463641 43.95182016167115, 15.544651014632677 43.95148695565854, 15.545663448009748 43.949295486797325, 15.546483646802926 43.947655089211025, 15.54…	Vransko Lake	Croatia	7	5748	biodiversity, flood control, water quality regulation, recreation, eco-tourism, research, livestock	burning, resource extraction, pollution	2007-09-08	Some red burning, illegal fhishing and peachers, illegal garbage disposal	379.6	0.903776
2018-03-08	2937.72	10	5	1	1	1	5	3	10	2905.35	293.772	0	0	0	0	138.7	9.22571	vransko	29.4751	10.1882	3.58895	0.628821	0.181905	0.0244839	0	50.9659	4.9466	0	0.393025	0.00645738	5764.72	27936	4.84603	3	0	POLYGON ((15.540344970743831 43.952883856404924, 15.540434680815906 43.95275570031538, 15.541101091941869 43.952396863624415, 15.542267312086835 43.952255892195694, 15.542908092534503 43.952089289189416, 15.543728291327625 43.95203802693345, 15.5442665463641 43.95182016167115, 15.544651014632677 43.95148695565854, 15.545663448009748 43.949295486797325, 15.546483646802926 43.947655089211025, 15.54…	Vransko Lake	Croatia	7	5748	biodiversity, flood control, water quality regulation, recreation, eco-tourism, research, livestock	burning, resource extraction, pollution	2007-09-08	Some red burning, illegal fhishing and peachers, illegal garbage disposal	501.3	8.52306
2018-03-15	2989.51	7	4	0	2	1	1	4	6	2954.97	498.252	1	0	2.74204	0	42.7	11.3307	vransko	29.4751	10.1882	3.58895	0.628821	0.181905	0.0244839	0	50.9659	4.9466	0	0.393025	0.00645738	5764.72	27936	4.84603	3	0	POLYGON ((15.540344970743831 43.952883856404924, 15.540434680815906 43.95275570031538, 15.541101091941869 43.952396863624415, 15.542267312086835 43.952255892195694, 15.542908092534503 43.952089289189416, 15.543728291327625 43.95203802693345, 15.5442665463641 43.95182016167115, 15.544651014632677 43.95148695565854, 15.545663448009748 43.949295486797325, 15.546483646802926 43.947655089211025, 15.54…	Vransko Lake	Croatia	7	5748	biodiversity, flood control, water quality regulation, recreation, eco-tourism, research, livestock	burning, resource extraction, pollution	2007-09-08	Some red burning, illegal fhishing and peachers, illegal garbage disposal	147.7	11.3963
2018-03-20	2874.79	12	3	0	1	0	7	4	11	2834.75	261.345	1	0	1.99301	0	63.6	5.72571	vransko	29.4751	10.1882	3.58895	0.628821	0.181905	0.0244839	0	50.9659	4.9466	0	0.393025	0.00645738	5764.72	27936	4.84603	3	0	POLYGON ((15.540344970743831 43.952883856404924, 15.540434680815906 43.95275570031538, 15.541101091941869 43.952396863624415, 15.542267312086835 43.952255892195694, 15.542908092534503 43.952089289189416, 15.543728291327625 43.95203802693345, 15.5442665463641 43.95182016167115, 15.544651014632677 43.95148695565854, 15.545663448009748 43.949295486797325, 15.546483646802926 43.947655089211025, 15.54…	Vransko Lake	Croatia	7	5748	biodiversity, flood control, water quality regulation, recreation, eco-tourism, research, livestock	burning, resource extraction, pollution	2007-09-08	Some red burning, illegal fhishing and peachers, illegal garbage disposal	212.4	9.40306
2018-03-27	3016.01	13	4	6	3	3	1	3	13	2988.5	232.001	0	0	0	0	0	9.20571	vransko	29.4751	10.1882	3.58895	0.628821	0.181905	0.0244839	0	50.9659	4.9466	0	0.393025	0.00645738	5764.72	27936	4.84603	3	0	POLYGON ((15.540344970743831 43.952883856404924, 15.540434680815906 43.95275570031538, 15.541101091941869 43.952396863624415, 15.542267312086835 43.952255892195694, 15.542908092534503 43.952089289189416, 15.543728291327625 43.95203802693345, 15.5442665463641 43.95182016167115, 15.544651014632677 43.95148695565854, 15.545663448009748 43.949295486797325, 15.546483646802926 43.947655089211025, 15.54…	Vransko Lake	Croatia	7	5748	biodiversity, flood control, water quality regulation, recreation, eco-tourism, research, livestock	burning, resource extraction, pollution	2007-09-08	Some red burning, illegal fhishing and peachers, illegal garbage disposal	0	6.83816
2018-04-01	3004.55	13	7	2	4	3	3	4	11	2971.9	273.141	2	0.0151515	3.19908	0	0	9.63643	vransko	29.4751	10.1882	3.58895	0.628821	0.181905	0.0244839	0	50.9659	4.9466	0	0.393025	0.00645738	5764.72	27936	4.84603	3	0	POLYGON ((15.540344970743831 43.952883856404924, 15.540434680815906 43.95275570031538, 15.541101091941869 43.952396863624415, 15.542267312086835 43.952255892195694, 15.542908092534503 43.952089289189416, 15.543728291327625 43.95203802693345, 15.5442665463641 43.95182016167115, 15.544651014632677 43.95148695565854, 15.545663448009748 43.949295486797325, 15.546483646802926 43.947655089211025, 15.54…	Vransko Lake	Croatia	7	5748	biodiversity, flood control, water quality regulation, recreation, eco-tourism, research, livestock	burning, resource extraction, pollution	2007-09-08	Some red burning, illegal fhishing and peachers, illegal garbage disposal	0	11.0115
2018-04-08	3007.57	10	4	5	1	1	0	4	7	2986.4	429.652	3	0.0833333	8.39239	0	0	14.0557	vransko	29.4751	10.1882	3.58895	0.628821	0.181905	0.0244839	0	50.9659	4.9466	0	0.393025	0.00645738	5764.72	27936	4.84603	3	0	POLYGON ((15.540344970743831 43.952883856404924, 15.540434680815906 43.95275570031538, 15.541101091941869 43.952396863624415, 15.542267312086835 43.952255892195694, 15.542908092534503 43.952089289189416, 15.543728291327625 43.95203802693345, 15.5442665463641 43.95182016167115, 15.544651014632677 43.95148695565854, 15.545663448009748 43.949295486797325, 15.546483646802926 43.947655089211025, 15.54…	Vransko Lake	Croatia	7	5748	biodiversity, flood control, water quality regulation, recreation, eco-tourism, research, livestock	burning, resource extraction, pollution	2007-09-08	Some red burning, illegal fhishing and peachers, illegal garbage disposal	153.2	13.0129
2018-04-13	2867.29	18	4	9	1	4	4	4	17	2820.1	168.664	1	0	0.968349	0	0	15.0114	vransko	29.4751	10.1882	3.58895	0.628821	0.181905	0.0244839	0	50.9659	4.9466	0	0.393025	0.00645738	5764.72	27936	4.84603	3	0	POLYGON ((15.540344970743831 43.952883856404924, 15.540434680815906 43.95275570031538, 15.541101091941869 43.952396863624415, 15.542267312086835 43.952255892195694, 15.542908092534503 43.952089289189416, 15.543728291327625 43.95203802693345, 15.5442665463641 43.95182016167115, 15.544651014632677 43.95148695565854, 15.545663448009748 43.949295486797325, 15.546483646802926 43.947655089211025, 15.54…	Vransko Lake	Croatia	7	5748	biodiversity, flood control, water quality regulation, recreation, eco-tourism, research, livestock	burning, resource extraction, pollution	2007-09-08	Some red burning, illegal fhishing and peachers, illegal garbage disposal	29.7	14.6439
2018-04-20	2987.39	8	11	2	2	2	0	4	6	2970.15	497.899	2	0.047619	6.27514	0	0	20.2507	vransko	29.4751	10.1882	3.58895	0.628821	0.181905	0.0244839	0	50.9659	4.9466	0	0.393025	0.00645738	5764.72	27936	4.84603	3	0	POLYGON ((15.540344970743831 43.952883856404924, 15.540434680815906 43.95275570031538, 15.541101091941869 43.952396863624415, 15.542267312086835 43.952255892195694, 15.542908092534503 43.952089289189416, 15.543728291327625 43.95203802693345, 15.5442665463641 43.95182016167115, 15.544651014632677 43.95148695565854, 15.545663448009748 43.949295486797325, 15.546483646802926 43.947655089211025, 15.54…	Vransko Lake	Croatia	7	5748	biodiversity, flood control, water quality regulation, recreation, eco-tourism, research, livestock	burning, resource extraction, pollution	2007-09-08	Some red burning, illegal fhishing and peachers, illegal garbage disposal	32	17.5696
2018-04-25	3012.64	18	2	5	1	1	7	5	16	2959.22	188.29	2	0	2.25835	0.489911	0	18.9329	vransko	29.4751	10.1882	3.58895	0.628821	0.181905	0.0244839	0	50.9659	4.9466	0	0.393025	0.00645738	5764.72	27936	4.84603	3	0	POLYGON ((15.540344970743831 43.952883856404924, 15.540434680815906 43.95275570031538, 15.541101091941869 43.952396863624415, 15.542267312086835 43.952255892195694, 15.542908092534503 43.952089289189416, 15.543728291327625 43.95203802693345, 15.5442665463641 43.95182016167115, 15.544651014632677 43.95148695565854, 15.545663448009748 43.949295486797325, 15.546483646802926 43.947655089211025, 15.54…	Vransko Lake	Croatia	7	5748	biodiversity, flood control, water quality regulation, recreation, eco-tourism, research, livestock	burning, resource extraction, pollution	2007-09-08	Some red burning, illegal fhishing and peachers, illegal garbage disposal	60.5	18.4862
2018-05-02	3109.59	9	5	2	2	1	0	5	7	3087.58	444.227	2	0.0357143	5.49046	0	0	20.7293	vransko	29.4751	10.1882	3.58895	0.628821	0.181905	0.0244839	0	50.9659	4.9466	0	0.393025	0.00645738	5764.72	27936	4.84603	3	0	POLYGON ((15.540344970743831 43.952883856404924, 15.540434680815906 43.95275570031538, 15.541101091941869 43.952396863624415, 15.542267312086835 43.952255892195694, 15.542908092534503 43.952089289189416, 15.543728291327625 43.95203802693345, 15.5442665463641 43.95182016167115, 15.544651014632677 43.95148695565854, 15.545663448009748 43.949295486797325, 15.546483646802926 43.947655089211025, 15.54…	Vransko Lake	Croatia	7	5748	biodiversity, flood control, water quality regulation, recreation, eco-tourism, research, livestock	burning, resource extraction, pollution	2007-09-08	Some red burning, illegal fhishing and peachers, illegal garbage disposal	182.9	19.5895
2018-05-07	2856.68	14	5	3	1	2	6	4	12	2818.64	238.056	2	0.0128205	2.95475	0	0	21.9286	vransko	29.4751	10.1882	3.58895	0.628821	0.181905	0.0244839	0	50.9659	4.9466	0	0.393025	0.00645738	5764.72	27936	4.84603	3	0	POLYGON ((15.540344970743831 43.952883856404924, 15.540434680815906 43.95275570031538, 15.541101091941869 43.952396863624415, 15.542267312086835 43.952255892195694, 15.542908092534503 43.952089289189416, 15.543728291327625 43.95203802693345, 15.5442665463641 43.95182016167115, 15.544651014632677 43.95148695565854, 15.545663448009748 43.949295486797325, 15.546483646802926 43.947655089211025, 15.54…	Vransko Lake	Croatia	7	5748	biodiversity, flood control, water quality regulation, recreation, eco-tourism, research, livestock	burning, resource extraction, pollution	2007-09-08	Some red burning, illegal fhishing and peachers, illegal garbage disposal	204.1	19.5958
2018-05-14	2996.66	18	4	14	1	2	0	3	13	2962.21	230.512	5	0.0735294	10.1875	0	0	17.3793	vransko	29.4751	10.1882	3.58895	0.628821	0.181905	0.0244839	0	50.9659	4.9466	0	0.393025	0.00645738	5764.72	27936	4.84603	3	0	POLYGON ((15.540344970743831 43.952883856404924, 15.540434680815906 43.95275570031538, 15.541101091941869 43.952396863624415, 15.542267312086835 43.952255892195694, 15.542908092534503 43.952089289189416, 15.543728291327625 43.95203802693345, 15.5442665463641 43.95182016167115, 15.544651014632677 43.95148695565854, 15.545663448009748 43.949295486797325, 15.546483646802926 43.947655089211025, 15.54…	Vransko Lake	Croatia	7	5748	biodiversity, flood control, water quality regulation, recreation, eco-tourism, research, livestock	burning, resource extraction, pollution	2007-09-08	Some red burning, illegal fhishing and peachers, illegal garbage disposal	117.7	19.3629
2018-05-19	2510.31	53	15	36	6	5	8	3	35	2051.61	71.7232	18	0.0294118	7.81004	0.79605	0	19.98	vransko	29.4751	10.1882	3.58895	0.628821	0.181905	0.0244839	0	50.9659	4.9466	0	0.393025	0.00645738	5764.72	27936	4.84603	3	0	POLYGON ((15.540344970743831 43.952883856404924, 15.540434680815906 43.95275570031538, 15.541101091941869 43.952396863624415, 15.542267312086835 43.952255892195694, 15.542908092534503 43.952089289189416, 15.543728291327625 43.95203802693345, 15.5442665463641 43.95182016167115, 15.544651014632677 43.95148695565854, 15.545663448009748 43.949295486797325, 15.546483646802926 43.947655089211025, 15.54…	Vransko Lake	Croatia	7	5748	biodiversity, flood control, water quality regulation, recreation, eco-tourism, research, livestock	burning, resource extraction, pollution	2007-09-08	Some red burning, illegal fhishing and peachers, illegal garbage disposal	59.2	17.3682
2018-05-26	2637.79	22	37	11	5	7	2	4	16	2009.61	164.862	6	0.047619	8.18779	0.277728	0	22.8521	vransko	29.4751	10.1882	3.58895	0.628821	0.181905	0.0244839	0	50.9659	4.9466	0	0.393025	0.00645738	5764.72	27936	4.84603	3	0	POLYGON ((15.540344970743831 43.952883856404924, 15.540434680815906 43.95275570031538, 15.541101091941869 43.952396863624415, 15.542267312086835 43.952255892195694, 15.542908092534503 43.952089289189416, 15.543728291327625 43.95203802693345, 15.5442665463641 43.95182016167115, 15.544651014632677 43.95148695565854, 15.545663448009748 43.949295486797325, 15.546483646802926 43.947655089211025, 15.54…	Vransko Lake	Croatia	7	5748	biodiversity, flood control, water quality regulation, recreation, eco-tourism, research, livestock	burning, resource extraction, pollution	2007-09-08	Some red burning, illegal fhishing and peachers, illegal garbage disposal	118.4	21.2479
2018-05-31	2996.48	24	18	4	4	4	13	3	19	2936.8	157.71	5	0.0395257	7.12641	0	0	23.67	vransko	29.4751	10.1882	3.58895	0.628821	0.181905	0.0244839	0	50.9659	4.9466	0	0.393025	0.00645738	5764.72	27936	4.84603	3	0	POLYGON ((15.540344970743831 43.952883856404924, 15.540434680815906 43.95275570031538, 15.541101091941869 43.952396863624415, 15.542267312086835 43.952255892195694, 15.542908092534503 43.952089289189416, 15.543728291327625 43.95203802693345, 15.5442665463641 43.95182016167115, 15.544651014632677 43.95148695565854, 15.545663448009748 43.949295486797325, 15.546483646802926 43.947655089211025, 15.54…	Vransko Lake	Croatia	7	5748	biodiversity, flood control, water quality regulation, recreation, eco-tourism, research, livestock	burning, resource extraction, pollution	2007-09-08	Some red burning, illegal fhishing and peachers, illegal garbage disposal	121.1	23.0218
2018-06-07	2944.25	11	7	4	3	5	0	4	9	2920.74	327.139	2	0.0222222	4.39283	0	0	24.4164	vransko	29.4751	10.1882	3.58895	0.628821	0.181905	0.0244839	0	50.9659	4.9466	0	0.393025	0.00645738	5764.72	27936	4.84603	3	0	POLYGON ((15.540344970743831 43.952883856404924, 15.540434680815906 43.95275570031538, 15.541101091941869 43.952396863624415, 15.542267312086835 43.952255892195694, 15.542908092534503 43.952089289189416, 15.543728291327625 43.95203802693345, 15.5442665463641 43.95182016167115, 15.544651014632677 43.95148695565854, 15.545663448009748 43.949295486797325, 15.546483646802926 43.947655089211025, 15.54…	Vransko Lake	Croatia	7	5748	biodiversity, flood control, water quality regulation, recreation, eco-tourism, research, livestock	burning, resource extraction, pollution	2007-09-08	Some red burning, illegal fhishing and peachers, illegal garbage disposal	141.5	23.3877
2018-06-12	2918.58	21	5	2	3	2	10	6	20	2785.29	145.929	1	0	1.09618	0	82.3	25.6379	vransko	29.4751	10.1882	3.58895	0.628821	0.181905	0.0244839	0	50.9659	4.9466	0	0.393025	0.00645738	5764.72	27936	4.84603	3	0	POLYGON ((15.540344970743831 43.952883856404924, 15.540434680815906 43.95275570031538, 15.541101091941869 43.952396863624415, 15.542267312086835 43.952255892195694, 15.542908092534503 43.952089289189416, 15.543728291327625 43.95203802693345, 15.5442665463641 43.95182016167115, 15.544651014632677 43.95148695565854, 15.545663448009748 43.949295486797325, 15.546483646802926 43.947655089211025, 15.54…	Vransko Lake	Croatia	7	5748	biodiversity, flood control, water quality regulation, recreation, eco-tourism, research, livestock	burning, resource extraction, pollution	2007-09-08	Some red burning, illegal fhishing and peachers, illegal garbage disposal	242.2	24.0077
2018-06-19	2833.92	9	3	3	1	2	0	5	9	2777.29	314.879	0	0	0	0	138.1	24.6371	vransko	29.4751	10.1882	3.58895	0.628821	0.181905	0.0244839	0	50.9659	4.9466	0	0.393025	0.00645738	5764.72	27936	4.84603	3	0	POLYGON ((15.540344970743831 43.952883856404924, 15.540434680815906 43.95275570031538, 15.541101091941869 43.952396863624415, 15.542267312086835 43.952255892195694, 15.542908092534503 43.952089289189416, 15.543728291327625 43.95203802693345, 15.5442665463641 43.95182016167115, 15.544651014632677 43.95148695565854, 15.545663448009748 43.949295486797325, 15.546483646802926 43.947655089211025, 15.54…	Vransko Lake	Croatia	7	5748	biodiversity, flood control, water quality regulation, recreation, eco-tourism, research, livestock	burning, resource extraction, pollution	2007-09-08	Some red burning, illegal fhishing and peachers, illegal garbage disposal	318.9	23.3104
2018-06-24	2896.07	18	0	2	0	1	10	6	18	2814.5	160.893	0	0	0	0	0	20.5357	vransko	29.4751	10.1882	3.58895	0.628821	0.181905	0.0244839	0	50.9659	4.9466	0	0.393025	0.00645738	5764.72	27936	4.84603	3	0	POLYGON ((15.540344970743831 43.952883856404924, 15.540434680815906 43.95275570031538, 15.541101091941869 43.952396863624415, 15.542267312086835 43.952255892195694, 15.542908092534503 43.952089289189416, 15.543728291327625 43.95203802693345, 15.5442665463641 43.95182016167115, 15.544651014632677 43.95148695565854, 15.545663448009748 43.949295486797325, 15.546483646802926 43.947655089211025, 15.54…	Vransko Lake	Croatia	7	5748	biodiversity, flood control, water quality regulation, recreation, eco-tourism, research, livestock	burning, resource extraction, pollution	2007-09-08	Some red burning, illegal fhishing and peachers, illegal garbage disposal	346.6	22.6219
2018-07-01	2769.5	5	0	2	0	1	0	3	4	2758.02	692.374	1	0	4.11488	0	0	22.1021	vransko	29.4751	10.1882	3.58895	0.628821	0.181905	0.0244839	0	50.9659	4.9466	0	0.393025	0.00645738	5764.72	27936	4.84603	3	0	POLYGON ((15.540344970743831 43.952883856404924, 15.540434680815906 43.95275570031538, 15.541101091941869 43.952396863624415, 15.542267312086835 43.952255892195694, 15.542908092534503 43.952089289189416, 15.543728291327625 43.95203802693345, 15.5442665463641 43.95182016167115, 15.544651014632677 43.95148695565854, 15.545663448009748 43.949295486797325, 15.546483646802926 43.947655089211025, 15.54…	Vransko Lake	Croatia	7	5748	biodiversity, flood control, water quality regulation, recreation, eco-tourism, research, livestock	burning, resource extraction, pollution	2007-09-08	Some red burning, illegal fhishing and peachers, illegal garbage disposal	143.5	21.542
2018-07-13	2843.94	8	2	3	1	1	2	2	5	2828.3	568.789	3	0.142857	10.7877	0	0	24.5336	vransko	29.4751	10.1882	3.58895	0.628821	0.181905	0.0244839	0	50.9659	4.9466	0	0.393025	0.00645738	5764.72	27936	4.84603	3	0	POLYGON ((15.540344970743831 43.952883856404924, 15.540434680815906 43.95275570031538, 15.541101091941869 43.952396863624415, 15.542267312086835 43.952255892195694, 15.542908092534503 43.952089289189416, 15.543728291327625 43.95203802693345, 15.5442665463641 43.95182016167115, 15.544651014632677 43.95148695565854, 15.545663448009748 43.949295486797325, 15.546483646802926 43.947655089211025, 15.54…	Vransko Lake	Croatia	7	5748	biodiversity, flood control, water quality regulation, recreation, eco-tourism, research, livestock	burning, resource extraction, pollution	2007-09-08	Some red burning, illegal fhishing and peachers, illegal garbage disposal	194.6	24.1865
2018-07-18	2755.46	15	4	0	1	0	11	3	15	2712.12	183.697	0	0	0	0	0	24.9864	vransko	29.4751	10.1882	3.58895	0.628821	0.181905	0.0244839	0	50.9659	4.9466	0	0.393025	0.00645738	5764.72	27936	4.84603	3	0	POLYGON ((15.540344970743831 43.952883856404924, 15.540434680815906 43.95275570031538, 15.541101091941869 43.952396863624415, 15.542267312086835 43.952255892195694, 15.542908092534503 43.952089289189416, 15.543728291327625 43.95203802693345, 15.5442665463641 43.95182016167115, 15.544651014632677 43.95148695565854, 15.545663448009748 43.949295486797325, 15.546483646802926 43.947655089211025, 15.54…	Vransko Lake	Croatia	7	5748	biodiversity, flood control, water quality regulation, recreation, eco-tourism, research, livestock	burning, resource extraction, pollution	2007-09-08	Some red burning, illegal fhishing and peachers, illegal garbage disposal	127.8	24.8017
2018-07-25	2828.81	4	0	0	0	0	0	4	4	2816.87	707.203	0	0	0	0	51.4	25.905	vransko	29.4751	10.1882	3.58895	0.628821	0.181905	0.0244839	0	50.9659	4.9466	0	0.393025	0.00645738	5764.72	27936	4.84603	3	0	POLYGON ((15.540344970743831 43.952883856404924, 15.540434680815906 43.95275570031538, 15.541101091941869 43.952396863624415, 15.542267312086835 43.952255892195694, 15.542908092534503 43.952089289189416, 15.543728291327625 43.95203802693345, 15.5442665463641 43.95182016167115, 15.544651014632677 43.95148695565854, 15.545663448009748 43.949295486797325, 15.546483646802926 43.947655089211025, 15.54…	Vransko Lake	Croatia	7	5748	biodiversity, flood control, water quality regulation, recreation, eco-tourism, research, livestock	burning, resource extraction, pollution	2007-09-08	Some red burning, illegal fhishing and peachers, illegal garbage disposal	235	25.3915
2018-07-30	2686.46	17	0	2	0	1	12	3	16	2633.53	167.904	1	0	1.02915	0	0	28.0143	vransko	29.4751	10.1882	3.58895	0.628821	0.181905	0.0244839	0	50.9659	4.9466	0	0.393025	0.00645738	5764.72	27936	4.84603	3	0	POLYGON ((15.540344970743831 43.952883856404924, 15.540434680815906 43.95275570031538, 15.541101091941869 43.952396863624415, 15.542267312086835 43.952255892195694, 15.542908092534503 43.952089289189416, 15.543728291327625 43.95203802693345, 15.5442665463641 43.95182016167115, 15.544651014632677 43.95148695565854, 15.545663448009748 43.949295486797325, 15.546483646802926 43.947655089211025, 15.54…	Vransko Lake	Croatia	7	5748	biodiversity, flood control, water quality regulation, recreation, eco-tourism, research, livestock	burning, resource extraction, pollution	2007-09-08	Some red burning, illegal fhishing and peachers, illegal garbage disposal	92.4	26.1907
2018-08-06	2822.77	6	2	0	1	0	0	5	6	2806.23	470.462	0	0	0	0	0	27.5621	vransko	29.4751	10.1882	3.58895	0.628821	0.181905	0.0244839	0	50.9659	4.9466	0	0.393025	0.00645738	5764.72	27936	4.84603	3	0	POLYGON ((15.540344970743831 43.952883856404924, 15.540434680815906 43.95275570031538, 15.541101091941869 43.952396863624415, 15.542267312086835 43.952255892195694, 15.542908092534503 43.952089289189416, 15.543728291327625 43.95203802693345, 15.5442665463641 43.95182016167115, 15.544651014632677 43.95148695565854, 15.545663448009748 43.949295486797325, 15.546483646802926 43.947655089211025, 15.54…	Vransko Lake	Croatia	7	5748	biodiversity, flood control, water quality regulation, recreation, eco-tourism, research, livestock	burning, resource extraction, pollution	2007-09-08	Some red burning, illegal fhishing and peachers, illegal garbage disposal	278	28.0761
2018-08-11	2854.21	22	0	0	0	0	16	6	21	2785.98	135.915	1	0	0.784081	0	0	27.1071	vransko	29.4751	10.1882	3.58895	0.628821	0.181905	0.0244839	0	50.9659	4.9466	0	0.393025	0.00645738	5764.72	27936	4.84603	3	0	POLYGON ((15.540344970743831 43.952883856404924, 15.540434680815906 43.95275570031538, 15.541101091941869 43.952396863624415, 15.542267312086835 43.952255892195694, 15.542908092534503 43.952089289189416, 15.543728291327625 43.95203802693345, 15.5442665463641 43.95182016167115, 15.544651014632677 43.95148695565854, 15.545663448009748 43.949295486797325, 15.546483646802926 43.947655089211025, 15.54…	Vransko Lake	Croatia	7	5748	biodiversity, flood control, water quality regulation, recreation, eco-tourism, research, livestock	burning, resource extraction, pollution	2007-09-08	Some red burning, illegal fhishing and peachers, illegal garbage disposal	130.4	27.5457
2018-08-11	2850.77	21	4	1	3	3	0	17	20	2785.3	142.538	1	0	0.823285	0	0	27.1071	vransko	29.4751	10.1882	3.58895	0.628821	0.181905	0.0244839	0	50.9659	4.9466	0	0.393025	0.00645738	5764.72	27936	4.84603	3	0	POLYGON ((15.540344970743831 43.952883856404924, 15.540434680815906 43.95275570031538, 15.541101091941869 43.952396863624415, 15.542267312086835 43.952255892195694, 15.542908092534503 43.952089289189416, 15.543728291327625 43.95203802693345, 15.5442665463641 43.95182016167115, 15.544651014632677 43.95148695565854, 15.545663448009748 43.949295486797325, 15.546483646802926 43.947655089211025, 15.54…	Vransko Lake	Croatia	7	5748	biodiversity, flood control, water quality regulation, recreation, eco-tourism, research, livestock	burning, resource extraction, pollution	2007-09-08	Some red burning, illegal fhishing and peachers, illegal garbage disposal	130.4	27.5457
2018-08-18	2813.22	6	0	0	0	0	0	6	6	2797.11	468.871	0	0	0	0	68.5	25.1243	vransko	29.4751	10.1882	3.58895	0.628821	0.181905	0.0244839	0	50.9659	4.9466	0	0.393025	0.00645738	5764.72	27936	4.84603	3	0	POLYGON ((15.540344970743831 43.952883856404924, 15.540434680815906 43.95275570031538, 15.541101091941869 43.952396863624415, 15.542267312086835 43.952255892195694, 15.542908092534503 43.952089289189416, 15.543728291327625 43.95203802693345, 15.5442665463641 43.95182016167115, 15.544651014632677 43.95148695565854, 15.545663448009748 43.949295486797325, 15.546483646802926 43.947655089211025, 15.54…	Vransko Lake	Croatia	7	5748	biodiversity, flood control, water quality regulation, recreation, eco-tourism, research, livestock	burning, resource extraction, pollution	2007-09-08	Some red burning, illegal fhishing and peachers, illegal garbage disposal	398.2	25.1179
2018-08-23	2806.64	17	0	2	0	1	11	4	16	2751.22	175.415	1	0	1.0291	0	0	25.8679	vransko	29.4751	10.1882	3.58895	0.628821	0.181905	0.0244839	0	50.9659	4.9466	0	0.393025	0.00645738	5764.72	27936	4.84603	3	0	POLYGON ((15.540344970743831 43.952883856404924, 15.540434680815906 43.95275570031538, 15.541101091941869 43.952396863624415, 15.542267312086835 43.952255892195694, 15.542908092534503 43.952089289189416, 15.543728291327625 43.95203802693345, 15.5442665463641 43.95182016167115, 15.544651014632677 43.95148695565854, 15.545663448009748 43.949295486797325, 15.546483646802926 43.947655089211025, 15.54…	Vransko Lake	Croatia	7	5748	biodiversity, flood control, water quality regulation, recreation, eco-tourism, research, livestock	burning, resource extraction, pollution	2007-09-08	Some red burning, illegal fhishing and peachers, illegal garbage disposal	68.5	25.8504
2018-08-23	2813.13	17	4	3	2	2	1	11	16	2757.75	175.821	1	0	1.37019	0	0	25.8679	vransko	29.4751	10.1882	3.58895	0.628821	0.181905	0.0244839	0	50.9659	4.9466	0	0.393025	0.00645738	5764.72	27936	4.84603	3	0	POLYGON ((15.540344970743831 43.952883856404924, 15.540434680815906 43.95275570031538, 15.541101091941869 43.952396863624415, 15.542267312086835 43.952255892195694, 15.542908092534503 43.952089289189416, 15.543728291327625 43.95203802693345, 15.5442665463641 43.95182016167115, 15.544651014632677 43.95148695565854, 15.545663448009748 43.949295486797325, 15.546483646802926 43.947655089211025, 15.54…	Vransko Lake	Croatia	7	5748	biodiversity, flood control, water quality regulation, recreation, eco-tourism, research, livestock	burning, resource extraction, pollution	2007-09-08	Some red burning, illegal fhishing and peachers, illegal garbage disposal	68.5	25.8504
2018-08-30	2817.71	5	2	0	1	0	0	4	5	2803.44	563.542	0	0	0	0	1.6	23.555	vransko	29.4751	10.1882	3.58895	0.628821	0.181905	0.0244839	0	50.9659	4.9466	0	0.393025	0.00645738	5764.72	27936	4.84603	3	0	POLYGON ((15.540344970743831 43.952883856404924, 15.540434680815906 43.95275570031538, 15.541101091941869 43.952396863624415, 15.542267312086835 43.952255892195694, 15.542908092534503 43.952089289189416, 15.543728291327625 43.95203802693345, 15.5442665463641 43.95182016167115, 15.544651014632677 43.95148695565854, 15.545663448009748 43.949295486797325, 15.546483646802926 43.947655089211025, 15.54…	Vransko Lake	Croatia	7	5748	biodiversity, flood control, water quality regulation, recreation, eco-tourism, research, livestock	burning, resource extraction, pollution	2007-09-08	Some red burning, illegal fhishing and peachers, illegal garbage disposal	982.4	22.7861
2018-09-04	2600.48	14	0	6	0	1	5	3	12	2545.82	216.707	2	0.0128205	3.38036	0	0	20.2114	vransko	29.4751	10.1882	3.58895	0.628821	0.181905	0.0244839	0	50.9659	4.9466	0	0.393025	0.00645738	5764.72	27936	4.84603	3	0	POLYGON ((15.540344970743831 43.952883856404924, 15.540434680815906 43.95275570031538, 15.541101091941869 43.952396863624415, 15.542267312086835 43.952255892195694, 15.542908092534503 43.952089289189416, 15.543728291327625 43.95203802693345, 15.5442665463641 43.95182016167115, 15.544651014632677 43.95148695565854, 15.545663448009748 43.949295486797325, 15.546483646802926 43.947655089211025, 15.54…	Vransko Lake	Croatia	7	5748	biodiversity, flood control, water quality regulation, recreation, eco-tourism, research, livestock	burning, resource extraction, pollution	2007-09-08	Some red burning, illegal fhishing and peachers, illegal garbage disposal	27	22.2042
2018-09-04	2570.55	17	5	4	4	4	0	9	12	2517.7	214.212	6	0.0416667	8.60366	0.308905	0	20.2114	vransko	29.4751	10.1882	3.58895	0.628821	0.181905	0.0244839	0	50.9659	4.9466	0	0.393025	0.00645738	5764.72	27936	4.84603	3	0	POLYGON ((15.540344970743831 43.952883856404924, 15.540434680815906 43.95275570031538, 15.541101091941869 43.952396863624415, 15.542267312086835 43.952255892195694, 15.542908092534503 43.952089289189416, 15.543728291327625 43.95203802693345, 15.5442665463641 43.95182016167115, 15.544651014632677 43.95148695565854, 15.545663448009748 43.949295486797325, 15.546483646802926 43.947655089211025, 15.54…	Vransko Lake	Croatia	7	5748	biodiversity, flood control, water quality regulation, recreation, eco-tourism, research, livestock	burning, resource extraction, pollution	2007-09-08	Some red burning, illegal fhishing and peachers, illegal garbage disposal	27	22.2042
2018-09-11	2791.67	4	9	0	1	0	1	2	4	2780.53	697.918	0	0	0	0	0	23.1836	vransko	29.4751	10.1882	3.58895	0.628821	0.181905	0.0244839	0	50.9659	4.9466	0	0.393025	0.00645738	5764.72	27936	4.84603	3	0	POLYGON ((15.540344970743831 43.952883856404924, 15.540434680815906 43.95275570031538, 15.541101091941869 43.952396863624415, 15.542267312086835 43.952255892195694, 15.542908092534503 43.952089289189416, 15.543728291327625 43.95203802693345, 15.5442665463641 43.95182016167115, 15.544651014632677 43.95148695565854, 15.545663448009748 43.949295486797325, 15.546483646802926 43.947655089211025, 15.54…	Vransko Lake	Croatia	7	5748	biodiversity, flood control, water quality regulation, recreation, eco-tourism, research, livestock	burning, resource extraction, pollution	2007-09-08	Some red burning, illegal fhishing and peachers, illegal garbage disposal	115.4	22.5046
2018-09-16	2730.22	13	0	2	0	1	8	3	13	2686.6	210.017	0	0	0	0	0	22.7107	vransko	29.4751	10.1882	3.58895	0.628821	0.181905	0.0244839	0	50.9659	4.9466	0	0.393025	0.00645738	5764.72	27936	4.84603	3	0	POLYGON ((15.540344970743831 43.952883856404924, 15.540434680815906 43.95275570031538, 15.541101091941869 43.952396863624415, 15.542267312086835 43.952255892195694, 15.542908092534503 43.952089289189416, 15.543728291327625 43.95203802693345, 15.5442665463641 43.95182016167115, 15.544651014632677 43.95148695565854, 15.545663448009748 43.949295486797325, 15.546483646802926 43.947655089211025, 15.54…	Vransko Lake	Croatia	7	5748	biodiversity, flood control, water quality regulation, recreation, eco-tourism, research, livestock	burning, resource extraction, pollution	2007-09-08	Some red burning, illegal fhishing and peachers, illegal garbage disposal	0	22.9143
2018-09-16	2719.54	12	0	0	0	0	0	12	12	2678.66	226.628	0	0	0	0	0	22.7107	vransko	29.4751	10.1882	3.58895	0.628821	0.181905	0.0244839	0	50.9659	4.9466	0	0.393025	0.00645738	5764.72	27936	4.84603	3	0	POLYGON ((15.540344970743831 43.952883856404924, 15.540434680815906 43.95275570031538, 15.541101091941869 43.952396863624415, 15.542267312086835 43.952255892195694, 15.542908092534503 43.952089289189416, 15.543728291327625 43.95203802693345, 15.5442665463641 43.95182016167115, 15.544651014632677 43.95148695565854, 15.545663448009748 43.949295486797325, 15.546483646802926 43.947655089211025, 15.54…	Vransko Lake	Croatia	7	5748	biodiversity, flood control, water quality regulation, recreation, eco-tourism, research, livestock	burning, resource extraction, pollution	2007-09-08	Some red burning, illegal fhishing and peachers, illegal garbage disposal	0	22.9143
2018-09-23	2830.09	7	3	2	2	2	0	3	7	2814.84	404.299	0	0	0	0	65.1	22.4079	vransko	29.4751	10.1882	3.58895	0.628821	0.181905	0.0244839	0	50.9659	4.9466	0	0.393025	0.00645738	5764.72	27936	4.84603	3	0	POLYGON ((15.540344970743831 43.952883856404924, 15.540434680815906 43.95275570031538, 15.541101091941869 43.952396863624415, 15.542267312086835 43.952255892195694, 15.542908092534503 43.952089289189416, 15.543728291327625 43.95203802693345, 15.5442665463641 43.95182016167115, 15.544651014632677 43.95148695565854, 15.545663448009748 43.949295486797325, 15.546483646802926 43.947655089211025, 15.54…	Vransko Lake	Croatia	7	5748	biodiversity, flood control, water quality regulation, recreation, eco-tourism, research, livestock	burning, resource extraction, pollution	2007-09-08	Some red burning, illegal fhishing and peachers, illegal garbage disposal	223.5	22.5292
2018-09-28	2808.83	16	2	2	1	2	8	5	16	2764.12	175.552	0	0	0	0	0	17.8764	vransko	29.4751	10.1882	3.58895	0.628821	0.181905	0.0244839	0	50.9659	4.9466	0	0.393025	0.00645738	5764.72	27936	4.84603	3	0	POLYGON ((15.540344970743831 43.952883856404924, 15.540434680815906 43.95275570031538, 15.541101091941869 43.952396863624415, 15.542267312086835 43.952255892195694, 15.542908092534503 43.952089289189416, 15.543728291327625 43.95203802693345, 15.5442665463641 43.95182016167115, 15.544651014632677 43.95148695565854, 15.545663448009748 43.949295486797325, 15.546483646802926 43.947655089211025, 15.54…	Vransko Lake	Croatia	7	5748	biodiversity, flood control, water quality regulation, recreation, eco-tourism, research, livestock	burning, resource extraction, pollution	2007-09-08	Some red burning, illegal fhishing and peachers, illegal garbage disposal	451.2	17.4258
2018-10-05	2596.59	12	2	7	1	1	0	4	11	2566.46	236.053	1	0	1.49688	0	0	18.1693	vransko	29.4751	10.1882	3.58895	0.628821	0.181905	0.0244839	0	50.9659	4.9466	0	0.393025	0.00645738	5764.72	27936	4.84603	3	0	POLYGON ((15.540344970743831 43.952883856404924, 15.540434680815906 43.95275570031538, 15.541101091941869 43.952396863624415, 15.542267312086835 43.952255892195694, 15.542908092534503 43.952089289189416, 15.543728291327625 43.95203802693345, 15.5442665463641 43.95182016167115, 15.544651014632677 43.95148695565854, 15.545663448009748 43.949295486797325, 15.546483646802926 43.947655089211025, 15.54…	Vransko Lake	Croatia	7	5748	biodiversity, flood control, water quality regulation, recreation, eco-tourism, research, livestock	burning, resource extraction, pollution	2007-09-08	Some red burning, illegal fhishing and peachers, illegal garbage disposal	83.9	16.9012
2018-10-10	2614.49	19	7	6	1	4	8	4	18	2568.18	145.249	1	0	0.91437	0	0	18.7264	vransko	29.4751	10.1882	3.58895	0.628821	0.181905	0.0244839	0	50.9659	4.9466	0	0.393025	0.00645738	5764.72	27936	4.84603	3	0	POLYGON ((15.540344970743831 43.952883856404924, 15.540434680815906 43.95275570031538, 15.541101091941869 43.952396863624415, 15.542267312086835 43.952255892195694, 15.542908092534503 43.952089289189416, 15.543728291327625 43.95203802693345, 15.5442665463641 43.95182016167115, 15.544651014632677 43.95148695565854, 15.545663448009748 43.949295486797325, 15.546483646802926 43.947655089211025, 15.54…	Vransko Lake	Croatia	7	5748	biodiversity, flood control, water quality regulation, recreation, eco-tourism, research, livestock	burning, resource extraction, pollution	2007-09-08	Some red burning, illegal fhishing and peachers, illegal garbage disposal	0	18.8149
2018-10-17	2824.57	4	7	0	2	0	0	2	4	2814.26	706.143	0	0	0	0	0	18.3121	vransko	29.4751	10.1882	3.58895	0.628821	0.181905	0.0244839	0	50.9659	4.9466	0	0.393025	0.00645738	5764.72	27936	4.84603	3	0	POLYGON ((15.540344970743831 43.952883856404924, 15.540434680815906 43.95275570031538, 15.541101091941869 43.952396863624415, 15.542267312086835 43.952255892195694, 15.542908092534503 43.952089289189416, 15.543728291327625 43.95203802693345, 15.5442665463641 43.95182016167115, 15.544651014632677 43.95148695565854, 15.545663448009748 43.949295486797325, 15.546483646802926 43.947655089211025, 15.54…	Vransko Lake	Croatia	7	5748	biodiversity, flood control, water quality regulation, recreation, eco-tourism, research, livestock	burning, resource extraction, pollution	2007-09-08	Some red burning, illegal fhishing and peachers, illegal garbage disposal	10.9	17.8265
2018-10-22	2731.27	16	0	2	0	1	11	3	15	2686.73	182.084	1	0	1.46153	0	0	14.2543	vransko	29.4751	10.1882	3.58895	0.628821	0.181905	0.0244839	0	50.9659	4.9466	0	0.393025	0.00645738	5764.72	27936	4.84603	3	0	POLYGON ((15.540344970743831 43.952883856404924, 15.540434680815906 43.95275570031538, 15.541101091941869 43.952396863624415, 15.542267312086835 43.952255892195694, 15.542908092534503 43.952089289189416, 15.543728291327625 43.95203802693345, 15.5442665463641 43.95182016167115, 15.544651014632677 43.95148695565854, 15.545663448009748 43.949295486797325, 15.546483646802926 43.947655089211025, 15.54…	Vransko Lake	Croatia	7	5748	biodiversity, flood control, water quality regulation, recreation, eco-tourism, research, livestock	burning, resource extraction, pollution	2007-09-08	Some red burning, illegal fhishing and peachers, illegal garbage disposal	0	16.9742
2018-10-22	2739.26	16	6	2	4	4	0	10	15	2695.15	182.617	1	0	1.46153	0	0	14.2543	vransko	29.4751	10.1882	3.58895	0.628821	0.181905	0.0244839	0	50.9659	4.9466	0	0.393025	0.00645738	5764.72	27936	4.84603	3	0	POLYGON ((15.540344970743831 43.952883856404924, 15.540434680815906 43.95275570031538, 15.541101091941869 43.952396863624415, 15.542267312086835 43.952255892195694, 15.542908092534503 43.952089289189416, 15.543728291327625 43.95203802693345, 15.5442665463641 43.95182016167115, 15.544651014632677 43.95148695565854, 15.545663448009748 43.949295486797325, 15.546483646802926 43.947655089211025, 15.54…	Vransko Lake	Croatia	7	5748	biodiversity, flood control, water quality regulation, recreation, eco-tourism, research, livestock	burning, resource extraction, pollution	2007-09-08	Some red burning, illegal fhishing and peachers, illegal garbage disposal	0	16.9742
2018-10-29	2809.23	5	2	0	1	0	2	2	5	2796.06	561.846	0	0	0	0	594.8	19.7057	vransko	29.4751	10.1882	3.58895	0.628821	0.181905	0.0244839	0	50.9659	4.9466	0	0.393025	0.00645738	5764.72	27936	4.84603	3	0	POLYGON ((15.540344970743831 43.952883856404924, 15.540434680815906 43.95275570031538, 15.541101091941869 43.952396863624415, 15.542267312086835 43.952255892195694, 15.542908092534503 43.952089289189416, 15.543728291327625 43.95203802693345, 15.5442665463641 43.95182016167115, 15.544651014632677 43.95148695565854, 15.545663448009748 43.949295486797325, 15.546483646802926 43.947655089211025, 15.54…	Vransko Lake	Croatia	7	5748	biodiversity, flood control, water quality regulation, recreation, eco-tourism, research, livestock	burning, resource extraction, pollution	2007-09-08	Some red burning, illegal fhishing and peachers, illegal garbage disposal	724	17.4482
2018-11-03	2747.46	10	0	0	0	0	7	3	10	2713.83	274.746	0	0	0	0	0	17.4457	vransko	29.4751	10.1882	3.58895	0.628821	0.181905	0.0244839	0	50.9659	4.9466	0	0.393025	0.00645738	5764.72	27936	4.84603	3	0	POLYGON ((15.540344970743831 43.952883856404924, 15.540434680815906 43.95275570031538, 15.541101091941869 43.952396863624415, 15.542267312086835 43.952255892195694, 15.542908092534503 43.952089289189416, 15.543728291327625 43.95203802693345, 15.5442665463641 43.95182016167115, 15.544651014632677 43.95148695565854, 15.545663448009748 43.949295486797325, 15.546483646802926 43.947655089211025, 15.54…	Vransko Lake	Croatia	7	5748	biodiversity, flood control, water quality regulation, recreation, eco-tourism, research, livestock	burning, resource extraction, pollution	2007-09-08	Some red burning, illegal fhishing and peachers, illegal garbage disposal	954.7	17.6905
2018-11-10	2807.98	4	0	0	0	0	0	4	4	2797.4	701.995	0	0	0	0	0	13.76	vransko	29.4751	10.1882	3.58895	0.628821	0.181905	0.0244839	0	50.9659	4.9466	0	0.393025	0.00645738	5764.72	27936	4.84603	3	0	POLYGON ((15.540344970743831 43.952883856404924, 15.540434680815906 43.95275570031538, 15.541101091941869 43.952396863624415, 15.542267312086835 43.952255892195694, 15.542908092534503 43.952089289189416, 15.543728291327625 43.95203802693345, 15.5442665463641 43.95182016167115, 15.544651014632677 43.95148695565854, 15.545663448009748 43.949295486797325, 15.546483646802926 43.947655089211025, 15.54…	Vransko Lake	Croatia	7	5748	biodiversity, flood control, water quality regulation, recreation, eco-tourism, research, livestock	burning, resource extraction, pollution	2007-09-08	Some red burning, illegal fhishing and peachers, illegal garbage disposal	0	15.6959
2018-11-15	2819.79	15	0	0	0	0	11	4	14	2776.49	201.414	1	0	1.56599	0	0	12.2864	vransko	29.4751	10.1882	3.58895	0.628821	0.181905	0.0244839	0	50.9659	4.9466	0	0.393025	0.00645738	5764.72	27936	4.84603	3	0	POLYGON ((15.540344970743831 43.952883856404924, 15.540434680815906 43.95275570031538, 15.541101091941869 43.952396863624415, 15.542267312086835 43.952255892195694, 15.542908092534503 43.952089289189416, 15.543728291327625 43.95203802693345, 15.5442665463641 43.95182016167115, 15.544651014632677 43.95148695565854, 15.545663448009748 43.949295486797325, 15.546483646802926 43.947655089211025, 15.54…	Vransko Lake	Croatia	7	5748	biodiversity, flood control, water quality regulation, recreation, eco-tourism, research, livestock	burning, resource extraction, pollution	2007-09-08	Some red burning, illegal fhishing and peachers, illegal garbage disposal	27.5	13.9088
2018-11-22	2835.39	3	0	0	0	0	0	3	3	2826.78	945.129	0	0	0	0	0	11.0814	vransko	29.4751	10.1882	3.58895	0.628821	0.181905	0.0244839	0	50.9659	4.9466	0	0.393025	0.00645738	5764.72	27936	4.84603	3	0	POLYGON ((15.540344970743831 43.952883856404924, 15.540434680815906 43.95275570031538, 15.541101091941869 43.952396863624415, 15.542267312086835 43.952255892195694, 15.542908092534503 43.952089289189416, 15.543728291327625 43.95203802693345, 15.5442665463641 43.95182016167115, 15.544651014632677 43.95148695565854, 15.545663448009748 43.949295486797325, 15.546483646802926 43.947655089211025, 15.54…	Vransko Lake	Croatia	7	5748	biodiversity, flood control, water quality regulation, recreation, eco-tourism, research, livestock	burning, resource extraction, pollution	2007-09-08	Some red burning, illegal fhishing and peachers, illegal garbage disposal	0	9.20694
2018-11-27	2621.14	13	0	2	0	1	9	2	13	2589.57	201.626	0	0	0	0	209	8.52786	vransko	29.4751	10.1882	3.58895	0.628821	0.181905	0.0244839	0	50.9659	4.9466	0	0.393025	0.00645738	5764.72	27936	4.84603	3	0	POLYGON ((15.540344970743831 43.952883856404924, 15.540434680815906 43.95275570031538, 15.541101091941869 43.952396863624415, 15.542267312086835 43.952255892195694, 15.542908092534503 43.952089289189416, 15.543728291327625 43.95203802693345, 15.5442665463641 43.95182016167115, 15.544651014632677 43.95148695565854, 15.545663448009748 43.949295486797325, 15.546483646802926 43.947655089211025, 15.54…	Vransko Lake	Croatia	7	5748	biodiversity, flood control, water quality regulation, recreation, eco-tourism, research, livestock	burning, resource extraction, pollution	2007-09-08	Some red burning, illegal fhishing and peachers, illegal garbage disposal	774.8	11.2528
2018-11-27	2621.36	14	0	2	0	1	0	12	13	2590.12	201.643	1	0	1.26661	0	209	8.52786	vransko	29.4751	10.1882	3.58895	0.628821	0.181905	0.0244839	0	50.9659	4.9466	0	0.393025	0.00645738	5764.72	27936	4.84603	3	0	POLYGON ((15.540344970743831 43.952883856404924, 15.540434680815906 43.95275570031538, 15.541101091941869 43.952396863624415, 15.542267312086835 43.952255892195694, 15.542908092534503 43.952089289189416, 15.543728291327625 43.95203802693345, 15.5442665463641 43.95182016167115, 15.544651014632677 43.95148695565854, 15.545663448009748 43.949295486797325, 15.546483646802926 43.947655089211025, 15.54…	Vransko Lake	Croatia	7	5748	biodiversity, flood control, water quality regulation, recreation, eco-tourism, research, livestock	burning, resource extraction, pollution	2007-09-08	Some red burning, illegal fhishing and peachers, illegal garbage disposal	774.8	11.2528
2018-12-04	2845.13	5	4	2	2	1	0	1	4	2835.9	711.282	1	0	4.11341	0	117.1	12.9343	vransko	29.4751	10.1882	3.58895	0.628821	0.181905	0.0244839	0	50.9659	4.9466	0	0.393025	0.00645738	5764.72	27936	4.84603	3	0	POLYGON ((15.540344970743831 43.952883856404924, 15.540434680815906 43.95275570031538, 15.541101091941869 43.952396863624415, 15.542267312086835 43.952255892195694, 15.542908092534503 43.952089289189416, 15.543728291327625 43.95203802693345, 15.5442665463641 43.95182016167115, 15.544651014632677 43.95148695565854, 15.545663448009748 43.949295486797325, 15.546483646802926 43.947655089211025, 15.54…	Vransko Lake	Croatia	7	5748	biodiversity, flood control, water quality regulation, recreation, eco-tourism, research, livestock	burning, resource extraction, pollution	2007-09-08	Some red burning, illegal fhishing and peachers, illegal garbage disposal	146.2	8.63245
2018-12-09	2807.5	8	3	1	1	1	4	2	8	2778.73	350.937	0	0	0	0	92.8	8.81714	vransko	29.4751	10.1882	3.58895	0.628821	0.181905	0.0244839	0	50.9659	4.9466	0	0.393025	0.00645738	5764.72	27936	4.84603	3	0	POLYGON ((15.540344970743831 43.952883856404924, 15.540434680815906 43.95275570031538, 15.541101091941869 43.952396863624415, 15.542267312086835 43.952255892195694, 15.542908092534503 43.952089289189416, 15.543728291327625 43.95203802693345, 15.5442665463641 43.95182016167115, 15.544651014632677 43.95148695565854, 15.545663448009748 43.949295486797325, 15.546483646802926 43.947655089211025, 15.54…	Vransko Lake	Croatia	7	5748	biodiversity, flood control, water quality regulation, recreation, eco-tourism, research, livestock	burning, resource extraction, pollution	2007-09-08	Some red burning, illegal fhishing and peachers, illegal garbage disposal	393.9	9.8202
2018-12-09	2806.08	10	0	3	0	1	0	7	8	2777.62	350.76	2	0.0277778	4.27126	0	92.8	8.81714	vransko	29.4751	10.1882	3.58895	0.628821	0.181905	0.0244839	0	50.9659	4.9466	0	0.393025	0.00645738	5764.72	27936	4.84603	3	0	POLYGON ((15.540344970743831 43.952883856404924, 15.540434680815906 43.95275570031538, 15.541101091941869 43.952396863624415, 15.542267312086835 43.952255892195694, 15.542908092534503 43.952089289189416, 15.543728291327625 43.95203802693345, 15.5442665463641 43.95182016167115, 15.544651014632677 43.95148695565854, 15.545663448009748 43.949295486797325, 15.546483646802926 43.947655089211025, 15.54…	Vransko Lake	Croatia	7	5748	biodiversity, flood control, water quality regulation, recreation, eco-tourism, research, livestock	burning, resource extraction, pollution	2007-09-08	Some red burning, illegal fhishing and peachers, illegal garbage disposal	393.9	9.8202
2018-12-16	2795.53	5	4	2	1	1	0	2	4	2785.2	698.882	1	0	5.48092	0	0	2.78357	vransko	29.4751	10.1882	3.58895	0.628821	0.181905	0.0244839	0	50.9659	4.9466	0	0.393025	0.00645738	5764.72	27936	4.84603	3	0	POLYGON ((15.540344970743831 43.952883856404924, 15.540434680815906 43.95275570031538, 15.541101091941869 43.952396863624415, 15.542267312086835 43.952255892195694, 15.542908092534503 43.952089289189416, 15.543728291327625 43.95203802693345, 15.5442665463641 43.95182016167115, 15.544651014632677 43.95148695565854, 15.545663448009748 43.949295486797325, 15.546483646802926 43.947655089211025, 15.54…	Vransko Lake	Croatia	7	5748	biodiversity, flood control, water quality regulation, recreation, eco-tourism, research, livestock	burning, resource extraction, pollution	2007-09-08	Some red burning, illegal fhishing and peachers, illegal garbage disposal	151.9	4.85959
2018-12-21	2804.49	8	2	0	1	0	5	2	8	2779.54	350.561	0	0	0	0	65.4	9.11714	vransko	29.4751	10.1882	3.58895	0.628821	0.181905	0.0244839	0	50.9659	4.9466	0	0.393025	0.00645738	5764.72	27936	4.84603	3	0	POLYGON ((15.540344970743831 43.952883856404924, 15.540434680815906 43.95275570031538, 15.541101091941869 43.952396863624415, 15.542267312086835 43.952255892195694, 15.542908092534503 43.952089289189416, 15.543728291327625 43.95203802693345, 15.5442665463641 43.95182016167115, 15.544651014632677 43.95148695565854, 15.545663448009748 43.949295486797325, 15.546483646802926 43.947655089211025, 15.54…	Vransko Lake	Croatia	7	5748	biodiversity, flood control, water quality regulation, recreation, eco-tourism, research, livestock	burning, resource extraction, pollution	2007-09-08	Some red burning, illegal fhishing and peachers, illegal garbage disposal	85.8	5.53592
2018-12-21	2808.28	8	0	0	0	0	0	8	8	2783.33	351.035	0	0	0	0	65.4	9.11714	vransko	29.4751	10.1882	3.58895	0.628821	0.181905	0.0244839	0	50.9659	4.9466	0	0.393025	0.00645738	5764.72	27936	4.84603	3	0	POLYGON ((15.540344970743831 43.952883856404924, 15.540434680815906 43.95275570031538, 15.541101091941869 43.952396863624415, 15.542267312086835 43.952255892195694, 15.542908092534503 43.952089289189416, 15.543728291327625 43.95203802693345, 15.5442665463641 43.95182016167115, 15.544651014632677 43.95148695565854, 15.545663448009748 43.949295486797325, 15.546483646802926 43.947655089211025, 15.54…	Vransko Lake	Croatia	7	5748	biodiversity, flood control, water quality regulation, recreation, eco-tourism, research, livestock	burning, resource extraction, pollution	2007-09-08	Some red burning, illegal fhishing and peachers, illegal garbage disposal	85.8	5.53592
2018-12-28	2849.5	5	0	3	0	1	0	2	4	2839.33	712.376	1	0	5.4809	0	0	6.24571	vransko	29.4751	10.1882	3.58895	0.628821	0.181905	0.0244839	0	50.9659	4.9466	0	0.393025	0.00645738	5764.72	27936	4.84603	3	0	POLYGON ((15.540344970743831 43.952883856404924, 15.540434680815906 43.95275570031538, 15.541101091941869 43.952396863624415, 15.542267312086835 43.952255892195694, 15.542908092534503 43.952089289189416, 15.543728291327625 43.95203802693345, 15.5442665463641 43.95182016167115, 15.544651014632677 43.95148695565854, 15.545663448009748 43.949295486797325, 15.546483646802926 43.947655089211025, 15.54…	Vransko Lake	Croatia	7	5748	biodiversity, flood control, water quality regulation, recreation, eco-tourism, research, livestock	burning, resource extraction, pollution	2007-09-08	Some red burning, illegal fhishing and peachers, illegal garbage disposal	32.4	8.69939
2019-01-02	2788.69	14	3	2	1	1	10	1	12	2755.45	232.391	2	0.0128205	3.37841	0	11.7	5.42143	vransko	29.4751	10.1882	3.58895	0.628821	0.181905	0.0244839	0	50.9659	4.9466	0	0.393025	0.00645738	5764.72	27936	4.84603	3	0	POLYGON ((15.540344970743831 43.952883856404924, 15.540434680815906 43.95275570031538, 15.541101091941869 43.952396863624415, 15.542267312086835 43.952255892195694, 15.542908092534503 43.952089289189416, 15.543728291327625 43.95203802693345, 15.5442665463641 43.95182016167115, 15.544651014632677 43.95148695565854, 15.545663448009748 43.949295486797325, 15.546483646802926 43.947655089211025, 15.54…	Vransko Lake	Croatia	7	5748	biodiversity, flood control, water quality regulation, recreation, eco-tourism, research, livestock	burning, resource extraction, pollution	2007-09-08	Some red burning, illegal fhishing and peachers, illegal garbage disposal	71.3	7.23531
2019-01-02	2781.76	13	6	0	6	6	0	7	12	2748.35	231.813	1	0	1.82695	0	11.7	5.42143	vransko	29.4751	10.1882	3.58895	0.628821	0.181905	0.0244839	0	50.9659	4.9466	0	0.393025	0.00645738	5764.72	27936	4.84603	3	0	POLYGON ((15.540344970743831 43.952883856404924, 15.540434680815906 43.95275570031538, 15.541101091941869 43.952396863624415, 15.542267312086835 43.952255892195694, 15.542908092534503 43.952089289189416, 15.543728291327625 43.95203802693345, 15.5442665463641 43.95182016167115, 15.544651014632677 43.95148695565854, 15.545663448009748 43.949295486797325, 15.546483646802926 43.947655089211025, 15.54…	Vransko Lake	Croatia	7	5748	biodiversity, flood control, water quality regulation, recreation, eco-tourism, research, livestock	burning, resource extraction, pollution	2007-09-08	Some red burning, illegal fhishing and peachers, illegal garbage disposal	71.3	7.23531
2019-01-09	2835.19	5	5	2	2	1	0	1	5	2818.89	567.038	0	0	0	0	0	5.62714	vransko	29.4751	10.1882	3.58895	0.628821	0.181905	0.0244839	0	50.9659	4.9466	0	0.393025	0.00645738	5764.72	27936	4.84603	3	0	POLYGON ((15.540344970743831 43.952883856404924, 15.540434680815906 43.95275570031538, 15.541101091941869 43.952396863624415, 15.542267312086835 43.952255892195694, 15.542908092534503 43.952089289189416, 15.543728291327625 43.95203802693345, 15.5442665463641 43.95182016167115, 15.544651014632677 43.95148695565854, 15.545663448009748 43.949295486797325, 15.546483646802926 43.947655089211025, 15.54…	Vransko Lake	Croatia	7	5748	biodiversity, flood control, water quality regulation, recreation, eco-tourism, research, livestock	burning, resource extraction, pollution	2007-09-08	Some red burning, illegal fhishing and peachers, illegal garbage disposal	356.3	3.65673
2019-01-14	2884.07	14	3	0	1	0	11	2	14	2843.84	206.005	0	0	0	0	23.1	7.76714	vransko	29.4751	10.1882	3.58895	0.628821	0.181905	0.0244839	0	50.9659	4.9466	0	0.393025	0.00645738	5764.72	27936	4.84603	3	0	POLYGON ((15.540344970743831 43.952883856404924, 15.540434680815906 43.95275570031538, 15.541101091941869 43.952396863624415, 15.542267312086835 43.952255892195694, 15.542908092534503 43.952089289189416, 15.543728291327625 43.95203802693345, 15.5442665463641 43.95182016167115, 15.544651014632677 43.95148695565854, 15.545663448009748 43.949295486797325, 15.546483646802926 43.947655089211025, 15.54…	Vransko Lake	Croatia	7	5748	biodiversity, flood control, water quality regulation, recreation, eco-tourism, research, livestock	burning, resource extraction, pollution	2007-09-08	Some red burning, illegal fhishing and peachers, illegal garbage disposal	260.4	4.94449
2019-01-21	2756.88	3	0	0	0	0	0	3	3	2748.41	918.96	0	0	0	0	0	4.525	vransko	29.4751	10.1882	3.58895	0.628821	0.181905	0.0244839	0	50.9659	4.9466	0	0.393025	0.00645738	5764.72	27936	4.84603	3	0	POLYGON ((15.540344970743831 43.952883856404924, 15.540434680815906 43.95275570031538, 15.541101091941869 43.952396863624415, 15.542267312086835 43.952255892195694, 15.542908092534503 43.952089289189416, 15.543728291327625 43.95203802693345, 15.5442665463641 43.95182016167115, 15.544651014632677 43.95148695565854, 15.545663448009748 43.949295486797325, 15.546483646802926 43.947655089211025, 15.54…	Vransko Lake	Croatia	7	5748	biodiversity, flood control, water quality regulation, recreation, eco-tourism, research, livestock	burning, resource extraction, pollution	2007-09-08	Some red burning, illegal fhishing and peachers, illegal garbage disposal	86.6	6.46694
2019-01-26	2734.73	11	0	2	0	1	7	2	10	2706.29	273.473	1	0	2.19236	0	0	4.645	vransko	29.4751	10.1882	3.58895	0.628821	0.181905	0.0244839	0	50.9659	4.9466	0	0.393025	0.00645738	5764.72	27936	4.84603	3	0	POLYGON ((15.540344970743831 43.952883856404924, 15.540434680815906 43.95275570031538, 15.541101091941869 43.952396863624415, 15.542267312086835 43.952255892195694, 15.542908092534503 43.952089289189416, 15.543728291327625 43.95203802693345, 15.5442665463641 43.95182016167115, 15.544651014632677 43.95148695565854, 15.545663448009748 43.949295486797325, 15.546483646802926 43.947655089211025, 15.54…	Vransko Lake	Croatia	7	5748	biodiversity, flood control, water quality regulation, recreation, eco-tourism, research, livestock	burning, resource extraction, pollution	2007-09-08	Some red burning, illegal fhishing and peachers, illegal garbage disposal	211.4	4.74531
2019-02-02	2831.12	7	2	2	1	2	1	3	6	2813.32	471.854	1	0	3.65395	0	27.6	13.9471	vransko	29.4751	10.1882	3.58895	0.628821	0.181905	0.0244839	0	50.9659	4.9466	0	0.393025	0.00645738	5764.72	27936	4.84603	3	0	POLYGON ((15.540344970743831 43.952883856404924, 15.540434680815906 43.95275570031538, 15.541101091941869 43.952396863624415, 15.542267312086835 43.952255892195694, 15.542908092534503 43.952089289189416, 15.543728291327625 43.95203802693345, 15.5442665463641 43.95182016167115, 15.544651014632677 43.95148695565854, 15.545663448009748 43.949295486797325, 15.546483646802926 43.947655089211025, 15.54…	Vransko Lake	Croatia	7	5748	biodiversity, flood control, water quality regulation, recreation, eco-tourism, research, livestock	burning, resource extraction, pollution	2007-09-08	Some red burning, illegal fhishing and peachers, illegal garbage disposal	320.2	8.26337
2019-02-07	2768.44	18	2	4	2	2	9	3	16	2723.18	173.027	2	0.00735294	2.25829	0	0	7.51286	vransko	29.4751	10.1882	3.58895	0.628821	0.181905	0.0244839	0	50.9659	4.9466	0	0.393025	0.00645738	5764.72	27936	4.84603	3	0	POLYGON ((15.540344970743831 43.952883856404924, 15.540434680815906 43.95275570031538, 15.541101091941869 43.952396863624415, 15.542267312086835 43.952255892195694, 15.542908092534503 43.952089289189416, 15.543728291327625 43.95203802693345, 15.5442665463641 43.95182016167115, 15.544651014632677 43.95148695565854, 15.545663448009748 43.949295486797325, 15.546483646802926 43.947655089211025, 15.54…	Vransko Lake	Croatia	7	5748	biodiversity, flood control, water quality regulation, recreation, eco-tourism, research, livestock	burning, resource extraction, pollution	2007-09-08	Some red burning, illegal fhishing and peachers, illegal garbage disposal	173.7	10.0312
2019-02-14	2878.41	15	8	3	6	3	4	2	11	2847.8	261.674	4	0.0659341	8.85009	0	0	9.05071	vransko	29.4751	10.1882	3.58895	0.628821	0.181905	0.0244839	0	50.9659	4.9466	0	0.393025	0.00645738	5764.72	27936	4.84603	3	0	POLYGON ((15.540344970743831 43.952883856404924, 15.540434680815906 43.95275570031538, 15.541101091941869 43.952396863624415, 15.542267312086835 43.952255892195694, 15.542908092534503 43.952089289189416, 15.543728291327625 43.95203802693345, 15.5442665463641 43.95182016167115, 15.544651014632677 43.95148695565854, 15.545663448009748 43.949295486797325, 15.546483646802926 43.947655089211025, 15.54…	Vransko Lake	Croatia	7	5748	biodiversity, flood control, water quality regulation, recreation, eco-tourism, research, livestock	burning, resource extraction, pollution	2007-09-08	Some red burning, illegal fhishing and peachers, illegal garbage disposal	227.1	8.27602
2019-02-19	2870.1	11	9	3	1	2	5	2	11	2835.9	260.918	0	0	0	0	0	8.47286	vransko	29.4751	10.1882	3.58895	0.628821	0.181905	0.0244839	0	50.9659	4.9466	0	0.393025	0.00645738	5764.72	27936	4.84603	3	0	POLYGON ((15.540344970743831 43.952883856404924, 15.540434680815906 43.95275570031538, 15.541101091941869 43.952396863624415, 15.542267312086835 43.952255892195694, 15.542908092534503 43.952089289189416, 15.543728291327625 43.95203802693345, 15.5442665463641 43.95182016167115, 15.544651014632677 43.95148695565854, 15.545663448009748 43.949295486797325, 15.546483646802926 43.947655089211025, 15.54…	Vransko Lake	Croatia	7	5748	biodiversity, flood control, water quality regulation, recreation, eco-tourism, research, livestock	burning, resource extraction, pollution	2007-09-08	Some red burning, illegal fhishing and peachers, illegal garbage disposal	0	8.17745
2019-02-26	2915.82	19	4	9	2	1	4	4	17	2833.73	171.519	2	0.00653595	2.44065	0	0	13.2414	vransko	29.4751	10.1882	3.58895	0.628821	0.181905	0.0244839	0	50.9659	4.9466	0	0.393025	0.00645738	5764.72	27936	4.84603	3	0	POLYGON ((15.540344970743831 43.952883856404924, 15.540434680815906 43.95275570031538, 15.541101091941869 43.952396863624415, 15.542267312086835 43.952255892195694, 15.542908092534503 43.952089289189416, 15.543728291327625 43.95203802693345, 15.5442665463641 43.95182016167115, 15.544651014632677 43.95148695565854, 15.545663448009748 43.949295486797325, 15.546483646802926 43.947655089211025, 15.54…	Vransko Lake	Croatia	7	5748	biodiversity, flood control, water quality regulation, recreation, eco-tourism, research, livestock	burning, resource extraction, pollution	2007-09-08	Some red burning, illegal fhishing and peachers, illegal garbage disposal	147.6	8.54316
2019-03-03	2885.46	18	7	4	1	3	7	6	18	2833.1	160.303	0	0	0	0	0	10.1971	vransko	29.4751	10.1882	3.58895	0.628821	0.181905	0.0244839	0	50.9659	4.9466	0	0.393025	0.00645738	5764.72	27936	4.84603	3	0	POLYGON ((15.540344970743831 43.952883856404924, 15.540434680815906 43.95275570031538, 15.541101091941869 43.952396863624415, 15.542267312086835 43.952255892195694, 15.542908092534503 43.952089289189416, 15.543728291327625 43.95203802693345, 15.5442665463641 43.95182016167115, 15.544651014632677 43.95148695565854, 15.545663448009748 43.949295486797325, 15.546483646802926 43.947655089211025, 15.54…	Vransko Lake	Croatia	7	5748	biodiversity, flood control, water quality regulation, recreation, eco-tourism, research, livestock	burning, resource extraction, pollution	2007-09-08	Some red burning, illegal fhishing and peachers, illegal garbage disposal	0	10.9866
2019-03-10	2924.6	10	5	2	3	1	1	4	9	2885.11	324.956	1	0	1.82925	0	0	12.3693	vransko	29.4751	10.1882	3.58895	0.628821	0.181905	0.0244839	0	50.9659	4.9466	0	0.393025	0.00645738	5764.72	27936	4.84603	3	0	POLYGON ((15.540344970743831 43.952883856404924, 15.540434680815906 43.95275570031538, 15.541101091941869 43.952396863624415, 15.542267312086835 43.952255892195694, 15.542908092534503 43.952089289189416, 15.543728291327625 43.95203802693345, 15.5442665463641 43.95182016167115, 15.544651014632677 43.95148695565854, 15.545663448009748 43.949295486797325, 15.546483646802926 43.947655089211025, 15.54…	Vransko Lake	Croatia	7	5748	biodiversity, flood control, water quality regulation, recreation, eco-tourism, research, livestock	burning, resource extraction, pollution	2007-09-08	Some red burning, illegal fhishing and peachers, illegal garbage disposal	0	12.6237
2019-03-15	2917.24	12	5	4	1	2	3	4	12	2877.62	243.103	0	0	0	0	0	11.7536	vransko	29.4751	10.1882	3.58895	0.628821	0.181905	0.0244839	0	50.9659	4.9466	0	0.393025	0.00645738	5764.72	27936	4.84603	3	0	POLYGON ((15.540344970743831 43.952883856404924, 15.540434680815906 43.95275570031538, 15.541101091941869 43.952396863624415, 15.542267312086835 43.952255892195694, 15.542908092534503 43.952089289189416, 15.543728291327625 43.95203802693345, 15.5442665463641 43.95182016167115, 15.544651014632677 43.95148695565854, 15.545663448009748 43.949295486797325, 15.546483646802926 43.947655089211025, 15.54…	Vransko Lake	Croatia	7	5748	biodiversity, flood control, water quality regulation, recreation, eco-tourism, research, livestock	burning, resource extraction, pollution	2007-09-08	Some red burning, illegal fhishing and peachers, illegal garbage disposal	122.5	10.4131
2019-03-22	2740.43	16	6	7	3	1	2	4	10	2714.54	274.043	6	0.180952	14.2735	0.172485	0	12.99	vransko	29.4751	10.1882	3.58895	0.628821	0.181905	0.0244839	0	50.9659	4.9466	0	0.393025	0.00645738	5764.72	27936	4.84603	3	0	POLYGON ((15.540344970743831 43.952883856404924, 15.540434680815906 43.95275570031538, 15.541101091941869 43.952396863624415, 15.542267312086835 43.952255892195694, 15.542908092534503 43.952089289189416, 15.543728291327625 43.95203802693345, 15.5442665463641 43.95182016167115, 15.544651014632677 43.95148695565854, 15.545663448009748 43.949295486797325, 15.546483646802926 43.947655089211025, 15.54…	Vransko Lake	Croatia	7	5748	biodiversity, flood control, water quality regulation, recreation, eco-tourism, research, livestock	burning, resource extraction, pollution	2007-09-08	Some red burning, illegal fhishing and peachers, illegal garbage disposal	514.2	11.356
2019-03-27	2902.6	22	11	2	2	2	13	5	20	2844.58	145.13	2	0	2.08794	0.5	14.1	10.2586	vransko	29.4751	10.1882	3.58895	0.628821	0.181905	0.0244839	0	50.9659	4.9466	0	0.393025	0.00645738	5764.72	27936	4.84603	3	0	POLYGON ((15.540344970743831 43.952883856404924, 15.540434680815906 43.95275570031538, 15.541101091941869 43.952396863624415, 15.542267312086835 43.952255892195694, 15.542908092534503 43.952089289189416, 15.543728291327625 43.95203802693345, 15.5442665463641 43.95182016167115, 15.544651014632677 43.95148695565854, 15.545663448009748 43.949295486797325, 15.546483646802926 43.947655089211025, 15.54…	Vransko Lake	Croatia	7	5748	biodiversity, flood control, water quality regulation, recreation, eco-tourism, research, livestock	burning, resource extraction, pollution	2007-09-08	Some red burning, illegal fhishing and peachers, illegal garbage disposal	14.1	12.3149
2019-04-03	2936.76	14	2	7	1	1	0	6	10	2910.66	293.676	4	0.0769231	10.2546	0	0	14.1171	vransko	29.4751	10.1882	3.58895	0.628821	0.181905	0.0244839	0	50.9659	4.9466	0	0.393025	0.00645738	5764.72	27936	4.84603	3	0	POLYGON ((15.540344970743831 43.952883856404924, 15.540434680815906 43.95275570031538, 15.541101091941869 43.952396863624415, 15.542267312086835 43.952255892195694, 15.542908092534503 43.952089289189416, 15.543728291327625 43.95203802693345, 15.5442665463641 43.95182016167115, 15.544651014632677 43.95148695565854, 15.545663448009748 43.949295486797325, 15.546483646802926 43.947655089211025, 15.54…	Vransko Lake	Croatia	7	5748	biodiversity, flood control, water quality regulation, recreation, eco-tourism, research, livestock	burning, resource extraction, pollution	2007-09-08	Some red burning, illegal fhishing and peachers, illegal garbage disposal	0	13.1817
2019-04-08	2924.37	13	8	2	1	1	6	4	13	2880.57	224.952	0	0	0	0	0	12.1071	vransko	29.4751	10.1882	3.58895	0.628821	0.181905	0.0244839	0	50.9659	4.9466	0	0.393025	0.00645738	5764.72	27936	4.84603	3	0	POLYGON ((15.540344970743831 43.952883856404924, 15.540434680815906 43.95275570031538, 15.541101091941869 43.952396863624415, 15.542267312086835 43.952255892195694, 15.542908092534503 43.952089289189416, 15.543728291327625 43.95203802693345, 15.5442665463641 43.95182016167115, 15.544651014632677 43.95148695565854, 15.545663448009748 43.949295486797325, 15.546483646802926 43.947655089211025, 15.54…	Vransko Lake	Croatia	7	5748	biodiversity, flood control, water quality regulation, recreation, eco-tourism, research, livestock	burning, resource extraction, pollution	2007-09-08	Some red burning, illegal fhishing and peachers, illegal garbage disposal	0	13.1099
2019-04-15	2994.43	8	3	1	1	1	1	5	7	2976.18	427.775	1	0	2.35099	0	2.1	13.74	vransko	29.4751	10.1882	3.58895	0.628821	0.181905	0.0244839	0	50.9659	4.9466	0	0.393025	0.00645738	5764.72	27936	4.84603	3	0	POLYGON ((15.540344970743831 43.952883856404924, 15.540434680815906 43.95275570031538, 15.541101091941869 43.952396863624415, 15.542267312086835 43.952255892195694, 15.542908092534503 43.952089289189416, 15.543728291327625 43.95203802693345, 15.5442665463641 43.95182016167115, 15.544651014632677 43.95148695565854, 15.545663448009748 43.949295486797325, 15.546483646802926 43.947655089211025, 15.54…	Vransko Lake	Croatia	7	5748	biodiversity, flood control, water quality regulation, recreation, eco-tourism, research, livestock	burning, resource extraction, pollution	2007-09-08	Some red burning, illegal fhishing and peachers, illegal garbage disposal	221.6	12.1263
2019-04-20	2838.82	22	2	8	1	1	8	5	19	2778.63	149.412	3	0.0142857	3.29337	0	0	16.3857	vransko	29.4751	10.1882	3.58895	0.628821	0.181905	0.0244839	0	50.9659	4.9466	0	0.393025	0.00645738	5764.72	27936	4.84603	3	0	POLYGON ((15.540344970743831 43.952883856404924, 15.540434680815906 43.95275570031538, 15.541101091941869 43.952396863624415, 15.542267312086835 43.952255892195694, 15.542908092534503 43.952089289189416, 15.543728291327625 43.95203802693345, 15.5442665463641 43.95182016167115, 15.544651014632677 43.95148695565854, 15.545663448009748 43.949295486797325, 15.546483646802926 43.947655089211025, 15.54…	Vransko Lake	Croatia	7	5748	biodiversity, flood control, water quality regulation, recreation, eco-tourism, research, livestock	burning, resource extraction, pollution	2007-09-08	Some red burning, illegal fhishing and peachers, illegal garbage disposal	69.4	14.2193
2019-04-27	2849.63	6	7	2	2	2	0	2	5	2833.34	569.927	1	0	3.29487	0	0	14.49	vransko	29.4751	10.1882	3.58895	0.628821	0.181905	0.0244839	0	50.9659	4.9466	0	0.393025	0.00645738	5764.72	27936	4.84603	3	0	POLYGON ((15.540344970743831 43.952883856404924, 15.540434680815906 43.95275570031538, 15.541101091941869 43.952396863624415, 15.542267312086835 43.952255892195694, 15.542908092534503 43.952089289189416, 15.543728291327625 43.95203802693345, 15.5442665463641 43.95182016167115, 15.544651014632677 43.95148695565854, 15.545663448009748 43.949295486797325, 15.546483646802926 43.947655089211025, 15.54…	Vransko Lake	Croatia	7	5748	biodiversity, flood control, water quality regulation, recreation, eco-tourism, research, livestock	burning, resource extraction, pollution	2007-09-08	Some red burning, illegal fhishing and peachers, illegal garbage disposal	139.1	16.7068
2019-05-02	2863.1	17	4	4	2	1	9	2	14	2822.12	204.507	3	0.025	5.19122	0	0	15.4336	vransko	29.4751	10.1882	3.58895	0.628821	0.181905	0.0244839	0	50.9659	4.9466	0	0.393025	0.00645738	5764.72	27936	4.84603	3	0	POLYGON ((15.540344970743831 43.952883856404924, 15.540434680815906 43.95275570031538, 15.541101091941869 43.952396863624415, 15.542267312086835 43.952255892195694, 15.542908092534503 43.952089289189416, 15.543728291327625 43.95203802693345, 15.5442665463641 43.95182016167115, 15.544651014632677 43.95148695565854, 15.545663448009748 43.949295486797325, 15.546483646802926 43.947655089211025, 15.54…	Vransko Lake	Croatia	7	5748	biodiversity, flood control, water quality regulation, recreation, eco-tourism, research, livestock	burning, resource extraction, pollution	2007-09-08	Some red burning, illegal fhishing and peachers, illegal garbage disposal	389.7	14.6976
2019-05-09	2874.97	9	7	1	1	1	3	4	8	2852.59	359.371	1	0	2.74045	0	0	13.28	vransko	29.4751	10.1882	3.58895	0.628821	0.181905	0.0244839	0	50.9659	4.9466	0	0.393025	0.00645738	5764.72	27936	4.84603	3	0	POLYGON ((15.540344970743831 43.952883856404924, 15.540434680815906 43.95275570031538, 15.541101091941869 43.952396863624415, 15.542267312086835 43.952255892195694, 15.542908092534503 43.952089289189416, 15.543728291327625 43.95203802693345, 15.5442665463641 43.95182016167115, 15.544651014632677 43.95148695565854, 15.545663448009748 43.949295486797325, 15.546483646802926 43.947655089211025, 15.54…	Vransko Lake	Croatia	7	5748	biodiversity, flood control, water quality regulation, recreation, eco-tourism, research, livestock	burning, resource extraction, pollution	2007-09-08	Some red burning, illegal fhishing and peachers, illegal garbage disposal	407.3	12.9311
2019-05-14	2727.03	26	2	0	1	0	19	6	26	2660.13	104.886	0	0	0	0	0	11.6579	vransko	29.4751	10.1882	3.58895	0.628821	0.181905	0.0244839	0	50.9659	4.9466	0	0.393025	0.00645738	5764.72	27936	4.84603	3	0	POLYGON ((15.540344970743831 43.952883856404924, 15.540434680815906 43.95275570031538, 15.541101091941869 43.952396863624415, 15.542267312086835 43.952255892195694, 15.542908092534503 43.952089289189416, 15.543728291327625 43.95203802693345, 15.5442665463641 43.95182016167115, 15.544651014632677 43.95148695565854, 15.545663448009748 43.949295486797325, 15.546483646802926 43.947655089211025, 15.54…	Vransko Lake	Croatia	7	5748	biodiversity, flood control, water quality regulation, recreation, eco-tourism, research, livestock	burning, resource extraction, pollution	2007-09-08	Some red burning, illegal fhishing and peachers, illegal garbage disposal	259.7	13.9842
2019-05-21	2843.01	3	0	0	0	0	0	3	3	2833.79	947.669	0	0	0	0	34.6	15.8314	vransko	29.4751	10.1882	3.58895	0.628821	0.181905	0.0244839	0	50.9659	4.9466	0	0.393025	0.00645738	5764.72	27936	4.84603	3	0	POLYGON ((15.540344970743831 43.952883856404924, 15.540434680815906 43.95275570031538, 15.541101091941869 43.952396863624415, 15.542267312086835 43.952255892195694, 15.542908092534503 43.952089289189416, 15.543728291327625 43.95203802693345, 15.5442665463641 43.95182016167115, 15.544651014632677 43.95148695565854, 15.545663448009748 43.949295486797325, 15.546483646802926 43.947655089211025, 15.54…	Vransko Lake	Croatia	7	5748	biodiversity, flood control, water quality regulation, recreation, eco-tourism, research, livestock	burning, resource extraction, pollution	2007-09-08	Some red burning, illegal fhishing and peachers, illegal garbage disposal	34.6	15.0001
2019-05-26	2775.98	18	0	2	0	1	14	2	18	2725.36	154.221	0	0	0	0	82.1	17.4	vransko	29.4751	10.1882	3.58895	0.628821	0.181905	0.0244839	0	50.9659	4.9466	0	0.393025	0.00645738	5764.72	27936	4.84603	3	0	POLYGON ((15.540344970743831 43.952883856404924, 15.540434680815906 43.95275570031538, 15.541101091941869 43.952396863624415, 15.542267312086835 43.952255892195694, 15.542908092534503 43.952089289189416, 15.543728291327625 43.95203802693345, 15.5442665463641 43.95182016167115, 15.544651014632677 43.95148695565854, 15.545663448009748 43.949295486797325, 15.546483646802926 43.947655089211025, 15.54…	Vransko Lake	Croatia	7	5748	biodiversity, flood control, water quality regulation, recreation, eco-tourism, research, livestock	burning, resource extraction, pollution	2007-09-08	Some red burning, illegal fhishing and peachers, illegal garbage disposal	533.2	17.2234
2019-06-02	2840.7	7	4	0	2	0	1	4	6	2825.18	473.45	1	0	3.65384	0	22.7	19.5657	vransko	29.4751	10.1882	3.58895	0.628821	0.181905	0.0244839	0	50.9659	4.9466	0	0.393025	0.00645738	5764.72	27936	4.84603	3	0	POLYGON ((15.540344970743831 43.952883856404924, 15.540434680815906 43.95275570031538, 15.541101091941869 43.952396863624415, 15.542267312086835 43.952255892195694, 15.542908092534503 43.952089289189416, 15.543728291327625 43.95203802693345, 15.5442665463641 43.95182016167115, 15.544651014632677 43.95148695565854, 15.545663448009748 43.949295486797325, 15.546483646802926 43.947655089211025, 15.54…	Vransko Lake	Croatia	7	5748	biodiversity, flood control, water quality regulation, recreation, eco-tourism, research, livestock	burning, resource extraction, pollution	2007-09-08	Some red burning, illegal fhishing and peachers, illegal garbage disposal	949.5	17.6309
2019-06-07	2870.11	13	2	1	1	1	7	4	12	2831.11	239.176	1	0	1.37134	0	0	22.1071	vransko	29.4751	10.1882	3.58895	0.628821	0.181905	0.0244839	0	50.9659	4.9466	0	0.393025	0.00645738	5764.72	27936	4.84603	3	0	POLYGON ((15.540344970743831 43.952883856404924, 15.540434680815906 43.95275570031538, 15.541101091941869 43.952396863624415, 15.542267312086835 43.952255892195694, 15.542908092534503 43.952089289189416, 15.543728291327625 43.95203802693345, 15.5442665463641 43.95182016167115, 15.544651014632677 43.95148695565854, 15.545663448009748 43.949295486797325, 15.546483646802926 43.947655089211025, 15.54…	Vransko Lake	Croatia	7	5748	biodiversity, flood control, water quality regulation, recreation, eco-tourism, research, livestock	burning, resource extraction, pollution	2007-09-08	Some red burning, illegal fhishing and peachers, illegal garbage disposal	84.4	20.5129
2019-06-14	2847.07	6	2	0	1	0	0	5	6	2826.99	474.512	0	0	0	0	0	25.3164	vransko	29.4751	10.1882	3.58895	0.628821	0.181905	0.0244839	0	50.9659	4.9466	0	0.393025	0.00645738	5764.72	27936	4.84603	3	0	POLYGON ((15.540344970743831 43.952883856404924, 15.540434680815906 43.95275570031538, 15.541101091941869 43.952396863624415, 15.542267312086835 43.952255892195694, 15.542908092534503 43.952089289189416, 15.543728291327625 43.95203802693345, 15.5442665463641 43.95182016167115, 15.544651014632677 43.95148695565854, 15.545663448009748 43.949295486797325, 15.546483646802926 43.947655089211025, 15.54…	Vransko Lake	Croatia	7	5748	biodiversity, flood control, water quality regulation, recreation, eco-tourism, research, livestock	burning, resource extraction, pollution	2007-09-08	Some red burning, illegal fhishing and peachers, illegal garbage disposal	0	25.1314
2019-06-19	2874.75	23	0	2	0	1	16	5	22	2810.13	130.671	1	0	0.996509	0	0	25.0057	vransko	29.4751	10.1882	3.58895	0.628821	0.181905	0.0244839	0	50.9659	4.9466	0	0.393025	0.00645738	5764.72	27936	4.84603	3	0	POLYGON ((15.540344970743831 43.952883856404924, 15.540434680815906 43.95275570031538, 15.541101091941869 43.952396863624415, 15.542267312086835 43.952255892195694, 15.542908092534503 43.952089289189416, 15.543728291327625 43.95203802693345, 15.5442665463641 43.95182016167115, 15.544651014632677 43.95148695565854, 15.545663448009748 43.949295486797325, 15.546483646802926 43.947655089211025, 15.54…	Vransko Lake	Croatia	7	5748	biodiversity, flood control, water quality regulation, recreation, eco-tourism, research, livestock	burning, resource extraction, pollution	2007-09-08	Some red burning, illegal fhishing and peachers, illegal garbage disposal	0	25.2409
2019-06-26	2618.63	11	4	5	3	4	0	3	10	2593.19	261.863	1	0	1.64534	0	0	28.3979	vransko	29.4751	10.1882	3.58895	0.628821	0.181905	0.0244839	0	50.9659	4.9466	0	0.393025	0.00645738	5764.72	27936	4.84603	3	0	POLYGON ((15.540344970743831 43.952883856404924, 15.540434680815906 43.95275570031538, 15.541101091941869 43.952396863624415, 15.542267312086835 43.952255892195694, 15.542908092534503 43.952089289189416, 15.543728291327625 43.95203802693345, 15.5442665463641 43.95182016167115, 15.544651014632677 43.95148695565854, 15.545663448009748 43.949295486797325, 15.546483646802926 43.947655089211025, 15.54…	Vransko Lake	Croatia	7	5748	biodiversity, flood control, water quality regulation, recreation, eco-tourism, research, livestock	burning, resource extraction, pollution	2007-09-08	Some red burning, illegal fhishing and peachers, illegal garbage disposal	88.8	25.7404
2019-07-01	2813.53	24	4	1	2	1	16	5	24	2746.23	117.231	0	0	0	0	0	27.1321	vransko	29.4751	10.1882	3.58895	0.628821	0.181905	0.0244839	0	50.9659	4.9466	0	0.393025	0.00645738	5764.72	27936	4.84603	3	0	POLYGON ((15.540344970743831 43.952883856404924, 15.540434680815906 43.95275570031538, 15.541101091941869 43.952396863624415, 15.542267312086835 43.952255892195694, 15.542908092534503 43.952089289189416, 15.543728291327625 43.95203802693345, 15.5442665463641 43.95182016167115, 15.544651014632677 43.95148695565854, 15.545663448009748 43.949295486797325, 15.546483646802926 43.947655089211025, 15.54…	Vransko Lake	Croatia	7	5748	biodiversity, flood control, water quality regulation, recreation, eco-tourism, research, livestock	burning, resource extraction, pollution	2007-09-08	Some red burning, illegal fhishing and peachers, illegal garbage disposal	0	27.5706
2019-07-08	2823.09	8	2	1	1	1	1	5	8	2802.35	352.886	0	0	0	0	0	25.7379	vransko	29.4751	10.1882	3.58895	0.628821	0.181905	0.0244839	0	50.9659	4.9466	0	0.393025	0.00645738	5764.72	27936	4.84603	3	0	POLYGON ((15.540344970743831 43.952883856404924, 15.540434680815906 43.95275570031538, 15.541101091941869 43.952396863624415, 15.542267312086835 43.952255892195694, 15.542908092534503 43.952089289189416, 15.543728291327625 43.95203802693345, 15.5442665463641 43.95182016167115, 15.544651014632677 43.95148695565854, 15.545663448009748 43.949295486797325, 15.546483646802926 43.947655089211025, 15.54…	Vransko Lake	Croatia	7	5748	biodiversity, flood control, water quality regulation, recreation, eco-tourism, research, livestock	burning, resource extraction, pollution	2007-09-08	Some red burning, illegal fhishing and peachers, illegal garbage disposal	0	26.8405
2019-07-13	2776.45	15	2	0	1	0	9	5	15	2729.31	185.097	0	0	0	0	0	21.1036	vransko	29.4751	10.1882	3.58895	0.628821	0.181905	0.0244839	0	50.9659	4.9466	0	0.393025	0.00645738	5764.72	27936	4.84603	3	0	POLYGON ((15.540344970743831 43.952883856404924, 15.540434680815906 43.95275570031538, 15.541101091941869 43.952396863624415, 15.542267312086835 43.952255892195694, 15.542908092534503 43.952089289189416, 15.543728291327625 43.95203802693345, 15.5442665463641 43.95182016167115, 15.544651014632677 43.95148695565854, 15.545663448009748 43.949295486797325, 15.546483646802926 43.947655089211025, 15.54…	Vransko Lake	Croatia	7	5748	biodiversity, flood control, water quality regulation, recreation, eco-tourism, research, livestock	burning, resource extraction, pollution	2007-09-08	Some red burning, illegal fhishing and peachers, illegal garbage disposal	463.2	23.3756
2019-07-20	2840.63	8	0	2	0	1	0	6	8	2820.35	355.079	0	0	0	0	0	25.1336	vransko	29.4751	10.1882	3.58895	0.628821	0.181905	0.0244839	0	50.9659	4.9466	0	0.393025	0.00645738	5764.72	27936	4.84603	3	0	POLYGON ((15.540344970743831 43.952883856404924, 15.540434680815906 43.95275570031538, 15.541101091941869 43.952396863624415, 15.542267312086835 43.952255892195694, 15.542908092534503 43.952089289189416, 15.543728291327625 43.95203802693345, 15.5442665463641 43.95182016167115, 15.544651014632677 43.95148695565854, 15.545663448009748 43.949295486797325, 15.546483646802926 43.947655089211025, 15.54…	Vransko Lake	Croatia	7	5748	biodiversity, flood control, water quality regulation, recreation, eco-tourism, research, livestock	burning, resource extraction, pollution	2007-09-08	Some red burning, illegal fhishing and peachers, illegal garbage disposal	63.5	23.8019
2019-07-25	2823.36	24	2	0	1	0	17	6	24	2751.87	117.64	0	0	0	0	0	27.8957	vransko	29.4751	10.1882	3.58895	0.628821	0.181905	0.0244839	0	50.9659	4.9466	0	0.393025	0.00645738	5764.72	27936	4.84603	3	0	POLYGON ((15.540344970743831 43.952883856404924, 15.540434680815906 43.95275570031538, 15.541101091941869 43.952396863624415, 15.542267312086835 43.952255892195694, 15.542908092534503 43.952089289189416, 15.543728291327625 43.95203802693345, 15.5442665463641 43.95182016167115, 15.544651014632677 43.95148695565854, 15.545663448009748 43.949295486797325, 15.546483646802926 43.947655089211025, 15.54…	Vransko Lake	Croatia	7	5748	biodiversity, flood control, water quality regulation, recreation, eco-tourism, research, livestock	burning, resource extraction, pollution	2007-09-08	Some red burning, illegal fhishing and peachers, illegal garbage disposal	0	26.5701
2019-08-01	2816.25	6	0	0	0	0	0	6	6	2797.38	469.374	0	0	0	0	0	26.3507	vransko	29.4751	10.1882	3.58895	0.628821	0.181905	0.0244839	0	50.9659	4.9466	0	0.393025	0.00645738	5764.72	27936	4.84603	3	0	POLYGON ((15.540344970743831 43.952883856404924, 15.540434680815906 43.95275570031538, 15.541101091941869 43.952396863624415, 15.542267312086835 43.952255892195694, 15.542908092534503 43.952089289189416, 15.543728291327625 43.95203802693345, 15.5442665463641 43.95182016167115, 15.544651014632677 43.95148695565854, 15.545663448009748 43.949295486797325, 15.546483646802926 43.947655089211025, 15.54…	Vransko Lake	Croatia	7	5748	biodiversity, flood control, water quality regulation, recreation, eco-tourism, research, livestock	burning, resource extraction, pollution	2007-09-08	Some red burning, illegal fhishing and peachers, illegal garbage disposal	501.9	25.5985
2019-08-06	2653.75	19	0	5	0	1	9	5	17	2596.25	156.103	2	0.00653595	2.4411	0	0	25.5364	vransko	29.4751	10.1882	3.58895	0.628821	0.181905	0.0244839	0	50.9659	4.9466	0	0.393025	0.00645738	5764.72	27936	4.84603	3	0	POLYGON ((15.540344970743831 43.952883856404924, 15.540434680815906 43.95275570031538, 15.541101091941869 43.952396863624415, 15.542267312086835 43.952255892195694, 15.542908092534503 43.952089289189416, 15.543728291327625 43.95203802693345, 15.5442665463641 43.95182016167115, 15.544651014632677 43.95148695565854, 15.545663448009748 43.949295486797325, 15.546483646802926 43.947655089211025, 15.54…	Vransko Lake	Croatia	7	5748	biodiversity, flood control, water quality regulation, recreation, eco-tourism, research, livestock	burning, resource extraction, pollution	2007-09-08	Some red burning, illegal fhishing and peachers, illegal garbage disposal	250	24.8795
2019-08-13	2823.44	5	5	0	1	0	0	4	5	2810.58	564.688	0	0	0	0	479.2	27.4607	vransko	29.4751	10.1882	3.58895	0.628821	0.181905	0.0244839	0	50.9659	4.9466	0	0.393025	0.00645738	5764.72	27936	4.84603	3	0	POLYGON ((15.540344970743831 43.952883856404924, 15.540434680815906 43.95275570031538, 15.541101091941869 43.952396863624415, 15.542267312086835 43.952255892195694, 15.542908092534503 43.952089289189416, 15.543728291327625 43.95203802693345, 15.5442665463641 43.95182016167115, 15.544651014632677 43.95148695565854, 15.545663448009748 43.949295486797325, 15.546483646802926 43.947655089211025, 15.54…	Vransko Lake	Croatia	7	5748	biodiversity, flood control, water quality regulation, recreation, eco-tourism, research, livestock	burning, resource extraction, pollution	2007-09-08	Some red burning, illegal fhishing and peachers, illegal garbage disposal	479.2	27.3172
2019-08-18	2823.79	18	0	2	0	1	12	4	18	2769.26	156.877	0	0	0	0	0	24.4829	vransko	29.4751	10.1882	3.58895	0.628821	0.181905	0.0244839	0	50.9659	4.9466	0	0.393025	0.00645738	5764.72	27936	4.84603	3	0	POLYGON ((15.540344970743831 43.952883856404924, 15.540434680815906 43.95275570031538, 15.541101091941869 43.952396863624415, 15.542267312086835 43.952255892195694, 15.542908092534503 43.952089289189416, 15.543728291327625 43.95203802693345, 15.5442665463641 43.95182016167115, 15.544651014632677 43.95148695565854, 15.545663448009748 43.949295486797325, 15.546483646802926 43.947655089211025, 15.54…	Vransko Lake	Croatia	7	5748	biodiversity, flood control, water quality regulation, recreation, eco-tourism, research, livestock	burning, resource extraction, pollution	2007-09-08	Some red burning, illegal fhishing and peachers, illegal garbage disposal	535.5	24.9476
2019-08-25	2820.56	10	4	4	2	3	0	4	10	2793.5	282.056	0	0	0	0	0	25.405	vransko	29.4751	10.1882	3.58895	0.628821	0.181905	0.0244839	0	50.9659	4.9466	0	0.393025	0.00645738	5764.72	27936	4.84603	3	0	POLYGON ((15.540344970743831 43.952883856404924, 15.540434680815906 43.95275570031538, 15.541101091941869 43.952396863624415, 15.542267312086835 43.952255892195694, 15.542908092534503 43.952089289189416, 15.543728291327625 43.95203802693345, 15.5442665463641 43.95182016167115, 15.544651014632677 43.95148695565854, 15.545663448009748 43.949295486797325, 15.546483646802926 43.947655089211025, 15.54…	Vransko Lake	Croatia	7	5748	biodiversity, flood control, water quality regulation, recreation, eco-tourism, research, livestock	burning, resource extraction, pollution	2007-09-08	Some red burning, illegal fhishing and peachers, illegal garbage disposal	24.7	26.067
2019-08-30	2629.1	26	6	9	3	3	10	4	19	2573.41	138.374	8	0.0466667	9.31668	0.28127	0	26.4436	vransko	29.4751	10.1882	3.58895	0.628821	0.181905	0.0244839	0	50.9659	4.9466	0	0.393025	0.00645738	5764.72	27936	4.84603	3	0	POLYGON ((15.540344970743831 43.952883856404924, 15.540434680815906 43.95275570031538, 15.541101091941869 43.952396863624415, 15.542267312086835 43.952255892195694, 15.542908092534503 43.952089289189416, 15.543728291327625 43.95203802693345, 15.5442665463641 43.95182016167115, 15.544651014632677 43.95148695565854, 15.545663448009748 43.949295486797325, 15.546483646802926 43.947655089211025, 15.54…	Vransko Lake	Croatia	7	5748	biodiversity, flood control, water quality regulation, recreation, eco-tourism, research, livestock	burning, resource extraction, pollution	2007-09-08	Some red burning, illegal fhishing and peachers, illegal garbage disposal	24.7	25.8708
2019-09-06	2500.13	15	11	5	6	4	1	3	8	2475.4	312.516	8	0.21978	20.8751	0.0912789	1.8	22.4043	vransko	29.4751	10.1882	3.58895	0.628821	0.181905	0.0244839	0	50.9659	4.9466	0	0.393025	0.00645738	5764.72	27936	4.84603	3	0	POLYGON ((15.540344970743831 43.952883856404924, 15.540434680815906 43.95275570031538, 15.541101091941869 43.952396863624415, 15.542267312086835 43.952255892195694, 15.542908092534503 43.952089289189416, 15.543728291327625 43.95203802693345, 15.5442665463641 43.95182016167115, 15.544651014632677 43.95148695565854, 15.545663448009748 43.949295486797325, 15.546483646802926 43.947655089211025, 15.54…	Vransko Lake	Croatia	7	5748	biodiversity, flood control, water quality regulation, recreation, eco-tourism, research, livestock	burning, resource extraction, pollution	2007-09-08	Some red burning, illegal fhishing and peachers, illegal garbage disposal	70.5	23.7984
2019-09-11	2649.38	17	12	1	3	2	10	3	16	2589.46	165.586	1	0	1.0292	0	0	21.6686	vransko	29.4751	10.1882	3.58895	0.628821	0.181905	0.0244839	0	50.9659	4.9466	0	0.393025	0.00645738	5764.72	27936	4.84603	3	0	POLYGON ((15.540344970743831 43.952883856404924, 15.540434680815906 43.95275570031538, 15.541101091941869 43.952396863624415, 15.542267312086835 43.952255892195694, 15.542908092534503 43.952089289189416, 15.543728291327625 43.95203802693345, 15.5442665463641 43.95182016167115, 15.544651014632677 43.95148695565854, 15.545663448009748 43.949295486797325, 15.546483646802926 43.947655089211025, 15.54…	Vransko Lake	Croatia	7	5748	biodiversity, flood control, water quality regulation, recreation, eco-tourism, research, livestock	burning, resource extraction, pollution	2007-09-08	Some red burning, illegal fhishing and peachers, illegal garbage disposal	157.1	21.4086
2019-09-18	2839.14	8	3	5	1	3	0	2	7	2821.2	405.591	1	0	2.35054	0	56.3	21.7264	vransko	29.4751	10.1882	3.58895	0.628821	0.181905	0.0244839	0	50.9659	4.9466	0	0.393025	0.00645738	5764.72	27936	4.84603	3	0	POLYGON ((15.540344970743831 43.952883856404924, 15.540434680815906 43.95275570031538, 15.541101091941869 43.952396863624415, 15.542267312086835 43.952255892195694, 15.542908092534503 43.952089289189416, 15.543728291327625 43.95203802693345, 15.5442665463641 43.95182016167115, 15.544651014632677 43.95148695565854, 15.545663448009748 43.949295486797325, 15.546483646802926 43.947655089211025, 15.54…	Vransko Lake	Croatia	7	5748	biodiversity, flood control, water quality regulation, recreation, eco-tourism, research, livestock	burning, resource extraction, pollution	2007-09-08	Some red burning, illegal fhishing and peachers, illegal garbage disposal	162.3	22.1524
2019-09-23	2872.26	20	6	1	3	1	14	2	20	2807.44	143.613	0	0	0	0	137.6	19.3764	vransko	29.4751	10.1882	3.58895	0.628821	0.181905	0.0244839	0	50.9659	4.9466	0	0.393025	0.00645738	5764.72	27936	4.84603	3	0	POLYGON ((15.540344970743831 43.952883856404924, 15.540434680815906 43.95275570031538, 15.541101091941869 43.952396863624415, 15.542267312086835 43.952255892195694, 15.542908092534503 43.952089289189416, 15.543728291327625 43.95203802693345, 15.5442665463641 43.95182016167115, 15.544651014632677 43.95148695565854, 15.545663448009748 43.949295486797325, 15.546483646802926 43.947655089211025, 15.54…	Vransko Lake	Croatia	7	5748	biodiversity, flood control, water quality regulation, recreation, eco-tourism, research, livestock	burning, resource extraction, pollution	2007-09-08	Some red burning, illegal fhishing and peachers, illegal garbage disposal	304.4	19.0461
2019-09-30	2829.49	6	0	2	0	1	0	4	6	2813.05	471.581	0	0	0	0	0	20.9579	vransko	29.4751	10.1882	3.58895	0.628821	0.181905	0.0244839	0	50.9659	4.9466	0	0.393025	0.00645738	5764.72	27936	4.84603	3	0	POLYGON ((15.540344970743831 43.952883856404924, 15.540434680815906 43.95275570031538, 15.541101091941869 43.952396863624415, 15.542267312086835 43.952255892195694, 15.542908092534503 43.952089289189416, 15.543728291327625 43.95203802693345, 15.5442665463641 43.95182016167115, 15.544651014632677 43.95148695565854, 15.545663448009748 43.949295486797325, 15.546483646802926 43.947655089211025, 15.54…	Vransko Lake	Croatia	7	5748	biodiversity, flood control, water quality regulation, recreation, eco-tourism, research, livestock	burning, resource extraction, pollution	2007-09-08	Some red burning, illegal fhishing and peachers, illegal garbage disposal	233.8	19.5142
2019-10-05	2806.02	9	4	0	2	0	5	2	9	2771.17	311.78	0	0	0	0	0	15.1607	vransko	29.4751	10.1882	3.58895	0.628821	0.181905	0.0244839	0	50.9659	4.9466	0	0.393025	0.00645738	5764.72	27936	4.84603	3	0	POLYGON ((15.540344970743831 43.952883856404924, 15.540434680815906 43.95275570031538, 15.541101091941869 43.952396863624415, 15.542267312086835 43.952255892195694, 15.542908092534503 43.952089289189416, 15.543728291327625 43.95203802693345, 15.5442665463641 43.95182016167115, 15.544651014632677 43.95148695565854, 15.545663448009748 43.949295486797325, 15.546483646802926 43.947655089211025, 15.54…	Vransko Lake	Croatia	7	5748	biodiversity, flood control, water quality regulation, recreation, eco-tourism, research, livestock	burning, resource extraction, pollution	2007-09-08	Some red burning, illegal fhishing and peachers, illegal garbage disposal	47.9	17.6704
2019-10-12	2830.09	6	0	2	0	1	1	3	6	2815.98	471.681	0	0	0	0	0	16.615	vransko	29.4751	10.1882	3.58895	0.628821	0.181905	0.0244839	0	50.9659	4.9466	0	0.393025	0.00645738	5764.72	27936	4.84603	3	0	POLYGON ((15.540344970743831 43.952883856404924, 15.540434680815906 43.95275570031538, 15.541101091941869 43.952396863624415, 15.542267312086835 43.952255892195694, 15.542908092534503 43.952089289189416, 15.543728291327625 43.95203802693345, 15.5442665463641 43.95182016167115, 15.544651014632677 43.95148695565854, 15.545663448009748 43.949295486797325, 15.546483646802926 43.947655089211025, 15.54…	Vransko Lake	Croatia	7	5748	biodiversity, flood control, water quality regulation, recreation, eco-tourism, research, livestock	burning, resource extraction, pollution	2007-09-08	Some red burning, illegal fhishing and peachers, illegal garbage disposal	31	16.3457
2019-10-17	2728.46	13	2	1	1	1	7	4	13	2686.87	209.882	0	0	0	0	0	16.545	vransko	29.4751	10.1882	3.58895	0.628821	0.181905	0.0244839	0	50.9659	4.9466	0	0.393025	0.00645738	5764.72	27936	4.84603	3	0	POLYGON ((15.540344970743831 43.952883856404924, 15.540434680815906 43.95275570031538, 15.541101091941869 43.952396863624415, 15.542267312086835 43.952255892195694, 15.542908092534503 43.952089289189416, 15.543728291327625 43.95203802693345, 15.5442665463641 43.95182016167115, 15.544651014632677 43.95148695565854, 15.545663448009748 43.949295486797325, 15.546483646802926 43.947655089211025, 15.54…	Vransko Lake	Croatia	7	5748	biodiversity, flood control, water quality regulation, recreation, eco-tourism, research, livestock	burning, resource extraction, pollution	2007-09-08	Some red burning, illegal fhishing and peachers, illegal garbage disposal	22	16.9761
2019-10-24	2837.02	9	2	3	1	1	0	5	8	2816.82	354.627	1	0	2.74044	0	0	17.1636	vransko	29.4751	10.1882	3.58895	0.628821	0.181905	0.0244839	0	50.9659	4.9466	0	0.393025	0.00645738	5764.72	27936	4.84603	3	0	POLYGON ((15.540344970743831 43.952883856404924, 15.540434680815906 43.95275570031538, 15.541101091941869 43.952396863624415, 15.542267312086835 43.952255892195694, 15.542908092534503 43.952089289189416, 15.543728291327625 43.95203802693345, 15.5442665463641 43.95182016167115, 15.544651014632677 43.95148695565854, 15.545663448009748 43.949295486797325, 15.546483646802926 43.947655089211025, 15.54…	Vransko Lake	Croatia	7	5748	biodiversity, flood control, water quality regulation, recreation, eco-tourism, research, livestock	burning, resource extraction, pollution	2007-09-08	Some red burning, illegal fhishing and peachers, illegal garbage disposal	0	17.3527
2019-10-29	2829.34	17	3	4	1	2	8	4	14	2790.16	202.096	3	0.00833333	3.77137	0.396945	146.2	16.2336	vransko	29.4751	10.1882	3.58895	0.628821	0.181905	0.0244839	0	50.9659	4.9466	0	0.393025	0.00645738	5764.72	27936	4.84603	3	0	POLYGON ((15.540344970743831 43.952883856404924, 15.540434680815906 43.95275570031538, 15.541101091941869 43.952396863624415, 15.542267312086835 43.952255892195694, 15.542908092534503 43.952089289189416, 15.543728291327625 43.95203802693345, 15.5442665463641 43.95182016167115, 15.544651014632677 43.95148695565854, 15.545663448009748 43.949295486797325, 15.546483646802926 43.947655089211025, 15.54…	Vransko Lake	Croatia	7	5748	biodiversity, flood control, water quality regulation, recreation, eco-tourism, research, livestock	burning, resource extraction, pollution	2007-09-08	Some red burning, illegal fhishing and peachers, illegal garbage disposal	173.2	16.5706
2019-11-05	2855.95	9	5	2	2	1	2	3	9	2833.31	317.328	0	0	0	0	132.7	19.0657	vransko	29.4751	10.1882	3.58895	0.628821	0.181905	0.0244839	0	50.9659	4.9466	0	0.393025	0.00645738	5764.72	27936	4.84603	3	0	POLYGON ((15.540344970743831 43.952883856404924, 15.540434680815906 43.95275570031538, 15.541101091941869 43.952396863624415, 15.542267312086835 43.952255892195694, 15.542908092534503 43.952089289189416, 15.543728291327625 43.95203802693345, 15.5442665463641 43.95182016167115, 15.544651014632677 43.95148695565854, 15.545663448009748 43.949295486797325, 15.546483646802926 43.947655089211025, 15.54…	Vransko Lake	Croatia	7	5748	biodiversity, flood control, water quality regulation, recreation, eco-tourism, research, livestock	burning, resource extraction, pollution	2007-09-08	Some red burning, illegal fhishing and peachers, illegal garbage disposal	524.5	15.6515
2019-11-10	2833.79	9	3	0	1	0	3	5	9	2799.35	314.866	0	0	0	0	33	11.6971	vransko	29.4751	10.1882	3.58895	0.628821	0.181905	0.0244839	0	50.9659	4.9466	0	0.393025	0.00645738	5764.72	27936	4.84603	3	0	POLYGON ((15.540344970743831 43.952883856404924, 15.540434680815906 43.95275570031538, 15.541101091941869 43.952396863624415, 15.542267312086835 43.952255892195694, 15.542908092534503 43.952089289189416, 15.543728291327625 43.95203802693345, 15.5442665463641 43.95182016167115, 15.544651014632677 43.95148695565854, 15.545663448009748 43.949295486797325, 15.546483646802926 43.947655089211025, 15.54…	Vransko Lake	Croatia	7	5748	biodiversity, flood control, water quality regulation, recreation, eco-tourism, research, livestock	burning, resource extraction, pollution	2007-09-08	Some red burning, illegal fhishing and peachers, illegal garbage disposal	317.4	14.852
2019-11-17	2819.9	7	0	0	0	0	1	6	7	2792.86	402.843	0	0	0	0	1.8	16.35	vransko	29.4751	10.1882	3.58895	0.628821	0.181905	0.0244839	0	50.9659	4.9466	0	0.393025	0.00645738	5764.72	27936	4.84603	3	0	POLYGON ((15.540344970743831 43.952883856404924, 15.540434680815906 43.95275570031538, 15.541101091941869 43.952396863624415, 15.542267312086835 43.952255892195694, 15.542908092534503 43.952089289189416, 15.543728291327625 43.95203802693345, 15.5442665463641 43.95182016167115, 15.544651014632677 43.95148695565854, 15.545663448009748 43.949295486797325, 15.546483646802926 43.947655089211025, 15.54…	Vransko Lake	Croatia	7	5748	biodiversity, flood control, water quality regulation, recreation, eco-tourism, research, livestock	burning, resource extraction, pollution	2007-09-08	Some red burning, illegal fhishing and peachers, illegal garbage disposal	302.7	15.0498
2019-11-22	2814.98	14	0	2	0	1	7	5	14	2772.53	201.07	0	0	0	0	0	12.925	vransko	29.4751	10.1882	3.58895	0.628821	0.181905	0.0244839	0	50.9659	4.9466	0	0.393025	0.00645738	5764.72	27936	4.84603	3	0	POLYGON ((15.540344970743831 43.952883856404924, 15.540434680815906 43.95275570031538, 15.541101091941869 43.952396863624415, 15.542267312086835 43.952255892195694, 15.542908092534503 43.952089289189416, 15.543728291327625 43.95203802693345, 15.5442665463641 43.95182016167115, 15.544651014632677 43.95148695565854, 15.545663448009748 43.949295486797325, 15.546483646802926 43.947655089211025, 15.54…	Vransko Lake	Croatia	7	5748	biodiversity, flood control, water quality regulation, recreation, eco-tourism, research, livestock	burning, resource extraction, pollution	2007-09-08	Some red burning, illegal fhishing and peachers, illegal garbage disposal	108.8	13.9755
2019-11-29	2914.87	7	0	4	0	1	0	3	5	2890.61	582.973	2	0.0666667	7.32003	0	181.3	12.9493	vransko	29.4751	10.1882	3.58895	0.628821	0.181905	0.0244839	0	50.9659	4.9466	0	0.393025	0.00645738	5764.72	27936	4.84603	3	0	POLYGON ((15.540344970743831 43.952883856404924, 15.540434680815906 43.95275570031538, 15.541101091941869 43.952396863624415, 15.542267312086835 43.952255892195694, 15.542908092534503 43.952089289189416, 15.543728291327625 43.95203802693345, 15.5442665463641 43.95182016167115, 15.544651014632677 43.95148695565854, 15.545663448009748 43.949295486797325, 15.546483646802926 43.947655089211025, 15.54…	Vransko Lake	Croatia	7	5748	biodiversity, flood control, water quality regulation, recreation, eco-tourism, research, livestock	burning, resource extraction, pollution	2007-09-08	Some red burning, illegal fhishing and peachers, illegal garbage disposal	266.6	13.8577
2019-12-04	2867.45	12	4	1	1	1	7	3	10	2835.84	286.745	2	0.0181818	3.49016	0	0	5.17286	vransko	29.4751	10.1882	3.58895	0.628821	0.181905	0.0244839	0	50.9659	4.9466	0	0.393025	0.00645738	5764.72	27936	4.84603	3	0	POLYGON ((15.540344970743831 43.952883856404924, 15.540434680815906 43.95275570031538, 15.541101091941869 43.952396863624415, 15.542267312086835 43.952255892195694, 15.542908092534503 43.952089289189416, 15.543728291327625 43.95203802693345, 15.5442665463641 43.95182016167115, 15.544651014632677 43.95148695565854, 15.545663448009748 43.949295486797325, 15.546483646802926 43.947655089211025, 15.54…	Vransko Lake	Croatia	7	5748	biodiversity, flood control, water quality regulation, recreation, eco-tourism, research, livestock	burning, resource extraction, pollution	2007-09-08	Some red burning, illegal fhishing and peachers, illegal garbage disposal	307.2	10.087
2019-12-11	2664.97	21	3	14	3	3	1	3	16	2621.79	166.561	5	0.0315789	6.60306	0.332345	0	6.94429	vransko	29.4751	10.1882	3.58895	0.628821	0.181905	0.0244839	0	50.9659	4.9466	0	0.393025	0.00645738	5764.72	27936	4.84603	3	0	POLYGON ((15.540344970743831 43.952883856404924, 15.540434680815906 43.95275570031538, 15.541101091941869 43.952396863624415, 15.542267312086835 43.952255892195694, 15.542908092534503 43.952089289189416, 15.543728291327625 43.95203802693345, 15.5442665463641 43.95182016167115, 15.544651014632677 43.95148695565854, 15.545663448009748 43.949295486797325, 15.546483646802926 43.947655089211025, 15.54…	Vransko Lake	Croatia	7	5748	biodiversity, flood control, water quality regulation, recreation, eco-tourism, research, livestock	burning, resource extraction, pollution	2007-09-08	Some red burning, illegal fhishing and peachers, illegal garbage disposal	131.7	9.34622
2019-12-16	2945.54	11	17	0	1	0	7	3	11	2915.15	267.776	0	0	0	0	0	13.8407	vransko	29.4751	10.1882	3.58895	0.628821	0.181905	0.0244839	0	50.9659	4.9466	0	0.393025	0.00645738	5764.72	27936	4.84603	3	0	POLYGON ((15.540344970743831 43.952883856404924, 15.540434680815906 43.95275570031538, 15.541101091941869 43.952396863624415, 15.542267312086835 43.952255892195694, 15.542908092534503 43.952089289189416, 15.543728291327625 43.95203802693345, 15.5442665463641 43.95182016167115, 15.544651014632677 43.95148695565854, 15.545663448009748 43.949295486797325, 15.546483646802926 43.947655089211025, 15.54…	Vransko Lake	Croatia	7	5748	biodiversity, flood control, water quality regulation, recreation, eco-tourism, research, livestock	burning, resource extraction, pollution	2007-09-08	Some red burning, illegal fhishing and peachers, illegal garbage disposal	85.7	9.15
2019-12-23	2961.47	10	0	7	0	1	1	2	9	2923.85	329.053	1	0	2.43593	0	0	11.3214	vransko	29.4751	10.1882	3.58895	0.628821	0.181905	0.0244839	0	50.9659	4.9466	0	0.393025	0.00645738	5764.72	27936	4.84603	3	0	POLYGON ((15.540344970743831 43.952883856404924, 15.540434680815906 43.95275570031538, 15.541101091941869 43.952396863624415, 15.542267312086835 43.952255892195694, 15.542908092534503 43.952089289189416, 15.543728291327625 43.95203802693345, 15.5442665463641 43.95182016167115, 15.544651014632677 43.95148695565854, 15.545663448009748 43.949295486797325, 15.546483646802926 43.947655089211025, 15.54…	Vransko Lake	Croatia	7	5748	biodiversity, flood control, water quality regulation, recreation, eco-tourism, research, livestock	burning, resource extraction, pollution	2007-09-08	Some red burning, illegal fhishing and peachers, illegal garbage disposal	722	13.7034
2019-12-28	2978.29	14	6	1	1	1	10	2	14	2941.05	212.735	0	0	0	0	70	5.49143	vransko	29.4751	10.1882	3.58895	0.628821	0.181905	0.0244839	0	50.9659	4.9466	0	0.393025	0.00645738	5764.72	27936	4.84603	3	0	POLYGON ((15.540344970743831 43.952883856404924, 15.540434680815906 43.95275570031538, 15.541101091941869 43.952396863624415, 15.542267312086835 43.952255892195694, 15.542908092534503 43.952089289189416, 15.543728291327625 43.95203802693345, 15.5442665463641 43.95182016167115, 15.544651014632677 43.95148695565854, 15.545663448009748 43.949295486797325, 15.546483646802926 43.947655089211025, 15.54…	Vransko Lake	Croatia	7	5748	biodiversity, flood control, water quality regulation, recreation, eco-tourism, research, livestock	burning, resource extraction, pollution	2007-09-08	Some red burning, illegal fhishing and peachers, illegal garbage disposal	460.5	9.18235
2020-01-04	2970.11	10	0	5	0	1	1	4	7	2951.17	424.301	3	0.0833333	9.22923	0	7.1	7.62071	vransko	29.4751	10.1882	3.58895	0.628821	0.181905	0.0244839	0	50.9659	4.9466	0	0.393025	0.00645738	5764.72	27936	4.84603	3	0	POLYGON ((15.540344970743831 43.952883856404924, 15.540434680815906 43.95275570031538, 15.541101091941869 43.952396863624415, 15.542267312086835 43.952255892195694, 15.542908092534503 43.952089289189416, 15.543728291327625 43.95203802693345, 15.5442665463641 43.95182016167115, 15.544651014632677 43.95148695565854, 15.545663448009748 43.949295486797325, 15.546483646802926 43.947655089211025, 15.54…	Vransko Lake	Croatia	7	5748	biodiversity, flood control, water quality regulation, recreation, eco-tourism, research, livestock	burning, resource extraction, pollution	2007-09-08	Some red burning, illegal fhishing and peachers, illegal garbage disposal	42.2	6.30357
2020-01-09	2858.73	12	5	0	1	0	8	3	12	2825.94	238.227	0	0	0	0	0	6.63357	vransko	29.4751	10.1882	3.58895	0.628821	0.181905	0.0244839	0	50.9659	4.9466	0	0.393025	0.00645738	5764.72	27936	4.84603	3	0	POLYGON ((15.540344970743831 43.952883856404924, 15.540434680815906 43.95275570031538, 15.541101091941869 43.952396863624415, 15.542267312086835 43.952255892195694, 15.542908092534503 43.952089289189416, 15.543728291327625 43.95203802693345, 15.5442665463641 43.95182016167115, 15.544651014632677 43.95148695565854, 15.545663448009748 43.949295486797325, 15.546483646802926 43.947655089211025, 15.54…	Vransko Lake	Croatia	7	5748	biodiversity, flood control, water quality regulation, recreation, eco-tourism, research, livestock	burning, resource extraction, pollution	2007-09-08	Some red burning, illegal fhishing and peachers, illegal garbage disposal	38.7	6.47888
2020-01-16	2982.64	14	0	9	0	1	1	4	6	2965.23	497.106	8	0.358974	27.5718	2.22045e-16	0	8.67	vransko	29.4751	10.1882	3.58895	0.628821	0.181905	0.0244839	0	50.9659	4.9466	0	0.393025	0.00645738	5764.72	27936	4.84603	3	0	POLYGON ((15.540344970743831 43.952883856404924, 15.540434680815906 43.95275570031538, 15.541101091941869 43.952396863624415, 15.542267312086835 43.952255892195694, 15.542908092534503 43.952089289189416, 15.543728291327625 43.95203802693345, 15.5442665463641 43.95182016167115, 15.544651014632677 43.95148695565854, 15.545663448009748 43.949295486797325, 15.546483646802926 43.947655089211025, 15.54…	Vransko Lake	Croatia	7	5748	biodiversity, flood control, water quality regulation, recreation, eco-tourism, research, livestock	burning, resource extraction, pollution	2007-09-08	Some red burning, illegal fhishing and peachers, illegal garbage disposal	14.4	7.67806
2020-01-21	2972.95	19	9	2	4	6	9	4	15	2922.22	198.197	4	0.0392157	6.00881	0	0	4.32857	vransko	29.4751	10.1882	3.58895	0.628821	0.181905	0.0244839	0	50.9659	4.9466	0	0.393025	0.00645738	5764.72	27936	4.84603	3	0	POLYGON ((15.540344970743831 43.952883856404924, 15.540434680815906 43.95275570031538, 15.541101091941869 43.952396863624415, 15.542267312086835 43.952255892195694, 15.542908092534503 43.952089289189416, 15.543728291327625 43.95203802693345, 15.5442665463641 43.95182016167115, 15.544651014632677 43.95148695565854, 15.545663448009748 43.949295486797325, 15.546483646802926 43.947655089211025, 15.54…	Vransko Lake	Croatia	7	5748	biodiversity, flood control, water quality regulation, recreation, eco-tourism, research, livestock	burning, resource extraction, pollution	2007-09-08	Some red burning, illegal fhishing and peachers, illegal garbage disposal	0	6.8152
2020-01-28	3023.6	9	6	4	3	3	0	2	3	3012.76	1007.87	6	0.535714	27.5593	0	0	12.7443	vransko	29.4751	10.1882	3.58895	0.628821	0.181905	0.0244839	0	50.9659	4.9466	0	0.393025	0.00645738	5764.72	27936	4.84603	3	0	POLYGON ((15.540344970743831 43.952883856404924, 15.540434680815906 43.95275570031538, 15.541101091941869 43.952396863624415, 15.542267312086835 43.952255892195694, 15.542908092534503 43.952089289189416, 15.543728291327625 43.95203802693345, 15.5442665463641 43.95182016167115, 15.544651014632677 43.95148695565854, 15.545663448009748 43.949295486797325, 15.546483646802926 43.947655089211025, 15.54…	Vransko Lake	Croatia	7	5748	biodiversity, flood control, water quality regulation, recreation, eco-tourism, research, livestock	burning, resource extraction, pollution	2007-09-08	Some red burning, illegal fhishing and peachers, illegal garbage disposal	34	9.14153
2020-02-02	2966.39	13	7	2	1	2	8	2	12	2927.98	247.199	1	0	1.82693	0	0	13.0186	vransko	29.4751	10.1882	3.58895	0.628821	0.181905	0.0244839	0	50.9659	4.9466	0	0.393025	0.00645738	5764.72	27936	4.84603	3	0	POLYGON ((15.540344970743831 43.952883856404924, 15.540434680815906 43.95275570031538, 15.541101091941869 43.952396863624415, 15.542267312086835 43.952255892195694, 15.542908092534503 43.952089289189416, 15.543728291327625 43.95203802693345, 15.5442665463641 43.95182016167115, 15.544651014632677 43.95148695565854, 15.545663448009748 43.949295486797325, 15.546483646802926 43.947655089211025, 15.54…	Vransko Lake	Croatia	7	5748	biodiversity, flood control, water quality regulation, recreation, eco-tourism, research, livestock	burning, resource extraction, pollution	2007-09-08	Some red burning, illegal fhishing and peachers, illegal garbage disposal	26.9	10.8279
2020-02-09	3019.93	9	3	4	2	1	1	2	4	3006.32	754.983	5	0.357143	20.4926	0	0	8.88214	vransko	29.4751	10.1882	3.58895	0.628821	0.181905	0.0244839	0	50.9659	4.9466	0	0.393025	0.00645738	5764.72	27936	4.84603	3	0	POLYGON ((15.540344970743831 43.952883856404924, 15.540434680815906 43.95275570031538, 15.541101091941869 43.952396863624415, 15.542267312086835 43.952255892195694, 15.542908092534503 43.952089289189416, 15.543728291327625 43.95203802693345, 15.5442665463641 43.95182016167115, 15.544651014632677 43.95148695565854, 15.545663448009748 43.949295486797325, 15.546483646802926 43.947655089211025, 15.54…	Vransko Lake	Croatia	7	5748	biodiversity, flood control, water quality regulation, recreation, eco-tourism, research, livestock	burning, resource extraction, pollution	2007-09-08	Some red burning, illegal fhishing and peachers, illegal garbage disposal	179.9	8.7049
2020-02-14	2969.99	17	6	1	1	1	13	2	17	2918.08	174.705	0	0	0	0	0	11.4321	vransko	29.4751	10.1882	3.58895	0.628821	0.181905	0.0244839	0	50.9659	4.9466	0	0.393025	0.00645738	5764.72	27936	4.84603	3	0	POLYGON ((15.540344970743831 43.952883856404924, 15.540434680815906 43.95275570031538, 15.541101091941869 43.952396863624415, 15.542267312086835 43.952255892195694, 15.542908092534503 43.952089289189416, 15.543728291327625 43.95203802693345, 15.5442665463641 43.95182016167115, 15.544651014632677 43.95148695565854, 15.545663448009748 43.949295486797325, 15.546483646802926 43.947655089211025, 15.54…	Vransko Lake	Croatia	7	5748	biodiversity, flood control, water quality regulation, recreation, eco-tourism, research, livestock	burning, resource extraction, pollution	2007-09-08	Some red burning, illegal fhishing and peachers, illegal garbage disposal	27.8	10.634
2020-02-21	3017.94	15	2	8	2	2	2	3	8	2994.2	377.242	7	0.230769	21.1831	0	0	8.57	vransko	29.4751	10.1882	3.58895	0.628821	0.181905	0.0244839	0	50.9659	4.9466	0	0.393025	0.00645738	5764.72	27936	4.84603	3	0	POLYGON ((15.540344970743831 43.952883856404924, 15.540434680815906 43.95275570031538, 15.541101091941869 43.952396863624415, 15.542267312086835 43.952255892195694, 15.542908092534503 43.952089289189416, 15.543728291327625 43.95203802693345, 15.5442665463641 43.95182016167115, 15.544651014632677 43.95148695565854, 15.545663448009748 43.949295486797325, 15.546483646802926 43.947655089211025, 15.54…	Vransko Lake	Croatia	7	5748	biodiversity, flood control, water quality regulation, recreation, eco-tourism, research, livestock	burning, resource extraction, pollution	2007-09-08	Some red burning, illegal fhishing and peachers, illegal garbage disposal	46.3	9.78082
2020-02-26	2986.12	16	10	2	1	2	9	4	15	2946.21	199.075	1	0	1.46158	0	148.3	10.5236	vransko	29.4751	10.1882	3.58895	0.628821	0.181905	0.0244839	0	50.9659	4.9466	0	0.393025	0.00645738	5764.72	27936	4.84603	3	0	POLYGON ((15.540344970743831 43.952883856404924, 15.540434680815906 43.95275570031538, 15.541101091941869 43.952396863624415, 15.542267312086835 43.952255892195694, 15.542908092534503 43.952089289189416, 15.543728291327625 43.95203802693345, 15.5442665463641 43.95182016167115, 15.544651014632677 43.95148695565854, 15.545663448009748 43.949295486797325, 15.546483646802926 43.947655089211025, 15.54…	Vransko Lake	Croatia	7	5748	biodiversity, flood control, water quality regulation, recreation, eco-tourism, research, livestock	burning, resource extraction, pollution	2007-09-08	Some red burning, illegal fhishing and peachers, illegal garbage disposal	180.9	10.0447
2020-03-04	2991.19	18	3	10	2	1	1	5	11	2953.51	271.926	7	0.154412	16.7878	2.22045e-16	0	9.925	vransko	29.4751	10.1882	3.58895	0.628821	0.181905	0.0244839	0	50.9659	4.9466	0	0.393025	0.00645738	5764.72	27936	4.84603	3	0	POLYGON ((15.540344970743831 43.952883856404924, 15.540434680815906 43.95275570031538, 15.541101091941869 43.952396863624415, 15.542267312086835 43.952255892195694, 15.542908092534503 43.952089289189416, 15.543728291327625 43.95203802693345, 15.5442665463641 43.95182016167115, 15.544651014632677 43.95148695565854, 15.545663448009748 43.949295486797325, 15.546483646802926 43.947655089211025, 15.54…	Vransko Lake	Croatia	7	5748	biodiversity, flood control, water quality regulation, recreation, eco-tourism, research, livestock	burning, resource extraction, pollution	2007-09-08	Some red burning, illegal fhishing and peachers, illegal garbage disposal	175.5	10.7244
2020-03-09	2971.62	22	12	5	4	7	9	4	17	2926.92	174.801	5	0.047619	7.80465	0	0	9.16286	vransko	29.4751	10.1882	3.58895	0.628821	0.181905	0.0244839	0	50.9659	4.9466	0	0.393025	0.00645738	5764.72	27936	4.84603	3	0	POLYGON ((15.540344970743831 43.952883856404924, 15.540434680815906 43.95275570031538, 15.541101091941869 43.952396863624415, 15.542267312086835 43.952255892195694, 15.542908092534503 43.952089289189416, 15.543728291327625 43.95203802693345, 15.5442665463641 43.95182016167115, 15.544651014632677 43.95148695565854, 15.545663448009748 43.949295486797325, 15.546483646802926 43.947655089211025, 15.54…	Vransko Lake	Croatia	7	5748	biodiversity, flood control, water quality regulation, recreation, eco-tourism, research, livestock	burning, resource extraction, pollution	2007-09-08	Some red burning, illegal fhishing and peachers, illegal garbage disposal	168.6	10.1318
2020-03-16	3011.28	17	9	5	8	5	0	4	8	2981.28	376.41	9	0.3	27.4879	0	0	9.09571	vransko	29.4751	10.1882	3.58895	0.628821	0.181905	0.0244839	0	50.9659	4.9466	0	0.393025	0.00645738	5764.72	27936	4.84603	3	0	POLYGON ((15.540344970743831 43.952883856404924, 15.540434680815906 43.95275570031538, 15.541101091941869 43.952396863624415, 15.542267312086835 43.952255892195694, 15.542908092534503 43.952089289189416, 15.543728291327625 43.95203802693345, 15.5442665463641 43.95182016167115, 15.544651014632677 43.95148695565854, 15.545663448009748 43.949295486797325, 15.546483646802926 43.947655089211025, 15.54…	Vransko Lake	Croatia	7	5748	biodiversity, flood control, water quality regulation, recreation, eco-tourism, research, livestock	burning, resource extraction, pollution	2007-09-08	Some red burning, illegal fhishing and peachers, illegal garbage disposal	57.8	11.3997
2020-03-21	2940.88	17	13	0	3	4	11	3	16	2895.61	183.805	1	0	1.02859	0	0	12.1629	vransko	29.4751	10.1882	3.58895	0.628821	0.181905	0.0244839	0	50.9659	4.9466	0	0.393025	0.00645738	5764.72	27936	4.84603	3	0	POLYGON ((15.540344970743831 43.952883856404924, 15.540434680815906 43.95275570031538, 15.541101091941869 43.952396863624415, 15.542267312086835 43.952255892195694, 15.542908092534503 43.952089289189416, 15.543728291327625 43.95203802693345, 15.5442665463641 43.95182016167115, 15.544651014632677 43.95148695565854, 15.545663448009748 43.949295486797325, 15.546483646802926 43.947655089211025, 15.54…	Vransko Lake	Croatia	7	5748	biodiversity, flood control, water quality regulation, recreation, eco-tourism, research, livestock	burning, resource extraction, pollution	2007-09-08	Some red burning, illegal fhishing and peachers, illegal garbage disposal	0	11.599
2020-03-28	2993.68	18	3	12	2	1	1	3	8	2969.11	374.21	10	0.330882	34.7707	0	4.6	11.1443	vransko	29.4751	10.1882	3.58895	0.628821	0.181905	0.0244839	0	50.9659	4.9466	0	0.393025	0.00645738	5764.72	27936	4.84603	3	0	POLYGON ((15.540344970743831 43.952883856404924, 15.540434680815906 43.95275570031538, 15.541101091941869 43.952396863624415, 15.542267312086835 43.952255892195694, 15.542908092534503 43.952089289189416, 15.543728291327625 43.95203802693345, 15.5442665463641 43.95182016167115, 15.544651014632677 43.95148695565854, 15.545663448009748 43.949295486797325, 15.546483646802926 43.947655089211025, 15.54…	Vransko Lake	Croatia	7	5748	biodiversity, flood control, water quality regulation, recreation, eco-tourism, research, livestock	burning, resource extraction, pollution	2007-09-08	Some red burning, illegal fhishing and peachers, illegal garbage disposal	214.3	7.64735
2020-04-02	3033.45	18	15	0	3	3	12	3	18	2978.03	168.525	0	0	0	0	0	7.65929	vransko	29.4751	10.1882	3.58895	0.628821	0.181905	0.0244839	0	50.9659	4.9466	0	0.393025	0.00645738	5764.72	27936	4.84603	3	0	POLYGON ((15.540344970743831 43.952883856404924, 15.540434680815906 43.95275570031538, 15.541101091941869 43.952396863624415, 15.542267312086835 43.952255892195694, 15.542908092534503 43.952089289189416, 15.543728291327625 43.95203802693345, 15.5442665463641 43.95182016167115, 15.544651014632677 43.95148695565854, 15.545663448009748 43.949295486797325, 15.546483646802926 43.947655089211025, 15.54…	Vransko Lake	Croatia	7	5748	biodiversity, flood control, water quality regulation, recreation, eco-tourism, research, livestock	burning, resource extraction, pollution	2007-09-08	Some red burning, illegal fhishing and peachers, illegal garbage disposal	6.9	9.42898
2020-04-09	2983.06	14	2	9	1	2	0	4	6	2965.66	497.176	8	0.358974	27.574	0	0	13.74	vransko	29.4751	10.1882	3.58895	0.628821	0.181905	0.0244839	0	50.9659	4.9466	0	0.393025	0.00645738	5764.72	27936	4.84603	3	0	POLYGON ((15.540344970743831 43.952883856404924, 15.540434680815906 43.95275570031538, 15.541101091941869 43.952396863624415, 15.542267312086835 43.952255892195694, 15.542908092534503 43.952089289189416, 15.543728291327625 43.95203802693345, 15.5442665463641 43.95182016167115, 15.544651014632677 43.95148695565854, 15.545663448009748 43.949295486797325, 15.546483646802926 43.947655089211025, 15.54…	Vransko Lake	Croatia	7	5748	biodiversity, flood control, water quality regulation, recreation, eco-tourism, research, livestock	burning, resource extraction, pollution	2007-09-08	Some red burning, illegal fhishing and peachers, illegal garbage disposal	0	13.5255
2020-04-14	2954.1	14	12	3	4	5	6	1	12	2915.61	246.175	2	0.0128205	3.37919	0	69.8	9.57429	vransko	29.4751	10.1882	3.58895	0.628821	0.181905	0.0244839	0	50.9659	4.9466	0	0.393025	0.00645738	5764.72	27936	4.84603	3	0	POLYGON ((15.540344970743831 43.952883856404924, 15.540434680815906 43.95275570031538, 15.541101091941869 43.952396863624415, 15.542267312086835 43.952255892195694, 15.542908092534503 43.952089289189416, 15.543728291327625 43.95203802693345, 15.5442665463641 43.95182016167115, 15.544651014632677 43.95148695565854, 15.545663448009748 43.949295486797325, 15.546483646802926 43.947655089211025, 15.54…	Vransko Lake	Croatia	7	5748	biodiversity, flood control, water quality regulation, recreation, eco-tourism, research, livestock	burning, resource extraction, pollution	2007-09-08	Some red burning, illegal fhishing and peachers, illegal garbage disposal	88.8	14.505
2020-04-21	3006.23	7	5	3	2	1	0	2	4	2992.04	751.557	3	0.2	11.5241	0	0	14.6964	vransko	29.4751	10.1882	3.58895	0.628821	0.181905	0.0244839	0	50.9659	4.9466	0	0.393025	0.00645738	5764.72	27936	4.84603	3	0	POLYGON ((15.540344970743831 43.952883856404924, 15.540434680815906 43.95275570031538, 15.541101091941869 43.952396863624415, 15.542267312086835 43.952255892195694, 15.542908092534503 43.952089289189416, 15.543728291327625 43.95203802693345, 15.5442665463641 43.95182016167115, 15.544651014632677 43.95148695565854, 15.545663448009748 43.949295486797325, 15.546483646802926 43.947655089211025, 15.54…	Vransko Lake	Croatia	7	5748	biodiversity, flood control, water quality regulation, recreation, eco-tourism, research, livestock	burning, resource extraction, pollution	2007-09-08	Some red burning, illegal fhishing and peachers, illegal garbage disposal	367.6	14.6684
2020-04-26	3020.77	20	4	2	1	1	14	3	18	2967.34	167.821	2	0.00584795	2.0218	0	0	15.6393	vransko	29.4751	10.1882	3.58895	0.628821	0.181905	0.0244839	0	50.9659	4.9466	0	0.393025	0.00645738	5764.72	27936	4.84603	3	0	POLYGON ((15.540344970743831 43.952883856404924, 15.540434680815906 43.95275570031538, 15.541101091941869 43.952396863624415, 15.542267312086835 43.952255892195694, 15.542908092534503 43.952089289189416, 15.543728291327625 43.95203802693345, 15.5442665463641 43.95182016167115, 15.544651014632677 43.95148695565854, 15.545663448009748 43.949295486797325, 15.546483646802926 43.947655089211025, 15.54…	Vransko Lake	Croatia	7	5748	biodiversity, flood control, water quality regulation, recreation, eco-tourism, research, livestock	burning, resource extraction, pollution	2007-09-08	Some red burning, illegal fhishing and peachers, illegal garbage disposal	407	15.4412
2020-05-03	2880.27	6	3	3	1	1	0	2	3	2869.15	960.091	3	0.3	13.8268	0	0	15.7514	vransko	29.4751	10.1882	3.58895	0.628821	0.181905	0.0244839	0	50.9659	4.9466	0	0.393025	0.00645738	5764.72	27936	4.84603	3	0	POLYGON ((15.540344970743831 43.952883856404924, 15.540434680815906 43.95275570031538, 15.541101091941869 43.952396863624415, 15.542267312086835 43.952255892195694, 15.542908092534503 43.952089289189416, 15.543728291327625 43.95203802693345, 15.5442665463641 43.95182016167115, 15.544651014632677 43.95148695565854, 15.545663448009748 43.949295486797325, 15.546483646802926 43.947655089211025, 15.54…	Vransko Lake	Croatia	7	5748	biodiversity, flood control, water quality regulation, recreation, eco-tourism, research, livestock	burning, resource extraction, pollution	2007-09-08	Some red burning, illegal fhishing and peachers, illegal garbage disposal	222.9	16.6174
2020-05-08	2952.22	23	4	5	4	4	12	2	17	2898.79	173.66	6	0.0649351	10.4866	2.22045e-16	0	17.4679	vransko	29.4751	10.1882	3.58895	0.628821	0.181905	0.0244839	0	50.9659	4.9466	0	0.393025	0.00645738	5764.72	27936	4.84603	3	0	POLYGON ((15.540344970743831 43.952883856404924, 15.540434680815906 43.95275570031538, 15.541101091941869 43.952396863624415, 15.542267312086835 43.952255892195694, 15.542908092534503 43.952089289189416, 15.543728291327625 43.95203802693345, 15.5442665463641 43.95182016167115, 15.544651014632677 43.95148695565854, 15.545663448009748 43.949295486797325, 15.546483646802926 43.947655089211025, 15.54…	Vransko Lake	Croatia	7	5748	biodiversity, flood control, water quality regulation, recreation, eco-tourism, research, livestock	burning, resource extraction, pollution	2007-09-08	Some red burning, illegal fhishing and peachers, illegal garbage disposal	191.9	16.2858
2020-05-15	2899.86	12	9	5	4	4	0	3	7	2878.52	414.266	5	0.181818	14.9071	0	0	20.6579	vransko	29.4751	10.1882	3.58895	0.628821	0.181905	0.0244839	0	50.9659	4.9466	0	0.393025	0.00645738	5764.72	27936	4.84603	3	0	POLYGON ((15.540344970743831 43.952883856404924, 15.540434680815906 43.95275570031538, 15.541101091941869 43.952396863624415, 15.542267312086835 43.952255892195694, 15.542908092534503 43.952089289189416, 15.543728291327625 43.95203802693345, 15.5442665463641 43.95182016167115, 15.544651014632677 43.95148695565854, 15.545663448009748 43.949295486797325, 15.546483646802926 43.947655089211025, 15.54…	Vransko Lake	Croatia	7	5748	biodiversity, flood control, water quality regulation, recreation, eco-tourism, research, livestock	burning, resource extraction, pollution	2007-09-08	Some red burning, illegal fhishing and peachers, illegal garbage disposal	72.6	18.9614
2020-05-20	2904.22	12	7	1	1	1	7	3	12	2868.89	242.019	0	0	0	0	136.3	19.3364	vransko	29.4751	10.1882	3.58895	0.628821	0.181905	0.0244839	0	50.9659	4.9466	0	0.393025	0.00645738	5764.72	27936	4.84603	3	0	POLYGON ((15.540344970743831 43.952883856404924, 15.540434680815906 43.95275570031538, 15.541101091941869 43.952396863624415, 15.542267312086835 43.952255892195694, 15.542908092534503 43.952089289189416, 15.543728291327625 43.95203802693345, 15.5442665463641 43.95182016167115, 15.544651014632677 43.95148695565854, 15.545663448009748 43.949295486797325, 15.546483646802926 43.947655089211025, 15.54…	Vransko Lake	Croatia	7	5748	biodiversity, flood control, water quality regulation, recreation, eco-tourism, research, livestock	burning, resource extraction, pollution	2007-09-08	Some red burning, illegal fhishing and peachers, illegal garbage disposal	351.4	20.1987
2020-05-27	2859.51	5	0	2	0	1	0	3	4	2846.89	714.878	1	0	5.48075	0	25.1	17.2257	vransko	29.4751	10.1882	3.58895	0.628821	0.181905	0.0244839	0	50.9659	4.9466	0	0.393025	0.00645738	5764.72	27936	4.84603	3	0	POLYGON ((15.540344970743831 43.952883856404924, 15.540434680815906 43.95275570031538, 15.541101091941869 43.952396863624415, 15.542267312086835 43.952255892195694, 15.542908092534503 43.952089289189416, 15.543728291327625 43.95203802693345, 15.5442665463641 43.95182016167115, 15.544651014632677 43.95148695565854, 15.545663448009748 43.949295486797325, 15.546483646802926 43.947655089211025, 15.54…	Vransko Lake	Croatia	7	5748	biodiversity, flood control, water quality regulation, recreation, eco-tourism, research, livestock	burning, resource extraction, pollution	2007-09-08	Some red burning, illegal fhishing and peachers, illegal garbage disposal	300.2	18.597
2020-06-01	2969.39	20	4	1	2	1	16	1	18	2878.5	164.966	2	0	2.02006	0.489862	106.6	18.13	vransko	29.4751	10.1882	3.58895	0.628821	0.181905	0.0244839	0	50.9659	4.9466	0	0.393025	0.00645738	5764.72	27936	4.84603	3	0	POLYGON ((15.540344970743831 43.952883856404924, 15.540434680815906 43.95275570031538, 15.541101091941869 43.952396863624415, 15.542267312086835 43.952255892195694, 15.542908092534503 43.952089289189416, 15.543728291327625 43.95203802693345, 15.5442665463641 43.95182016167115, 15.544651014632677 43.95148695565854, 15.545663448009748 43.949295486797325, 15.546483646802926 43.947655089211025, 15.54…	Vransko Lake	Croatia	7	5748	biodiversity, flood control, water quality regulation, recreation, eco-tourism, research, livestock	burning, resource extraction, pollution	2007-09-08	Some red burning, illegal fhishing and peachers, illegal garbage disposal	420.3	17.7511
2020-06-08	2613.45	9	2	4	1	1	0	4	8	2563.49	326.682	1	0	2.05736	0	87.2	19.7864	vransko	29.4751	10.1882	3.58895	0.628821	0.181905	0.0244839	0	50.9659	4.9466	0	0.393025	0.00645738	5764.72	27936	4.84603	3	0	POLYGON ((15.540344970743831 43.952883856404924, 15.540434680815906 43.95275570031538, 15.541101091941869 43.952396863624415, 15.542267312086835 43.952255892195694, 15.542908092534503 43.952089289189416, 15.543728291327625 43.95203802693345, 15.5442665463641 43.95182016167115, 15.544651014632677 43.95148695565854, 15.545663448009748 43.949295486797325, 15.546483646802926 43.947655089211025, 15.54…	Vransko Lake	Croatia	7	5748	biodiversity, flood control, water quality regulation, recreation, eco-tourism, research, livestock	burning, resource extraction, pollution	2007-09-08	Some red burning, illegal fhishing and peachers, illegal garbage disposal	227.9	19.6412
2020-06-13	2922.81	21	5	3	2	3	13	3	19	2866.9	153.832	2	0	1.91915	0.489867	0	21.3743	vransko	29.4751	10.1882	3.58895	0.628821	0.181905	0.0244839	0	50.9659	4.9466	0	0.393025	0.00645738	5764.72	27936	4.84603	3	0	POLYGON ((15.540344970743831 43.952883856404924, 15.540434680815906 43.95275570031538, 15.541101091941869 43.952396863624415, 15.542267312086835 43.952255892195694, 15.542908092534503 43.952089289189416, 15.543728291327625 43.95203802693345, 15.5442665463641 43.95182016167115, 15.544651014632677 43.95148695565854, 15.545663448009748 43.949295486797325, 15.546483646802926 43.947655089211025, 15.54…	Vransko Lake	Croatia	7	5748	biodiversity, flood control, water quality regulation, recreation, eco-tourism, research, livestock	burning, resource extraction, pollution	2007-09-08	Some red burning, illegal fhishing and peachers, illegal garbage disposal	441.1	19.762
2020-06-20	2853.01	7	2	2	1	1	0	4	7	2833.6	407.573	0	0	0	0	0	21.3893	vransko	29.4751	10.1882	3.58895	0.628821	0.181905	0.0244839	0	50.9659	4.9466	0	0.393025	0.00645738	5764.72	27936	4.84603	3	0	POLYGON ((15.540344970743831 43.952883856404924, 15.540434680815906 43.95275570031538, 15.541101091941869 43.952396863624415, 15.542267312086835 43.952255892195694, 15.542908092534503 43.952089289189416, 15.543728291327625 43.95203802693345, 15.5442665463641 43.95182016167115, 15.544651014632677 43.95148695565854, 15.545663448009748 43.949295486797325, 15.546483646802926 43.947655089211025, 15.54…	Vransko Lake	Croatia	7	5748	biodiversity, flood control, water quality regulation, recreation, eco-tourism, research, livestock	burning, resource extraction, pollution	2007-09-08	Some red burning, illegal fhishing and peachers, illegal garbage disposal	505.7	21.2418
2020-06-25	2894.06	23	3	1	1	1	17	4	22	2818.62	131.548	1	0	0.748089	0	0	23.6464	vransko	29.4751	10.1882	3.58895	0.628821	0.181905	0.0244839	0	50.9659	4.9466	0	0.393025	0.00645738	5764.72	27936	4.84603	3	0	POLYGON ((15.540344970743831 43.952883856404924, 15.540434680815906 43.95275570031538, 15.541101091941869 43.952396863624415, 15.542267312086835 43.952255892195694, 15.542908092534503 43.952089289189416, 15.543728291327625 43.95203802693345, 15.5442665463641 43.95182016167115, 15.544651014632677 43.95148695565854, 15.545663448009748 43.949295486797325, 15.546483646802926 43.947655089211025, 15.54…	Vransko Lake	Croatia	7	5748	biodiversity, flood control, water quality regulation, recreation, eco-tourism, research, livestock	burning, resource extraction, pollution	2007-09-08	Some red burning, illegal fhishing and peachers, illegal garbage disposal	723.8	22.8845
2020-07-02	2881.04	14	4	4	2	1	1	7	10	2855.38	288.104	4	0.0769231	8.88699	2.22045e-16	91.7	27.2693	vransko	29.4751	10.1882	3.58895	0.628821	0.181905	0.0244839	0	50.9659	4.9466	0	0.393025	0.00645738	5764.72	27936	4.84603	3	0	POLYGON ((15.540344970743831 43.952883856404924, 15.540434680815906 43.95275570031538, 15.541101091941869 43.952396863624415, 15.542267312086835 43.952255892195694, 15.542908092534503 43.952089289189416, 15.543728291327625 43.95203802693345, 15.5442665463641 43.95182016167115, 15.544651014632677 43.95148695565854, 15.545663448009748 43.949295486797325, 15.546483646802926 43.947655089211025, 15.54…	Vransko Lake	Croatia	7	5748	biodiversity, flood control, water quality regulation, recreation, eco-tourism, research, livestock	burning, resource extraction, pollution	2007-09-08	Some red burning, illegal fhishing and peachers, illegal garbage disposal	478.2	26.2289
2020-07-07	3144.65	51	8	4	2	2	41	4	47	2949.37	66.9074	4	0	1.42622	0.746693	9.7	21.8557	vransko	29.4751	10.1882	3.58895	0.628821	0.181905	0.0244839	0	50.9659	4.9466	0	0.393025	0.00645738	5764.72	27936	4.84603	3	0	POLYGON ((15.540344970743831 43.952883856404924, 15.540434680815906 43.95275570031538, 15.541101091941869 43.952396863624415, 15.542267312086835 43.952255892195694, 15.542908092534503 43.952089289189416, 15.543728291327625 43.95203802693345, 15.5442665463641 43.95182016167115, 15.544651014632677 43.95148695565854, 15.545663448009748 43.949295486797325, 15.546483646802926 43.947655089211025, 15.54…	Vransko Lake	Croatia	7	5748	biodiversity, flood control, water quality regulation, recreation, eco-tourism, research, livestock	burning, resource extraction, pollution	2007-09-08	Some red burning, illegal fhishing and peachers, illegal garbage disposal	412.8	25.5297
2020-07-14	2865.86	10	2	5	1	3	0	4	10	2835.07	286.586	0	0	0	0	0	22.69	vransko	29.4751	10.1882	3.58895	0.628821	0.181905	0.0244839	0	50.9659	4.9466	0	0.393025	0.00645738	5764.72	27936	4.84603	3	0	POLYGON ((15.540344970743831 43.952883856404924, 15.540434680815906 43.95275570031538, 15.541101091941869 43.952396863624415, 15.542267312086835 43.952255892195694, 15.542908092534503 43.952089289189416, 15.543728291327625 43.95203802693345, 15.5442665463641 43.95182016167115, 15.544651014632677 43.95148695565854, 15.545663448009748 43.949295486797325, 15.546483646802926 43.947655089211025, 15.54…	Vransko Lake	Croatia	7	5748	biodiversity, flood control, water quality regulation, recreation, eco-tourism, research, livestock	burning, resource extraction, pollution	2007-09-08	Some red burning, illegal fhishing and peachers, illegal garbage disposal	0	23.7071
2020-07-19	2877.3	18	2	5	1	2	6	6	16	2825.69	179.831	2	0.00735294	2.25898	0	0	21.6357	vransko	29.4751	10.1882	3.58895	0.628821	0.181905	0.0244839	0	50.9659	4.9466	0	0.393025	0.00645738	5764.72	27936	4.84603	3	0	POLYGON ((15.540344970743831 43.952883856404924, 15.540434680815906 43.95275570031538, 15.541101091941869 43.952396863624415, 15.542267312086835 43.952255892195694, 15.542908092534503 43.952089289189416, 15.543728291327625 43.95203802693345, 15.5442665463641 43.95182016167115, 15.544651014632677 43.95148695565854, 15.545663448009748 43.949295486797325, 15.546483646802926 43.947655089211025, 15.54…	Vransko Lake	Croatia	7	5748	biodiversity, flood control, water quality regulation, recreation, eco-tourism, research, livestock	burning, resource extraction, pollution	2007-09-08	Some red burning, illegal fhishing and peachers, illegal garbage disposal	262.1	22.0488
2020-07-26	2870.79	12	3	3	1	2	1	7	11	2842.02	260.981	1	0	1.49576	0	0	24.34	vransko	29.4751	10.1882	3.58895	0.628821	0.181905	0.0244839	0	50.9659	4.9466	0	0.393025	0.00645738	5764.72	27936	4.84603	3	0	POLYGON ((15.540344970743831 43.952883856404924, 15.540434680815906 43.95275570031538, 15.541101091941869 43.952396863624415, 15.542267312086835 43.952255892195694, 15.542908092534503 43.952089289189416, 15.543728291327625 43.95203802693345, 15.5442665463641 43.95182016167115, 15.544651014632677 43.95148695565854, 15.545663448009748 43.949295486797325, 15.546483646802926 43.947655089211025, 15.54…	Vransko Lake	Croatia	7	5748	biodiversity, flood control, water quality regulation, recreation, eco-tourism, research, livestock	burning, resource extraction, pollution	2007-09-08	Some red burning, illegal fhishing and peachers, illegal garbage disposal	71.2	24.5013
2020-07-31	2892.78	25	2	1	1	1	14	9	24	2810.62	120.533	1	0	0.685775	0	0	27.8229	vransko	29.4751	10.1882	3.58895	0.628821	0.181905	0.0244839	0	50.9659	4.9466	0	0.393025	0.00645738	5764.72	27936	4.84603	3	0	POLYGON ((15.540344970743831 43.952883856404924, 15.540434680815906 43.95275570031538, 15.541101091941869 43.952396863624415, 15.542267312086835 43.952255892195694, 15.542908092534503 43.952089289189416, 15.543728291327625 43.95203802693345, 15.5442665463641 43.95182016167115, 15.544651014632677 43.95148695565854, 15.545663448009748 43.949295486797325, 15.546483646802926 43.947655089211025, 15.54…	Vransko Lake	Croatia	7	5748	biodiversity, flood control, water quality regulation, recreation, eco-tourism, research, livestock	burning, resource extraction, pollution	2007-09-08	Some red burning, illegal fhishing and peachers, illegal garbage disposal	0	26.1116
2020-08-07	2860.59	7	3	1	2	1	0	4	5	2845.66	572.119	2	0.0666667	7.32181	0	0	26.2279	vransko	29.4751	10.1882	3.58895	0.628821	0.181905	0.0244839	0	50.9659	4.9466	0	0.393025	0.00645738	5764.72	27936	4.84603	3	0	POLYGON ((15.540344970743831 43.952883856404924, 15.540434680815906 43.95275570031538, 15.541101091941869 43.952396863624415, 15.542267312086835 43.952255892195694, 15.542908092534503 43.952089289189416, 15.543728291327625 43.95203802693345, 15.5442665463641 43.95182016167115, 15.544651014632677 43.95148695565854, 15.545663448009748 43.949295486797325, 15.546483646802926 43.947655089211025, 15.54…	Vransko Lake	Croatia	7	5748	biodiversity, flood control, water quality regulation, recreation, eco-tourism, research, livestock	burning, resource extraction, pollution	2007-09-08	Some red burning, illegal fhishing and peachers, illegal garbage disposal	923.4	25.5311
2020-08-12	2902.08	21	3	1	3	2	13	4	18	2844.35	161.226	3	0.0157895	3.77608	0	7.9	26.0221	vransko	29.4751	10.1882	3.58895	0.628821	0.181905	0.0244839	0	50.9659	4.9466	0	0.393025	0.00645738	5764.72	27936	4.84603	3	0	POLYGON ((15.540344970743831 43.952883856404924, 15.540434680815906 43.95275570031538, 15.541101091941869 43.952396863624415, 15.542267312086835 43.952255892195694, 15.542908092534503 43.952089289189416, 15.543728291327625 43.95203802693345, 15.5442665463641 43.95182016167115, 15.544651014632677 43.95148695565854, 15.545663448009748 43.949295486797325, 15.546483646802926 43.947655089211025, 15.54…	Vransko Lake	Croatia	7	5748	biodiversity, flood control, water quality regulation, recreation, eco-tourism, research, livestock	burning, resource extraction, pollution	2007-09-08	Some red burning, illegal fhishing and peachers, illegal garbage disposal	284.1	26.2791
2020-08-19	2850.18	7	4	0	2	2	0	5	6	2836.02	475.03	1	0	2.74291	0	0	24.0086	vransko	29.4751	10.1882	3.58895	0.628821	0.181905	0.0244839	0	50.9659	4.9466	0	0.393025	0.00645738	5764.72	27936	4.84603	3	0	POLYGON ((15.540344970743831 43.952883856404924, 15.540434680815906 43.95275570031538, 15.541101091941869 43.952396863624415, 15.542267312086835 43.952255892195694, 15.542908092534503 43.952089289189416, 15.543728291327625 43.95203802693345, 15.5442665463641 43.95182016167115, 15.544651014632677 43.95148695565854, 15.545663448009748 43.949295486797325, 15.546483646802926 43.947655089211025, 15.54…	Vransko Lake	Croatia	7	5748	biodiversity, flood control, water quality regulation, recreation, eco-tourism, research, livestock	burning, resource extraction, pollution	2007-09-08	Some red burning, illegal fhishing and peachers, illegal garbage disposal	0	25.3445
2020-08-24	2920.82	26	2	0	1	0	20	5	25	2836.5	116.833	1	0	0.876945	0	8.8	25.2071	vransko	29.4751	10.1882	3.58895	0.628821	0.181905	0.0244839	0	50.9659	4.9466	0	0.393025	0.00645738	5764.72	27936	4.84603	3	0	POLYGON ((15.540344970743831 43.952883856404924, 15.540434680815906 43.95275570031538, 15.541101091941869 43.952396863624415, 15.542267312086835 43.952255892195694, 15.542908092534503 43.952089289189416, 15.543728291327625 43.95203802693345, 15.5442665463641 43.95182016167115, 15.544651014632677 43.95148695565854, 15.545663448009748 43.949295486797325, 15.546483646802926 43.947655089211025, 15.54…	Vransko Lake	Croatia	7	5748	biodiversity, flood control, water quality regulation, recreation, eco-tourism, research, livestock	burning, resource extraction, pollution	2007-09-08	Some red burning, illegal fhishing and peachers, illegal garbage disposal	8.8	25.1604
2020-08-31	2855.02	5	0	2	0	1	0	3	4	2841.1	713.756	1	0	4.11484	0	0	20.5507	vransko	29.4751	10.1882	3.58895	0.628821	0.181905	0.0244839	0	50.9659	4.9466	0	0.393025	0.00645738	5764.72	27936	4.84603	3	0	POLYGON ((15.540344970743831 43.952883856404924, 15.540434680815906 43.95275570031538, 15.541101091941869 43.952396863624415, 15.542267312086835 43.952255892195694, 15.542908092534503 43.952089289189416, 15.543728291327625 43.95203802693345, 15.5442665463641 43.95182016167115, 15.544651014632677 43.95148695565854, 15.545663448009748 43.949295486797325, 15.546483646802926 43.947655089211025, 15.54…	Vransko Lake	Croatia	7	5748	biodiversity, flood control, water quality regulation, recreation, eco-tourism, research, livestock	burning, resource extraction, pollution	2007-09-08	Some red burning, illegal fhishing and peachers, illegal garbage disposal	34.3	24.6998
2020-09-05	2892.96	18	4	1	3	2	13	1	16	2844.15	180.81	2	0.00735294	2.58414	0	0	22.1793	vransko	29.4751	10.1882	3.58895	0.628821	0.181905	0.0244839	0	50.9659	4.9466	0	0.393025	0.00645738	5764.72	27936	4.84603	3	0	POLYGON ((15.540344970743831 43.952883856404924, 15.540434680815906 43.95275570031538, 15.541101091941869 43.952396863624415, 15.542267312086835 43.952255892195694, 15.542908092534503 43.952089289189416, 15.543728291327625 43.95203802693345, 15.5442665463641 43.95182016167115, 15.544651014632677 43.95148695565854, 15.545663448009748 43.949295486797325, 15.546483646802926 43.947655089211025, 15.54…	Vransko Lake	Croatia	7	5748	biodiversity, flood control, water quality regulation, recreation, eco-tourism, research, livestock	burning, resource extraction, pollution	2007-09-08	Some red burning, illegal fhishing and peachers, illegal garbage disposal	165	21.6115
2020-09-12	2838.64	7	2	3	1	2	0	3	7	2814.95	405.52	0	0	0	0	0	24.6736	vransko	29.4751	10.1882	3.58895	0.628821	0.181905	0.0244839	0	50.9659	4.9466	0	0.393025	0.00645738	5764.72	27936	4.84603	3	0	POLYGON ((15.540344970743831 43.952883856404924, 15.540434680815906 43.95275570031538, 15.541101091941869 43.952396863624415, 15.542267312086835 43.952255892195694, 15.542908092534503 43.952089289189416, 15.543728291327625 43.95203802693345, 15.5442665463641 43.95182016167115, 15.544651014632677 43.95148695565854, 15.545663448009748 43.949295486797325, 15.546483646802926 43.947655089211025, 15.54…	Vransko Lake	Croatia	7	5748	biodiversity, flood control, water quality regulation, recreation, eco-tourism, research, livestock	burning, resource extraction, pollution	2007-09-08	Some red burning, illegal fhishing and peachers, illegal garbage disposal	0	23.5197
2020-09-17	2816.33	21	3	2	1	2	14	4	18	2759.86	156.463	3	0	2.74279	0.661208	0	25.4314	vransko	29.4751	10.1882	3.58895	0.628821	0.181905	0.0244839	0	50.9659	4.9466	0	0.393025	0.00645738	5764.72	27936	4.84603	3	0	POLYGON ((15.540344970743831 43.952883856404924, 15.540434680815906 43.95275570031538, 15.541101091941869 43.952396863624415, 15.542267312086835 43.952255892195694, 15.542908092534503 43.952089289189416, 15.543728291327625 43.95203802693345, 15.5442665463641 43.95182016167115, 15.544651014632677 43.95148695565854, 15.545663448009748 43.949295486797325, 15.546483646802926 43.947655089211025, 15.54…	Vransko Lake	Croatia	7	5748	biodiversity, flood control, water quality regulation, recreation, eco-tourism, research, livestock	burning, resource extraction, pollution	2007-09-08	Some red burning, illegal fhishing and peachers, illegal garbage disposal	0	25.1596
2020-09-24	2854.08	5	3	2	1	1	0	2	4	2842.02	713.52	1	0	4.11428	0	292.1	20.7521	vransko	29.4751	10.1882	3.58895	0.628821	0.181905	0.0244839	0	50.9659	4.9466	0	0.393025	0.00645738	5764.72	27936	4.84603	3	0	POLYGON ((15.540344970743831 43.952883856404924, 15.540434680815906 43.95275570031538, 15.541101091941869 43.952396863624415, 15.542267312086835 43.952255892195694, 15.542908092534503 43.952089289189416, 15.543728291327625 43.95203802693345, 15.5442665463641 43.95182016167115, 15.544651014632677 43.95148695565854, 15.545663448009748 43.949295486797325, 15.546483646802926 43.947655089211025, 15.54…	Vransko Lake	Croatia	7	5748	biodiversity, flood control, water quality regulation, recreation, eco-tourism, research, livestock	burning, resource extraction, pollution	2007-09-08	Some red burning, illegal fhishing and peachers, illegal garbage disposal	588.2	21.1001
2020-09-29	2886.81	14	3	1	1	1	10	2	13	2845.26	222.063	1	0	1.68642	0	0	14.8886	vransko	29.4751	10.1882	3.58895	0.628821	0.181905	0.0244839	0	50.9659	4.9466	0	0.393025	0.00645738	5764.72	27936	4.84603	3	0	POLYGON ((15.540344970743831 43.952883856404924, 15.540434680815906 43.95275570031538, 15.541101091941869 43.952396863624415, 15.542267312086835 43.952255892195694, 15.542908092534503 43.952089289189416, 15.543728291327625 43.95203802693345, 15.5442665463641 43.95182016167115, 15.544651014632677 43.95148695565854, 15.545663448009748 43.949295486797325, 15.546483646802926 43.947655089211025, 15.54…	Vransko Lake	Croatia	7	5748	biodiversity, flood control, water quality regulation, recreation, eco-tourism, research, livestock	burning, resource extraction, pollution	2007-09-08	Some red burning, illegal fhishing and peachers, illegal garbage disposal	553.2	16.7195
2020-10-06	2853.56	6	2	2	2	2	0	2	5	2841.34	570.712	1	0	3.29167	0	1.6	17.7986	vransko	29.4751	10.1882	3.58895	0.628821	0.181905	0.0244839	0	50.9659	4.9466	0	0.393025	0.00645738	5764.72	27936	4.84603	3	0	POLYGON ((15.540344970743831 43.952883856404924, 15.540434680815906 43.95275570031538, 15.541101091941869 43.952396863624415, 15.542267312086835 43.952255892195694, 15.542908092534503 43.952089289189416, 15.543728291327625 43.95203802693345, 15.5442665463641 43.95182016167115, 15.544651014632677 43.95148695565854, 15.545663448009748 43.949295486797325, 15.546483646802926 43.947655089211025, 15.54…	Vransko Lake	Croatia	7	5748	biodiversity, flood control, water quality regulation, recreation, eco-tourism, research, livestock	burning, resource extraction, pollution	2007-09-08	Some red burning, illegal fhishing and peachers, illegal garbage disposal	126.8	18.7135
2020-10-11	2930.56	20	4	0	1	0	17	2	19	2870.32	154.24	1	0	1.15385	0	346.2	16.5771	vransko	29.4751	10.1882	3.58895	0.628821	0.181905	0.0244839	0	50.9659	4.9466	0	0.393025	0.00645738	5764.72	27936	4.84603	3	0	POLYGON ((15.540344970743831 43.952883856404924, 15.540434680815906 43.95275570031538, 15.541101091941869 43.952396863624415, 15.542267312086835 43.952255892195694, 15.542908092534503 43.952089289189416, 15.543728291327625 43.95203802693345, 15.5442665463641 43.95182016167115, 15.544651014632677 43.95148695565854, 15.545663448009748 43.949295486797325, 15.546483646802926 43.947655089211025, 15.54…	Vransko Lake	Croatia	7	5748	biodiversity, flood control, water quality regulation, recreation, eco-tourism, research, livestock	burning, resource extraction, pollution	2007-09-08	Some red burning, illegal fhishing and peachers, illegal garbage disposal	948.9	16.7689
2020-10-18	2859.64	7	0	5	0	1	0	2	3	2850.02	953.213	4	0.4	20.6446	-1.11022e-16	0	12.53	vransko	29.4751	10.1882	3.58895	0.628821	0.181905	0.0244839	0	50.9659	4.9466	0	0.393025	0.00645738	5764.72	27936	4.84603	3	0	POLYGON ((15.540344970743831 43.952883856404924, 15.540434680815906 43.95275570031538, 15.541101091941869 43.952396863624415, 15.542267312086835 43.952255892195694, 15.542908092534503 43.952089289189416, 15.543728291327625 43.95203802693345, 15.5442665463641 43.95182016167115, 15.544651014632677 43.95148695565854, 15.545663448009748 43.949295486797325, 15.546483646802926 43.947655089211025, 15.54…	Vransko Lake	Croatia	7	5748	biodiversity, flood control, water quality regulation, recreation, eco-tourism, research, livestock	burning, resource extraction, pollution	2007-09-08	Some red burning, illegal fhishing and peachers, illegal garbage disposal	836.7	13.2193
2020-10-23	2888.71	11	5	1	1	1	7	2	11	2856.64	262.61	0	0	0	0	0	15.2693	vransko	29.4751	10.1882	3.58895	0.628821	0.181905	0.0244839	0	50.9659	4.9466	0	0.393025	0.00645738	5764.72	27936	4.84603	3	0	POLYGON ((15.540344970743831 43.952883856404924, 15.540434680815906 43.95275570031538, 15.541101091941869 43.952396863624415, 15.542267312086835 43.952255892195694, 15.542908092534503 43.952089289189416, 15.543728291327625 43.95203802693345, 15.5442665463641 43.95182016167115, 15.544651014632677 43.95148695565854, 15.545663448009748 43.949295486797325, 15.546483646802926 43.947655089211025, 15.54…	Vransko Lake	Croatia	7	5748	biodiversity, flood control, water quality regulation, recreation, eco-tourism, research, livestock	burning, resource extraction, pollution	2007-09-08	Some red burning, illegal fhishing and peachers, illegal garbage disposal	28.4	13.5187
2020-10-30	2859.21	5	2	2	1	1	0	2	3	2849.07	953.069	2	0.166667	10.9816	0	0	14.2529	vransko	29.4751	10.1882	3.58895	0.628821	0.181905	0.0244839	0	50.9659	4.9466	0	0.393025	0.00645738	5764.72	27936	4.84603	3	0	POLYGON ((15.540344970743831 43.952883856404924, 15.540434680815906 43.95275570031538, 15.541101091941869 43.952396863624415, 15.542267312086835 43.952255892195694, 15.542908092534503 43.952089289189416, 15.543728291327625 43.95203802693345, 15.5442665463641 43.95182016167115, 15.544651014632677 43.95148695565854, 15.545663448009748 43.949295486797325, 15.546483646802926 43.947655089211025, 15.54…	Vransko Lake	Croatia	7	5748	biodiversity, flood control, water quality regulation, recreation, eco-tourism, research, livestock	burning, resource extraction, pollution	2007-09-08	Some red burning, illegal fhishing and peachers, illegal garbage disposal	614.9	14.8481
2020-11-04	2887.81	13	3	1	2	2	8	2	12	2850.61	240.651	1	0	1.82694	0	98	15.0457	vransko	29.4751	10.1882	3.58895	0.628821	0.181905	0.0244839	0	50.9659	4.9466	0	0.393025	0.00645738	5764.72	27936	4.84603	3	0	POLYGON ((15.540344970743831 43.952883856404924, 15.540434680815906 43.95275570031538, 15.541101091941869 43.952396863624415, 15.542267312086835 43.952255892195694, 15.542908092534503 43.952089289189416, 15.543728291327625 43.95203802693345, 15.5442665463641 43.95182016167115, 15.544651014632677 43.95148695565854, 15.545663448009748 43.949295486797325, 15.546483646802926 43.947655089211025, 15.54…	Vransko Lake	Croatia	7	5748	biodiversity, flood control, water quality regulation, recreation, eco-tourism, research, livestock	burning, resource extraction, pollution	2007-09-08	Some red burning, illegal fhishing and peachers, illegal garbage disposal	98	14.2876
2020-11-11	2877	11	3	3	1	1	2	5	8	2858.48	359.626	3	0.0666667	8.30563	0	0	10.7114	vransko	29.4751	10.1882	3.58895	0.628821	0.181905	0.0244839	0	50.9659	4.9466	0	0.393025	0.00645738	5764.72	27936	4.84603	3	0	POLYGON ((15.540344970743831 43.952883856404924, 15.540434680815906 43.95275570031538, 15.541101091941869 43.952396863624415, 15.542267312086835 43.952255892195694, 15.542908092534503 43.952089289189416, 15.543728291327625 43.95203802693345, 15.5442665463641 43.95182016167115, 15.544651014632677 43.95148695565854, 15.545663448009748 43.949295486797325, 15.546483646802926 43.947655089211025, 15.54…	Vransko Lake	Croatia	7	5748	biodiversity, flood control, water quality regulation, recreation, eco-tourism, research, livestock	burning, resource extraction, pollution	2007-09-08	Some red burning, illegal fhishing and peachers, illegal garbage disposal	20.2	12.657
2020-11-16	2944.09	17	4	2	1	1	8	6	17	2892.14	173.182	0	0	0	0	0	14.4264	vransko	29.4751	10.1882	3.58895	0.628821	0.181905	0.0244839	0	50.9659	4.9466	0	0.393025	0.00645738	5764.72	27936	4.84603	3	0	POLYGON ((15.540344970743831 43.952883856404924, 15.540434680815906 43.95275570031538, 15.541101091941869 43.952396863624415, 15.542267312086835 43.952255892195694, 15.542908092534503 43.952089289189416, 15.543728291327625 43.95203802693345, 15.5442665463641 43.95182016167115, 15.544651014632677 43.95148695565854, 15.545663448009748 43.949295486797325, 15.546483646802926 43.947655089211025, 15.54…	Vransko Lake	Croatia	7	5748	biodiversity, flood control, water quality regulation, recreation, eco-tourism, research, livestock	burning, resource extraction, pollution	2007-09-08	Some red burning, illegal fhishing and peachers, illegal garbage disposal	17.3	12.2765
2020-11-23	2886.11	8	4	4	1	1	0	3	6	2853.19	481.019	2	0.047619	5.48588	0	0	9.06071	vransko	29.4751	10.1882	3.58895	0.628821	0.181905	0.0244839	0	50.9659	4.9466	0	0.393025	0.00645738	5764.72	27936	4.84603	3	0	POLYGON ((15.540344970743831 43.952883856404924, 15.540434680815906 43.95275570031538, 15.541101091941869 43.952396863624415, 15.542267312086835 43.952255892195694, 15.542908092534503 43.952089289189416, 15.543728291327625 43.95203802693345, 15.5442665463641 43.95182016167115, 15.544651014632677 43.95148695565854, 15.545663448009748 43.949295486797325, 15.546483646802926 43.947655089211025, 15.54…	Vransko Lake	Croatia	7	5748	biodiversity, flood control, water quality regulation, recreation, eco-tourism, research, livestock	burning, resource extraction, pollution	2007-09-08	Some red burning, illegal fhishing and peachers, illegal garbage disposal	84.1	9.59765
2020-11-28	2823.16	18	6	7	2	3	8	1	16	2761.64	176.447	2	0.00735294	2.26078	0	0	10.4	vransko	29.4751	10.1882	3.58895	0.628821	0.181905	0.0244839	0	50.9659	4.9466	0	0.393025	0.00645738	5764.72	27936	4.84603	3	0	POLYGON ((15.540344970743831 43.952883856404924, 15.540434680815906 43.95275570031538, 15.541101091941869 43.952396863624415, 15.542267312086835 43.952255892195694, 15.542908092534503 43.952089289189416, 15.543728291327625 43.95203802693345, 15.5442665463641 43.95182016167115, 15.544651014632677 43.95148695565854, 15.545663448009748 43.949295486797325, 15.546483646802926 43.947655089211025, 15.54…	Vransko Lake	Croatia	7	5748	biodiversity, flood control, water quality regulation, recreation, eco-tourism, research, livestock	burning, resource extraction, pollution	2007-09-08	Some red burning, illegal fhishing and peachers, illegal garbage disposal	0	9.14633
2020-12-05	2902.63	6	7	2	2	1	1	1	6	2883.97	483.771	0	0	0	0	0	14.8507	vransko	29.4751	10.1882	3.58895	0.628821	0.181905	0.0244839	0	50.9659	4.9466	0	0.393025	0.00645738	5764.72	27936	4.84603	3	0	POLYGON ((15.540344970743831 43.952883856404924, 15.540434680815906 43.95275570031538, 15.541101091941869 43.952396863624415, 15.542267312086835 43.952255892195694, 15.542908092534503 43.952089289189416, 15.543728291327625 43.95203802693345, 15.5442665463641 43.95182016167115, 15.544651014632677 43.95148695565854, 15.545663448009748 43.949295486797325, 15.546483646802926 43.947655089211025, 15.54…	Vransko Lake	Croatia	7	5748	biodiversity, flood control, water quality regulation, recreation, eco-tourism, research, livestock	burning, resource extraction, pollution	2007-09-08	Some red burning, illegal fhishing and peachers, illegal garbage disposal	41.1	8.52714
2020-12-10	2923.34	12	2	2	1	1	8	1	12	2894.69	243.611	0	0	0	0	39.8	8.03	vransko	29.4751	10.1882	3.58895	0.628821	0.181905	0.0244839	0	50.9659	4.9466	0	0.393025	0.00645738	5764.72	27936	4.84603	3	0	POLYGON ((15.540344970743831 43.952883856404924, 15.540434680815906 43.95275570031538, 15.541101091941869 43.952396863624415, 15.542267312086835 43.952255892195694, 15.542908092534503 43.952089289189416, 15.543728291327625 43.95203802693345, 15.5442665463641 43.95182016167115, 15.544651014632677 43.95148695565854, 15.545663448009748 43.949295486797325, 15.546483646802926 43.947655089211025, 15.54…	Vransko Lake	Croatia	7	5748	biodiversity, flood control, water quality regulation, recreation, eco-tourism, research, livestock	burning, resource extraction, pollution	2007-09-08	Some red burning, illegal fhishing and peachers, illegal garbage disposal	166.6	11.3224
2020-12-17	2930.69	13	2	10	1	1	0	2	6	2913.53	488.448	8	0.30303	25.1832	0.124446	0	8.89786	vransko	29.4751	10.1882	3.58895	0.628821	0.181905	0.0244839	0	50.9659	4.9466	0	0.393025	0.00645738	5764.72	27936	4.84603	3	0	POLYGON ((15.540344970743831 43.952883856404924, 15.540434680815906 43.95275570031538, 15.541101091941869 43.952396863624415, 15.542267312086835 43.952255892195694, 15.542908092534503 43.952089289189416, 15.543728291327625 43.95203802693345, 15.5442665463641 43.95182016167115, 15.544651014632677 43.95148695565854, 15.545663448009748 43.949295486797325, 15.546483646802926 43.947655089211025, 15.54…	Vransko Lake	Croatia	7	5748	biodiversity, flood control, water quality regulation, recreation, eco-tourism, research, livestock	burning, resource extraction, pollution	2007-09-08	Some red burning, illegal fhishing and peachers, illegal garbage disposal	0	8.38612
2020-12-22	2960.66	18	10	2	3	5	10	3	15	2918.23	197.377	3	0.0220588	4.06795	0	11.3	8.94643	vransko	29.4751	10.1882	3.58895	0.628821	0.181905	0.0244839	0	50.9659	4.9466	0	0.393025	0.00645738	5764.72	27936	4.84603	3	0	POLYGON ((15.540344970743831 43.952883856404924, 15.540434680815906 43.95275570031538, 15.541101091941869 43.952396863624415, 15.542267312086835 43.952255892195694, 15.542908092534503 43.952089289189416, 15.543728291327625 43.95203802693345, 15.5442665463641 43.95182016167115, 15.544651014632677 43.95148695565854, 15.545663448009748 43.949295486797325, 15.546483646802926 43.947655089211025, 15.54…	Vransko Lake	Croatia	7	5748	biodiversity, flood control, water quality regulation, recreation, eco-tourism, research, livestock	burning, resource extraction, pollution	2007-09-08	Some red burning, illegal fhishing and peachers, illegal garbage disposal	11.3	9.1302
2020-12-29	2944.7	10	6	4	3	2	0	3	6	2924.74	490.784	4	0.166667	13.765	0	81.6	12.6243	vransko	29.4751	10.1882	3.58895	0.628821	0.181905	0.0244839	0	50.9659	4.9466	0	0.393025	0.00645738	5764.72	27936	4.84603	3	0	POLYGON ((15.540344970743831 43.952883856404924, 15.540434680815906 43.95275570031538, 15.541101091941869 43.952396863624415, 15.542267312086835 43.952255892195694, 15.542908092534503 43.952089289189416, 15.543728291327625 43.95203802693345, 15.5442665463641 43.95182016167115, 15.544651014632677 43.95148695565854, 15.545663448009748 43.949295486797325, 15.546483646802926 43.947655089211025, 15.54…	Vransko Lake	Croatia	7	5748	biodiversity, flood control, water quality regulation, recreation, eco-tourism, research, livestock	burning, resource extraction, pollution	2007-09-08	Some red burning, illegal fhishing and peachers, illegal garbage disposal	446.2	10.1057
2021-01-03	2984.13	13	7	1	1	1	8	3	12	2947.55	248.677	1	0	1.37241	0	0	9.44714	vransko	29.4751	10.1882	3.58895	0.628821	0.181905	0.0244839	0	50.9659	4.9466	0	0.393025	0.00645738	5764.72	27936	4.84603	3	0	POLYGON ((15.540344970743831 43.952883856404924, 15.540434680815906 43.95275570031538, 15.541101091941869 43.952396863624415, 15.542267312086835 43.952255892195694, 15.542908092534503 43.952089289189416, 15.543728291327625 43.95203802693345, 15.5442665463641 43.95182016167115, 15.544651014632677 43.95148695565854, 15.545663448009748 43.949295486797325, 15.546483646802926 43.947655089211025, 15.54…	Vransko Lake	Croatia	7	5748	biodiversity, flood control, water quality regulation, recreation, eco-tourism, research, livestock	burning, resource extraction, pollution	2007-09-08	Some red burning, illegal fhishing and peachers, illegal garbage disposal	577.7	9.95459
2021-01-10	2965.95	7	2	2	1	1	1	3	6	2952.68	494.325	1	0	3.65386	0	0	5.37286	vransko	29.4751	10.1882	3.58895	0.628821	0.181905	0.0244839	0	50.9659	4.9466	0	0.393025	0.00645738	5764.72	27936	4.84603	3	0	POLYGON ((15.540344970743831 43.952883856404924, 15.540434680815906 43.95275570031538, 15.541101091941869 43.952396863624415, 15.542267312086835 43.952255892195694, 15.542908092534503 43.952089289189416, 15.543728291327625 43.95203802693345, 15.5442665463641 43.95182016167115, 15.544651014632677 43.95148695565854, 15.545663448009748 43.949295486797325, 15.546483646802926 43.947655089211025, 15.54…	Vransko Lake	Croatia	7	5748	biodiversity, flood control, water quality regulation, recreation, eco-tourism, research, livestock	burning, resource extraction, pollution	2007-09-08	Some red burning, illegal fhishing and peachers, illegal garbage disposal	350.7	6.65541
2021-01-15	2980.83	12	3	0	1	0	8	3	11	2945.32	270.984	1	0	1.49562	0	0	3.49214	vransko	29.4751	10.1882	3.58895	0.628821	0.181905	0.0244839	0	50.9659	4.9466	0	0.393025	0.00645738	5764.72	27936	4.84603	3	0	POLYGON ((15.540344970743831 43.952883856404924, 15.540434680815906 43.95275570031538, 15.541101091941869 43.952396863624415, 15.542267312086835 43.952255892195694, 15.542908092534503 43.952089289189416, 15.543728291327625 43.95203802693345, 15.5442665463641 43.95182016167115, 15.544651014632677 43.95148695565854, 15.545663448009748 43.949295486797325, 15.546483646802926 43.947655089211025, 15.54…	Vransko Lake	Croatia	7	5748	biodiversity, flood control, water quality regulation, recreation, eco-tourism, research, livestock	burning, resource extraction, pollution	2007-09-08	Some red burning, illegal fhishing and peachers, illegal garbage disposal	180.7	4.3548
2021-01-22	2945.77	8	0	5	0	1	1	2	6	2930.66	490.962	2	0.047619	6.27572	0	0	13.9907	vransko	29.4751	10.1882	3.58895	0.628821	0.181905	0.0244839	0	50.9659	4.9466	0	0.393025	0.00645738	5764.72	27936	4.84603	3	0	POLYGON ((15.540344970743831 43.952883856404924, 15.540434680815906 43.95275570031538, 15.541101091941869 43.952396863624415, 15.542267312086835 43.952255892195694, 15.542908092534503 43.952089289189416, 15.543728291327625 43.95203802693345, 15.5442665463641 43.95182016167115, 15.544651014632677 43.95148695565854, 15.545663448009748 43.949295486797325, 15.546483646802926 43.947655089211025, 15.54…	Vransko Lake	Croatia	7	5748	biodiversity, flood control, water quality regulation, recreation, eco-tourism, research, livestock	burning, resource extraction, pollution	2007-09-08	Some red burning, illegal fhishing and peachers, illegal garbage disposal	0	6.59173
2021-01-27	3050.9	16	5	1	1	1	12	2	16	3014.26	190.681	0	0	0	0	0	3.42643	vransko	29.4751	10.1882	3.58895	0.628821	0.181905	0.0244839	0	50.9659	4.9466	0	0.393025	0.00645738	5764.72	27936	4.84603	3	0	POLYGON ((15.540344970743831 43.952883856404924, 15.540434680815906 43.95275570031538, 15.541101091941869 43.952396863624415, 15.542267312086835 43.952255892195694, 15.542908092534503 43.952089289189416, 15.543728291327625 43.95203802693345, 15.5442665463641 43.95182016167115, 15.544651014632677 43.95148695565854, 15.545663448009748 43.949295486797325, 15.546483646802926 43.947655089211025, 15.54…	Vransko Lake	Croatia	7	5748	biodiversity, flood control, water quality regulation, recreation, eco-tourism, research, livestock	burning, resource extraction, pollution	2007-09-08	Some red burning, illegal fhishing and peachers, illegal garbage disposal	468.7	8.07194
2021-02-03	2953.88	6	0	4	0	1	0	2	6	2937.05	492.313	0	0	0	0	0	11.2564	vransko	29.4751	10.1882	3.58895	0.628821	0.181905	0.0244839	0	50.9659	4.9466	0	0.393025	0.00645738	5764.72	27936	4.84603	3	0	POLYGON ((15.540344970743831 43.952883856404924, 15.540434680815906 43.95275570031538, 15.541101091941869 43.952396863624415, 15.542267312086835 43.952255892195694, 15.542908092534503 43.952089289189416, 15.543728291327625 43.95203802693345, 15.5442665463641 43.95182016167115, 15.544651014632677 43.95148695565854, 15.545663448009748 43.949295486797325, 15.546483646802926 43.947655089211025, 15.54…	Vransko Lake	Croatia	7	5748	biodiversity, flood control, water quality regulation, recreation, eco-tourism, research, livestock	burning, resource extraction, pollution	2007-09-08	Some red burning, illegal fhishing and peachers, illegal garbage disposal	474.3	8.31469
2021-02-08	2984.67	17	0	2	0	1	10	5	16	2939.33	186.542	1	0	1.02877	0	0	11.9114	vransko	29.4751	10.1882	3.58895	0.628821	0.181905	0.0244839	0	50.9659	4.9466	0	0.393025	0.00645738	5764.72	27936	4.84603	3	0	POLYGON ((15.540344970743831 43.952883856404924, 15.540434680815906 43.95275570031538, 15.541101091941869 43.952396863624415, 15.542267312086835 43.952255892195694, 15.542908092534503 43.952089289189416, 15.543728291327625 43.95203802693345, 15.5442665463641 43.95182016167115, 15.544651014632677 43.95148695565854, 15.545663448009748 43.949295486797325, 15.546483646802926 43.947655089211025, 15.54…	Vransko Lake	Croatia	7	5748	biodiversity, flood control, water quality regulation, recreation, eco-tourism, research, livestock	burning, resource extraction, pollution	2007-09-08	Some red burning, illegal fhishing and peachers, illegal garbage disposal	5.3	12.0163
2021-02-15	3006.62	8	5	1	2	1	2	3	7	2952.03	429.517	1	0	2.35285	0	0	3.215	vransko	29.4751	10.1882	3.58895	0.628821	0.181905	0.0244839	0	50.9659	4.9466	0	0.393025	0.00645738	5764.72	27936	4.84603	3	0	POLYGON ((15.540344970743831 43.952883856404924, 15.540434680815906 43.95275570031538, 15.541101091941869 43.952396863624415, 15.542267312086835 43.952255892195694, 15.542908092534503 43.952089289189416, 15.543728291327625 43.95203802693345, 15.5442665463641 43.95182016167115, 15.544651014632677 43.95148695565854, 15.545663448009748 43.949295486797325, 15.546483646802926 43.947655089211025, 15.54…	Vransko Lake	Croatia	7	5748	biodiversity, flood control, water quality regulation, recreation, eco-tourism, research, livestock	burning, resource extraction, pollution	2007-09-08	Some red burning, illegal fhishing and peachers, illegal garbage disposal	93.4	5.12378
2021-02-20	2998.93	16	2	4	1	1	8	3	16	2951.58	187.433	0	0	0	0	0	10.1079	vransko	29.4751	10.1882	3.58895	0.628821	0.181905	0.0244839	0	50.9659	4.9466	0	0.393025	0.00645738	5764.72	27936	4.84603	3	0	POLYGON ((15.540344970743831 43.952883856404924, 15.540434680815906 43.95275570031538, 15.541101091941869 43.952396863624415, 15.542267312086835 43.952255892195694, 15.542908092534503 43.952089289189416, 15.543728291327625 43.95203802693345, 15.5442665463641 43.95182016167115, 15.544651014632677 43.95148695565854, 15.545663448009748 43.949295486797325, 15.546483646802926 43.947655089211025, 15.54…	Vransko Lake	Croatia	7	5748	biodiversity, flood control, water quality regulation, recreation, eco-tourism, research, livestock	burning, resource extraction, pollution	2007-09-08	Some red burning, illegal fhishing and peachers, illegal garbage disposal	0	6.41704
2021-02-27	2944.08	9	2	3	1	1	0	5	8	2913.46	368.01	1	0	2.05768	0	0	10.9	vransko	29.4751	10.1882	3.58895	0.628821	0.181905	0.0244839	0	50.9659	4.9466	0	0.393025	0.00645738	5764.72	27936	4.84603	3	0	POLYGON ((15.540344970743831 43.952883856404924, 15.540434680815906 43.95275570031538, 15.541101091941869 43.952396863624415, 15.542267312086835 43.952255892195694, 15.542908092534503 43.952089289189416, 15.543728291327625 43.95203802693345, 15.5442665463641 43.95182016167115, 15.544651014632677 43.95148695565854, 15.545663448009748 43.949295486797325, 15.546483646802926 43.947655089211025, 15.54…	Vransko Lake	Croatia	7	5748	biodiversity, flood control, water quality regulation, recreation, eco-tourism, research, livestock	burning, resource extraction, pollution	2007-09-08	Some red burning, illegal fhishing and peachers, illegal garbage disposal	4.5	11.1029
2021-03-04	2966.97	16	4	0	1	0	10	5	16	2923.19	185.436	0	0	0	0	0	9.025	vransko	29.4751	10.1882	3.58895	0.628821	0.181905	0.0244839	0	50.9659	4.9466	0	0.393025	0.00645738	5764.72	27936	4.84603	3	0	POLYGON ((15.540344970743831 43.952883856404924, 15.540434680815906 43.95275570031538, 15.541101091941869 43.952396863624415, 15.542267312086835 43.952255892195694, 15.542908092534503 43.952089289189416, 15.543728291327625 43.95203802693345, 15.5442665463641 43.95182016167115, 15.544651014632677 43.95148695565854, 15.545663448009748 43.949295486797325, 15.546483646802926 43.947655089211025, 15.54…	Vransko Lake	Croatia	7	5748	biodiversity, flood control, water quality regulation, recreation, eco-tourism, research, livestock	burning, resource extraction, pollution	2007-09-08	Some red burning, illegal fhishing and peachers, illegal garbage disposal	4.5	9.81878
2021-03-11	2962.31	13	2	5	1	1	2	5	11	2916.92	269.301	2	0.0151515	3.20005	2.22045e-16	0	8.02214	vransko	29.4751	10.1882	3.58895	0.628821	0.181905	0.0244839	0	50.9659	4.9466	0	0.393025	0.00645738	5764.72	27936	4.84603	3	0	POLYGON ((15.540344970743831 43.952883856404924, 15.540434680815906 43.95275570031538, 15.541101091941869 43.952396863624415, 15.542267312086835 43.952255892195694, 15.542908092534503 43.952089289189416, 15.543728291327625 43.95203802693345, 15.5442665463641 43.95182016167115, 15.544651014632677 43.95148695565854, 15.545663448009748 43.949295486797325, 15.546483646802926 43.947655089211025, 15.54…	Vransko Lake	Croatia	7	5748	biodiversity, flood control, water quality regulation, recreation, eco-tourism, research, livestock	burning, resource extraction, pollution	2007-09-08	Some red burning, illegal fhishing and peachers, illegal garbage disposal	47.7	7.88092
2021-03-16	2968.17	13	6	0	1	0	8	4	12	2935.38	247.347	1	0	1.82693	0	0	8.10143	vransko	29.4751	10.1882	3.58895	0.628821	0.181905	0.0244839	0	50.9659	4.9466	0	0.393025	0.00645738	5764.72	27936	4.84603	3	0	POLYGON ((15.540344970743831 43.952883856404924, 15.540434680815906 43.95275570031538, 15.541101091941869 43.952396863624415, 15.542267312086835 43.952255892195694, 15.542908092534503 43.952089289189416, 15.543728291327625 43.95203802693345, 15.5442665463641 43.95182016167115, 15.544651014632677 43.95148695565854, 15.545663448009748 43.949295486797325, 15.546483646802926 43.947655089211025, 15.54…	Vransko Lake	Croatia	7	5748	biodiversity, flood control, water quality regulation, recreation, eco-tourism, research, livestock	burning, resource extraction, pollution	2007-09-08	Some red burning, illegal fhishing and peachers, illegal garbage disposal	247.7	9.30388
2021-03-23	2991.66	9	4	4	2	1	1	2	6	2977.49	498.61	3	0.107143	10.3837	0	22.7	7.82286	vransko	29.4751	10.1882	3.58895	0.628821	0.181905	0.0244839	0	50.9659	4.9466	0	0.393025	0.00645738	5764.72	27936	4.84603	3	0	POLYGON ((15.540344970743831 43.952883856404924, 15.540434680815906 43.95275570031538, 15.541101091941869 43.952396863624415, 15.542267312086835 43.952255892195694, 15.542908092534503 43.952089289189416, 15.543728291327625 43.95203802693345, 15.5442665463641 43.95182016167115, 15.544651014632677 43.95148695565854, 15.545663448009748 43.949295486797325, 15.546483646802926 43.947655089211025, 15.54…	Vransko Lake	Croatia	7	5748	biodiversity, flood control, water quality regulation, recreation, eco-tourism, research, livestock	burning, resource extraction, pollution	2007-09-08	Some red burning, illegal fhishing and peachers, illegal garbage disposal	103.6	6.63643
2021-03-28	2942.32	17	4	3	1	1	9	4	14	2895.98	210.166	3	0.00833333	4.11675	0.420162	0	12.54	vransko	29.4751	10.1882	3.58895	0.628821	0.181905	0.0244839	0	50.9659	4.9466	0	0.393025	0.00645738	5764.72	27936	4.84603	3	0	POLYGON ((15.540344970743831 43.952883856404924, 15.540434680815906 43.95275570031538, 15.541101091941869 43.952396863624415, 15.542267312086835 43.952255892195694, 15.542908092534503 43.952089289189416, 15.543728291327625 43.95203802693345, 15.5442665463641 43.95182016167115, 15.544651014632677 43.95148695565854, 15.545663448009748 43.949295486797325, 15.546483646802926 43.947655089211025, 15.54…	Vransko Lake	Croatia	7	5748	biodiversity, flood control, water quality regulation, recreation, eco-tourism, research, livestock	burning, resource extraction, pollution	2007-09-08	Some red burning, illegal fhishing and peachers, illegal garbage disposal	81.5	9.97112
2021-04-04	3026.87	12	4	6	2	3	1	3	7	3010.15	432.41	5	0.0727273	11.5176	0.456876	35.9	9.335	vransko	29.4751	10.1882	3.58895	0.628821	0.181905	0.0244839	0	50.9659	4.9466	0	0.393025	0.00645738	5764.72	27936	4.84603	3	0	POLYGON ((15.540344970743831 43.952883856404924, 15.540434680815906 43.95275570031538, 15.541101091941869 43.952396863624415, 15.542267312086835 43.952255892195694, 15.542908092534503 43.952089289189416, 15.543728291327625 43.95203802693345, 15.5442665463641 43.95182016167115, 15.544651014632677 43.95148695565854, 15.545663448009748 43.949295486797325, 15.546483646802926 43.947655089211025, 15.54…	Vransko Lake	Croatia	7	5748	biodiversity, flood control, water quality regulation, recreation, eco-tourism, research, livestock	burning, resource extraction, pollution	2007-09-08	Some red burning, illegal fhishing and peachers, illegal garbage disposal	208.2	13.3432
2021-04-09	2928.48	15	9	2	3	1	7	3	14	2886.38	209.177	1	0	1.17573	0	0	9.41643	vransko	29.4751	10.1882	3.58895	0.628821	0.181905	0.0244839	0	50.9659	4.9466	0	0.393025	0.00645738	5764.72	27936	4.84603	3	0	POLYGON ((15.540344970743831 43.952883856404924, 15.540434680815906 43.95275570031538, 15.541101091941869 43.952396863624415, 15.542267312086835 43.952255892195694, 15.542908092534503 43.952089289189416, 15.543728291327625 43.95203802693345, 15.5442665463641 43.95182016167115, 15.544651014632677 43.95148695565854, 15.545663448009748 43.949295486797325, 15.546483646802926 43.947655089211025, 15.54…	Vransko Lake	Croatia	7	5748	biodiversity, flood control, water quality regulation, recreation, eco-tourism, research, livestock	burning, resource extraction, pollution	2007-09-08	Some red burning, illegal fhishing and peachers, illegal garbage disposal	494	8.03663
2021-04-16	3058.36	9	3	4	1	1	0	4	6	3045.55	509.727	3	0.107143	8.64416	0	0	9.75214	vransko	29.4751	10.1882	3.58895	0.628821	0.181905	0.0244839	0	50.9659	4.9466	0	0.393025	0.00645738	5764.72	27936	4.84603	3	0	POLYGON ((15.540344970743831 43.952883856404924, 15.540434680815906 43.95275570031538, 15.541101091941869 43.952396863624415, 15.542267312086835 43.952255892195694, 15.542908092534503 43.952089289189416, 15.543728291327625 43.95203802693345, 15.5442665463641 43.95182016167115, 15.544651014632677 43.95148695565854, 15.545663448009748 43.949295486797325, 15.546483646802926 43.947655089211025, 15.54…	Vransko Lake	Croatia	7	5748	biodiversity, flood control, water quality regulation, recreation, eco-tourism, research, livestock	burning, resource extraction, pollution	2007-09-08	Some red burning, illegal fhishing and peachers, illegal garbage disposal	232.2	10.3949
2021-04-21	3056.31	15	5	2	1	2	8	4	14	3015.71	218.308	1	0	1.56589	0	0	11.6057	vransko	29.4751	10.1882	3.58895	0.628821	0.181905	0.0244839	0	50.9659	4.9466	0	0.393025	0.00645738	5764.72	27936	4.84603	3	0	POLYGON ((15.540344970743831 43.952883856404924, 15.540434680815906 43.95275570031538, 15.541101091941869 43.952396863624415, 15.542267312086835 43.952255892195694, 15.542908092534503 43.952089289189416, 15.543728291327625 43.95203802693345, 15.5442665463641 43.95182016167115, 15.544651014632677 43.95148695565854, 15.545663448009748 43.949295486797325, 15.546483646802926 43.947655089211025, 15.54…	Vransko Lake	Croatia	7	5748	biodiversity, flood control, water quality regulation, recreation, eco-tourism, research, livestock	burning, resource extraction, pollution	2007-09-08	Some red burning, illegal fhishing and peachers, illegal garbage disposal	48	10.2327
2021-04-28	2980.23	7	3	4	1	1	0	2	4	2970.46	745.058	3	0.2	11.5263	0	0	14.6093	vransko	29.4751	10.1882	3.58895	0.628821	0.181905	0.0244839	0	50.9659	4.9466	0	0.393025	0.00645738	5764.72	27936	4.84603	3	0	POLYGON ((15.540344970743831 43.952883856404924, 15.540434680815906 43.95275570031538, 15.541101091941869 43.952396863624415, 15.542267312086835 43.952255892195694, 15.542908092534503 43.952089289189416, 15.543728291327625 43.95203802693345, 15.5442665463641 43.95182016167115, 15.544651014632677 43.95148695565854, 15.545663448009748 43.949295486797325, 15.546483646802926 43.947655089211025, 15.54…	Vransko Lake	Croatia	7	5748	biodiversity, flood control, water quality regulation, recreation, eco-tourism, research, livestock	burning, resource extraction, pollution	2007-09-08	Some red burning, illegal fhishing and peachers, illegal garbage disposal	0	14.0838
2021-05-03	3064.68	22	5	8	2	2	10	2	15	3022.14	204.312	7	0.1	13.0891	0	0	14.995	vransko	29.4751	10.1882	3.58895	0.628821	0.181905	0.0244839	0	50.9659	4.9466	0	0.393025	0.00645738	5764.72	27936	4.84603	3	0	POLYGON ((15.540344970743831 43.952883856404924, 15.540434680815906 43.95275570031538, 15.541101091941869 43.952396863624415, 15.542267312086835 43.952255892195694, 15.542908092534503 43.952089289189416, 15.543728291327625 43.95203802693345, 15.5442665463641 43.95182016167115, 15.544651014632677 43.95148695565854, 15.545663448009748 43.949295486797325, 15.546483646802926 43.947655089211025, 15.54…	Vransko Lake	Croatia	7	5748	biodiversity, flood control, water quality regulation, recreation, eco-tourism, research, livestock	burning, resource extraction, pollution	2007-09-08	Some red burning, illegal fhishing and peachers, illegal garbage disposal	134.9	16.2688
2021-05-10	2948.54	18	10	6	8	6	0	4	8	2929.72	368.567	10	0.330882	32.8803	0	0	18.2721	vransko	29.4751	10.1882	3.58895	0.628821	0.181905	0.0244839	0	50.9659	4.9466	0	0.393025	0.00645738	5764.72	27936	4.84603	3	0	POLYGON ((15.540344970743831 43.952883856404924, 15.540434680815906 43.95275570031538, 15.541101091941869 43.952396863624415, 15.542267312086835 43.952255892195694, 15.542908092534503 43.952089289189416, 15.543728291327625 43.95203802693345, 15.5442665463641 43.95182016167115, 15.544651014632677 43.95148695565854, 15.545663448009748 43.949295486797325, 15.546483646802926 43.947655089211025, 15.54…	Vransko Lake	Croatia	7	5748	biodiversity, flood control, water quality regulation, recreation, eco-tourism, research, livestock	burning, resource extraction, pollution	2007-09-08	Some red burning, illegal fhishing and peachers, illegal garbage disposal	0	16.7534
2021-05-15	2977.58	26	14	7	5	8	10	4	18	2923.64	165.421	8	0.0933333	14.8282	0	0	16.2021	vransko	29.4751	10.1882	3.58895	0.628821	0.181905	0.0244839	0	50.9659	4.9466	0	0.393025	0.00645738	5764.72	27936	4.84603	3	0	POLYGON ((15.540344970743831 43.952883856404924, 15.540434680815906 43.95275570031538, 15.541101091941869 43.952396863624415, 15.542267312086835 43.952255892195694, 15.542908092534503 43.952089289189416, 15.543728291327625 43.95203802693345, 15.5442665463641 43.95182016167115, 15.544651014632677 43.95148695565854, 15.545663448009748 43.949295486797325, 15.546483646802926 43.947655089211025, 15.54…	Vransko Lake	Croatia	7	5748	biodiversity, flood control, water quality regulation, recreation, eco-tourism, research, livestock	burning, resource extraction, pollution	2007-09-08	Some red burning, illegal fhishing and peachers, illegal garbage disposal	196.2	17.2985
2021-05-22	2906.37	7	11	1	3	2	0	3	5	2892.94	581.274	2	0.0666667	6.40486	0	0	18.3836	vransko	29.4751	10.1882	3.58895	0.628821	0.181905	0.0244839	0	50.9659	4.9466	0	0.393025	0.00645738	5764.72	27936	4.84603	3	0	POLYGON ((15.540344970743831 43.952883856404924, 15.540434680815906 43.95275570031538, 15.541101091941869 43.952396863624415, 15.542267312086835 43.952255892195694, 15.542908092534503 43.952089289189416, 15.543728291327625 43.95203802693345, 15.5442665463641 43.95182016167115, 15.544651014632677 43.95148695565854, 15.545663448009748 43.949295486797325, 15.546483646802926 43.947655089211025, 15.54…	Vransko Lake	Croatia	7	5748	biodiversity, flood control, water quality regulation, recreation, eco-tourism, research, livestock	burning, resource extraction, pollution	2007-09-08	Some red burning, illegal fhishing and peachers, illegal garbage disposal	78.6	16.8024
2021-05-27	2912.32	23	3	5	1	1	13	4	20	2856.1	145.616	3	0.012987	3.43363	0	0	18.7057	vransko	29.4751	10.1882	3.58895	0.628821	0.181905	0.0244839	0	50.9659	4.9466	0	0.393025	0.00645738	5764.72	27936	4.84603	3	0	POLYGON ((15.540344970743831 43.952883856404924, 15.540434680815906 43.95275570031538, 15.541101091941869 43.952396863624415, 15.542267312086835 43.952255892195694, 15.542908092534503 43.952089289189416, 15.543728291327625 43.95203802693345, 15.5442665463641 43.95182016167115, 15.544651014632677 43.95148695565854, 15.545663448009748 43.949295486797325, 15.546483646802926 43.947655089211025, 15.54…	Vransko Lake	Croatia	7	5748	biodiversity, flood control, water quality regulation, recreation, eco-tourism, research, livestock	burning, resource extraction, pollution	2007-09-08	Some red burning, illegal fhishing and peachers, illegal garbage disposal	10.3	18.8806
2021-06-03	2887.21	11	5	5	1	2	0	5	7	2866.07	412.459	4	0.0666667	9.10822	0.320283	0	20.2593	vransko	29.4751	10.1882	3.58895	0.628821	0.181905	0.0244839	0	50.9659	4.9466	0	0.393025	0.00645738	5764.72	27936	4.84603	3	0	POLYGON ((15.540344970743831 43.952883856404924, 15.540434680815906 43.95275570031538, 15.541101091941869 43.952396863624415, 15.542267312086835 43.952255892195694, 15.542908092534503 43.952089289189416, 15.543728291327625 43.95203802693345, 15.5442665463641 43.95182016167115, 15.544651014632677 43.95148695565854, 15.545663448009748 43.949295486797325, 15.546483646802926 43.947655089211025, 15.54…	Vransko Lake	Croatia	7	5748	biodiversity, flood control, water quality regulation, recreation, eco-tourism, research, livestock	burning, resource extraction, pollution	2007-09-08	Some red burning, illegal fhishing and peachers, illegal garbage disposal	58.1	18.6779
2021-06-08	2921.55	22	6	0	3	2	14	5	21	2859.55	139.121	1	0	0.78424	0	78.9	21.7914	vransko	29.4751	10.1882	3.58895	0.628821	0.181905	0.0244839	0	50.9659	4.9466	0	0.393025	0.00645738	5764.72	27936	4.84603	3	0	POLYGON ((15.540344970743831 43.952883856404924, 15.540434680815906 43.95275570031538, 15.541101091941869 43.952396863624415, 15.542267312086835 43.952255892195694, 15.542908092534503 43.952089289189416, 15.543728291327625 43.95203802693345, 15.5442665463641 43.95182016167115, 15.544651014632677 43.95148695565854, 15.545663448009748 43.949295486797325, 15.546483646802926 43.947655089211025, 15.54…	Vransko Lake	Croatia	7	5748	biodiversity, flood control, water quality regulation, recreation, eco-tourism, research, livestock	burning, resource extraction, pollution	2007-09-08	Some red burning, illegal fhishing and peachers, illegal garbage disposal	156	20.8743
2021-06-15	2876.87	10	3	1	2	1	0	7	10	2851.5	287.687	0	0	0	0	0	21.6343	vransko	29.4751	10.1882	3.58895	0.628821	0.181905	0.0244839	0	50.9659	4.9466	0	0.393025	0.00645738	5764.72	27936	4.84603	3	0	POLYGON ((15.540344970743831 43.952883856404924, 15.540434680815906 43.95275570031538, 15.541101091941869 43.952396863624415, 15.542267312086835 43.952255892195694, 15.542908092534503 43.952089289189416, 15.543728291327625 43.95203802693345, 15.5442665463641 43.95182016167115, 15.544651014632677 43.95148695565854, 15.545663448009748 43.949295486797325, 15.546483646802926 43.947655089211025, 15.54…	Vransko Lake	Croatia	7	5748	biodiversity, flood control, water quality regulation, recreation, eco-tourism, research, livestock	burning, resource extraction, pollution	2007-09-08	Some red burning, illegal fhishing and peachers, illegal garbage disposal	33.6	22.9016
2021-06-20	2862.2	24	3	1	2	1	15	6	21	2753.98	136.295	3	0.00395257	2.3854	0.444252	0	25.9429	vransko	29.4751	10.1882	3.58895	0.628821	0.181905	0.0244839	0	50.9659	4.9466	0	0.393025	0.00645738	5764.72	27936	4.84603	3	0	POLYGON ((15.540344970743831 43.952883856404924, 15.540434680815906 43.95275570031538, 15.541101091941869 43.952396863624415, 15.542267312086835 43.952255892195694, 15.542908092534503 43.952089289189416, 15.543728291327625 43.95203802693345, 15.5442665463641 43.95182016167115, 15.544651014632677 43.95148695565854, 15.545663448009748 43.949295486797325, 15.546483646802926 43.947655089211025, 15.54…	Vransko Lake	Croatia	7	5748	biodiversity, flood control, water quality regulation, recreation, eco-tourism, research, livestock	burning, resource extraction, pollution	2007-09-08	Some red burning, illegal fhishing and peachers, illegal garbage disposal	0	23.5167
2021-06-27	2890.78	18	2	6	1	2	1	10	15	2849.87	192.718	3	0.0220588	4.44188	2.22045e-16	0	26.3029	vransko	29.4751	10.1882	3.58895	0.628821	0.181905	0.0244839	0	50.9659	4.9466	0	0.393025	0.00645738	5764.72	27936	4.84603	3	0	POLYGON ((15.540344970743831 43.952883856404924, 15.540434680815906 43.95275570031538, 15.541101091941869 43.952396863624415, 15.542267312086835 43.952255892195694, 15.542908092534503 43.952089289189416, 15.543728291327625 43.95203802693345, 15.5442665463641 43.95182016167115, 15.544651014632677 43.95148695565854, 15.545663448009748 43.949295486797325, 15.546483646802926 43.947655089211025, 15.54…	Vransko Lake	Croatia	7	5748	biodiversity, flood control, water quality regulation, recreation, eco-tourism, research, livestock	burning, resource extraction, pollution	2007-09-08	Some red burning, illegal fhishing and peachers, illegal garbage disposal	55.1	27.0829
2021-07-02	3028.14	29	9	0	3	2	17	9	27	2871.75	112.153	2	0	1.17641	0.5	0	24.4186	vransko	29.4751	10.1882	3.58895	0.628821	0.181905	0.0244839	0	50.9659	4.9466	0	0.393025	0.00645738	5764.72	27936	4.84603	3	0	POLYGON ((15.540344970743831 43.952883856404924, 15.540434680815906 43.95275570031538, 15.541101091941869 43.952396863624415, 15.542267312086835 43.952255892195694, 15.542908092534503 43.952089289189416, 15.543728291327625 43.95203802693345, 15.5442665463641 43.95182016167115, 15.544651014632677 43.95148695565854, 15.545663448009748 43.949295486797325, 15.546483646802926 43.947655089211025, 15.54…	Vransko Lake	Croatia	7	5748	biodiversity, flood control, water quality regulation, recreation, eco-tourism, research, livestock	burning, resource extraction, pollution	2007-09-08	Some red burning, illegal fhishing and peachers, illegal garbage disposal	28.2	26.1124
[truncated: 28,787 more rows]
